# Supplementary material for: Assessing the genetic integrity of sugarcane germplasm in the USDA-ARS National Plant Germplasm System collection using single-dose SNP markers
Source: Front Plant Sci. 2024 Jan 4;14:1337736. doi: 10.3389/fpls.2023.1337736 (PMC10794611; doi:10.3389/fpls.2023.1337736)
Supplement: Supplementary file 2 [file Table_1.xlsx]

## Sheet: Table S1
Table S1. List of Saccharum accessions used in this study
Sample.name	Species	Clone name	Location	Country of origin	ORIGIN
SAC0287	officinarum	26Q2873	WD1-SC-01-01	US	United States Hawaii
SAC0288	officinarum	AKOKI 22	WD1-SC-01-02	US	Hawaii
SAC0289	officinarum	ANOMAN	WD1-SC-01-03	Papua New Guinea	New Guinea
SAC0290	officinarum	ARUNDOID C	WD1-SC-01-05	US	United States Hawaii
SAC0291	officinarum	BAMBOO AMARILLA	WD1-SC-01-07	US	Hawaii Agricultural Research Center
SAC0292	officinarum	BANDJARMASIN HITAM	WD1-SC-01-09	Indonesia	Java Indonesia
SAC0293	officinarum	BLACK CHERIBON	WD1-SC-01-12	Australia	Queensland Australia
SAC0294	officinarum	BLACK INNES	WD1-SC-01-15	Unknown	Unknown
SAC0295	officinarum	BOURBORIET SURINAM	WD1-SC-01-16	Unknown	Unknown
SAC0296	officinarum	BADILLA	WD1-SC-01-17	Unknown	Unknown
SAC0297	officinarum	CHU-ZHE	WD1-SC-01-19	Unknown	Unknown
SAC0298	officinarum	F36-819	WD1-SC-01-23	US	Hawaii
SAC0299	officinarum	F36-819	WD1-SC-01-24	US	Hawaii
SAC0300	officinarum	IK 76-065	WD1-SC-01-25	US	Hawaii
SAC0301	officinarum	FIJI	WD1-SC-01-26	Unknown	Unknown
SAC0302	hybrid	BO 11	WD1-SC-01-28	India	Coimbatore India
SAC0303	officinarum	HAWAIIAN ORIGINAL	WD1-SC-01-35	Taiwan	Taiwan
SAC0304	hybrid	POJ 0501	WD1-SC-01-36	Indonesia	Indonesia
SAC0305	officinarum	KHAJURIA	WD1-SC-02-02	India	India
SAC0306	officinarum	IS 76-319	WD1-SC-02-06	Unknown	Unknown
SAC0307	officinarum	IK 76-108	WD1-SC-02-12	Australia	Brisbane Australia
SAC0308	officinarum	IK 76-069	WD1-SC-02-14	Australia	Brisbane Australia
SAC0309	officinarum	IJ 76-521	WD1-SC-02-21	Australia	Brisbane Australia
SAC0310	officinarum	IJ76-418B	WD1-SC-02-25	US	Hawaii
SAC0311	officinarum	IJ 76-418A PINK STALK	WD1-SC-02-26	Australia	Brisbane Australia
SAC0312	officinarum	IJ 76-316	WD1-SC-02-30	Indonesia	Indonesia
SAC0313	officinarum	IA 3330	WD1-SC-02-32	US	Hawaii
SAC0314	officinarum	HIND'S SPECIAL	WD1-SC-02-34	Philippines	Philippines
SAC0315	officinarum	HINAHINA 18	WD1-SC-02-35	US	Hawaii
SAC0316	officinarum	MANTEIGA	WD1-SC-03-07	Unknown	Dc
SAC0317	officinarum	MOL 6063	WD1-SC-03-09	US	Hawaii
SAC0318	officinarum	MUNTOK JAVA	WD1-SC-03-10	Indonesia	Indonesia
SAC0319	hybrid	US 67-22-2	WD1-SC-03-17	US	United States
SAC0320	robustum	IJ 76-547	WD1-SC-03-18	Barbados	Barbados
SAC0321	robustum	IN 84-045	WD1-SC-03-21	Barbados	Barbados
SAC0322	robustum	IJ 76-547	WD1-SC-03-22	Guadeloupe	Guadeloupe
SAC0323	officinarum	NG 28-014 (SS 58-08)	WD1-SC-03-26	Papua New Guinea	Papua New Guinea
SAC0324	officinarum	NG 28-043B	WD1-SC-03-33	Unknown	Unknown
SAC0325	officinarum	NG 28-055	WD1-SC-03-34	Papua New Guinea	Papua New Guinea
SAC0326	officinarum	NG 57-072	WD1-SC-04-01	Papua New Guinea	Papua New Guinea
SAC0327	robustum	NG 77-094	WD1-SC-04-03	Guadeloupe	Guadeloupe
SAC0328	robustum	IN 81-014	WD1-SC-04-06	Barbados	Barbados
SAC0329	officinarum	NG 51 148	WD1-SC-04-07	Papua New Guinea	Papua New Guinea
SAC0330	robustum	NG 77-021	WD1-SC-04-10	Papua New Guinea	Papua New Guinea Or Guadeloupe
SAC0331	officinarum	NG 51-099	WD1-SC-04-12	Papua New Guinea	Papua New Guinea
SAC0332	unknown	IK 76-77	WD1-SC-04-14	Unknown	Unknown
SAC0333	officinarum	NG 51-042	WD1-SC-04-15	Papua New Guinea	Papua New Guinea
SAC0334	officinarum	NG 51 038	WD1-SC-04-16	Papua New Guinea	Papua New Guinea
SAC0335	unknown	CRISTAFINA	WD1-SC-04-21	Unknown	Unknown
SAC0336	robustum	NG 57-208	WD1-SC-04-22	Unknown	Mia#=hawaii; Q#=guadeloupe
SAC0337	hybrid	US 67-22-2	WD1-SC-04-24	US	United States
SAC0338	hybrid	N 37	WD1-SC-04-25	South Africa	South Africa
SAC0339	officinarum	NG 28-099	WD1-SC-04-31	Papua New Guinea	Papua New Guinea
SAC0340	officinarum	NG 28-087 O.P. PLANT 3	WD1-SC-04-32	Unknown	Unknown
SAC0341	officinarum	NG 28-033	WD1-SC-04-35	Papua New Guinea	Papua New Guinea
SAC0342	officinarum	BA 11569	WD1-SC-05-01	Barbados	Barbados
SAC0343	spontaneum	IK 76-72	WD1-SC-05-06	Barbados	Barbados
SAC0344	robustum	NG 77-024	WD1-SC-05-07	Papua New Guinea	Papua New Guinea
SAC0345	officinarum	NG 57 144	WD1-SC-05-09	Papua New Guinea	Papua New Guinea
SAC0346	arundinaceum	IK 76-044	WD1-SC-05-15	Indonesia	Indonesia
SAC0347	robustum	NG 57-238	WD1-SC-05-18	Barbados	Barbados
SAC0348	officinarum	51NG9	WD1-SC-05-19	US	United States
SAC0349	officinarum	NG 77-042	WD1-SC-05-23	Papua New Guinea	Papua New Guinea Or Brazil
SAC0350	unknown	UNKNOWN #1	WD1-SC-05-25	Unknown	Unknown
SAC0351	unknown	UNKNOWN	WD1-SC-05-29	Unknown	Unknown
SAC0352	officinarum	NG 77-092	GH	Papua New Guinea	Papua New Guinea
SAC0353	robustum	NG 77-136	WD1-SC-05-33	Barbados	Barbados
SAC0354	officinarum	8272	WD1-SC-06-01	Malaysia	Malaysia
SAC0355	officinarum	8268	WD1-SC-06-02	Malaysia	Malaysia
SAC0356	officinarum	P-MAG-84-21	WD1-SC-06-09	Philippines	Philippines
SAC0357	officinarum	P-MAG-84-13	WD1-SC-06-11	Philippines	Philippines
SAC0358	officinarum	P-MAG-84-2	WD1-SC-06-12	Philippines	Philippines
SAC0359	officinarum	PADANGSCHE DARK RED	WD1-SC-06-16	Spain	Spain Alicante
SAC0360	officinarum	8276	WD1-SC-06-21	Malaysia	Malaysia
SAC0361	officinarum	BNS 1070	WD1-SC-06-25	Guadeloupe	Guadeloupe
SAC0362	officinarum	NG 77-182	WD1-SC-06-29	Papua New Guinea	Papua New Guinea
SAC0363	officinarum	NG 77-154	WD1-SC-06-31	Papua New Guinea	Papua New Guinea
SAC0364	officinarum	NG 77-137	WD1-SC-06-32	Papua New Guinea	Papua New Guinea
SAC0365	officinarum	NG 77-135	WD1-SC-06-33	Papua New Guinea	Papua New Guinea
SAC0366	officinarum	8275	WD1-SC-07-01	Malaysia	Malaysia
SAC0367	officinarum	8284	WD1-SC-07-02	Malaysia	Malaysia
SAC0368	officinarum	SAIPAN	WD1-SC-07-03	India	India
SAC0369	officinarum	SPAANSCH	WD1-SC-07-05	US	U.s. Maryland
SAC0370	officinarum	SS 57-09	WD1-SC-07-08	Papua New Guinea	Papua New Guinea
SAC0371	officinarum	SYLVA	WD1-SC-07-12	Mauritius	Mauritius
SAC0372	officinarum	THA 82-84	WD1-SC-07-14	Thailand	Thailand
SAC0373	officinarum	UM 68-010	WD1-SC-07-17	Malaysia	Malaysia
SAC0374	unknown	UNKNOWN (1995: R43-P023)	WD1-SC-07-22	Unknown	Unknown
SAC0375	unknown	UNKNOWN (1995: R45-P078)	WD1-SC-07-26	Unknown	Unknown
SAC0376	unknown	UNKNOWN (1995: R45-P109)	WD1-SC-07-27	Unknown	Unknown
SAC0377	unknown	UNKNOWN (1995: R45-P123)	WD1-SC-07-30	Unknown	Unknown
SAC0378	unknown	UNKNOWN (1995: R45-P126)	WD1-SC-07-31	Unknown	Unknown
SAC0379	unknown	UNKNOWN (1995: R56-P24)	WD1-SC-07-32	Unknown	Unknown
SAC0380	unknown	UNKNOWN (1995: R56-P50)	WD1-SC-07-33	Unknown	Unknown
SAC0381	unknown	UNKNOWN ROW 37 POINT 55	WD1-SC-07-35	Unknown	Unknown
SAC0382	unknown	21 NG3 (SEED)	WD1-SC-08-01	Unknown	Unknown
SAC0383	officinarum	YELLOW BAMBOO (SEED)	WD1-SC-08-03	Unknown	Unknown
SAC0384	officinarum	NOT KOKEA (SEED)	WD1-SC-08-04	US	United States
SAC0385	officinarum	VELLAI	WD1-SC-08-05	Brazil	Brazil
SAC0386	unknown	MEXICAN STRIPED (SEEDLING)	WD1-SC-08-06	Unknown	Unknown
SAC0387	officinarum	NG 57 213 (SEED)	GH	Papua New Guinea	Papua New Guinea
SAC0388	unknown	21 NG 17	WD1-SC-08-11	Panama	Panama
SAC0389	barberi	REORI	WD1-SC-08-12	India	India Tamil Nadu
SAC0390	unknown	UNKNOWN	WD1-SC-08-13	Unknown	Unknown
SAC0391	robustum	NG 57-238	WD1-SC-08-14	Unknown	Unknown
SAC0392	robustum	IM 76-234	WD1-SC-08-18	Barbados	Barbados
SAC0393	hybrid	CG 98-10	WD1-SC-08-20	Guatemala	Guatemala
SAC0394	officinarum	NG 57-030	WD1-SC-08-21	Guadeloupe	Guadeloupe
SAC0395	robustum	IJ 76-414	WD1-SC-08-22	Barbados	Barbados
SAC0396	robustum	NG 77-094	WD1-SC-08-32	Papua New Guinea	Papua New Guinea
SAC0397	unknown	UNKNOWN 45-88	WD1-SC-08-33	Unknown	Unknown
SAC0398	unknown	UNKNOWN ROW 65 POINT 10	WD1-SC-08-34	Unknown	Unknown
SAC0399	unknown	UNKNOWN ROW 57 POINT 58	WD1-SC-08-36	Unknown	Unknown
SAC0401	officinarum	UM 68-015	WD1-SC-09-02	Malaysia	Malaysia
SAC0402	unknown	UNKNOWN	WD1-SC-09-03	Unknown	Unknown
SAC0403	unknown	UNKNOWN	WD1-SC-09-04	Unknown	Unknown
SAC0404	unknown	UNKNOWN (1995) R 59 P 33	WD1-SC-09-05	Unknown	Unknown
SAC0405	robustum	NG 77-021	WD1-SC-09-06	Guadeloupe	Guadeloupe
SAC0406	hybrid	H 83-6147	WD1-SC-09-07	US	United States Hawaii
SAC0407	hybrid	US 67-22-2	WD1-SC-09-10N	US	United States
SAC0408	hybrid	US 67-22-2	WD1-SC-09-10S	US	United States
SAC0410	barberi	REHA SPORT	WD1-SC-09-17	India	India Tamil Nadu
SAC0411	unknown	UNKNOWN 45-60 TRELLIS	WD1-SC-09-18	Unknown	Unknown
SAC0412	unknown	UNKNOWN 45-66	WD1-SC-09-26	Unknown	Unknown
SAC0413	unknown	MOL 6073	WD1-SC-09-27	US	United States Hawaii
SAC0414	robustum	NG 77-235	WD1-SC-09-28	Papua New Guinea	Papua New Guinea
SAC0416	hybrid	FIJI 57	WD1-SC-09-32	Fiji	Fiji
SAC0417	barberi	GANAPATHY	WD1-SC-10-01	India	India Tamil Nadu
SAC0418	hybrid	CG02-163	WD1-SC-10-04	Guatemala	Guatemala
SAC0419	robustum	IS 76-138	WD1-SC-10-08	Guadeloupe	Guadeloupe
SAC0420	officinarum	MANJRI RED	WD1-SC-10-09	Barbados	Barbados
SAC0421	officinarum	MAURITIOUS GUINGHAM	WD1-SC-10-10	Guadeloupe	Guadeloupe
SAC0422	officinarum	MOGALI	WD1-SC-10-11	Barbados	Barbados
SAC0423	officinarum	NG 57-030	WD1-SC-10-13	Guadeloupe	Guadeloupe
SAC0424	robustum	NG 77-122	WD1-SC-10-17N	Barbados	Barbados
SAC0425	barberi	MESANGEN	WD1-SC-10-17S	Guyana	Guyana
SAC0426	robustum	IN 84-045	WD1-SC-10-18	Barbados	Barbados
SAC0427	robustum	NG 57-238	WD1-SC-10-19	Barbados	Barbados
SAC0428	hybrid	ZN 7	WD1-SC-10-22	South Africa	South Africa
SAC0429	robustum	NG 77-021	WD1-SC-10-23	Guadeloupe	Guadeloupe
SAC0430	robustum	NG 28-289	WD1-SC-10-28	Papua New Guinea	Papua New Guinea
SAC0431	hybrid	DI 52	WD1-SC-11-02	Indonesia	Indonesia Java
SAC0432	hybrid	CP 89-2377	WD1-SC-11-04	US	United States Florida
SAC0433	unknown	DUPARI	WD1-SC-11-06	Unknown	Unknown
SAC0434	hybrid	CP 70-1527	WD1-SC-11-07	US	United States Florida
SAC0435	unknown	CP 91-555	WD1-SC-11-08	US	United States Louisiana
SAC0436	robustum	NG 57-208	WD1-SC-11-11	US	United States Hawaii
SAC0437	hybrid	CP 44-0155	WD1-SC-11-13	US	United States Florida
SAC0438	hybrid	CG 98-10	WD1-SC-11-14	Guatemala	Guatemala
SAC0439	hybrid	CP 27-0139	WD1-SC-11-15	US	United States Florida
SAC0440	hybrid	ZN 10	WD1-SC-11-16	Zimbabwe	Zimbabwe
SAC0441	hybrid	COS 321	GH	India	India
SAC0442	unknown	IJ 76-236	WD1-SC-11-18	Unknown	Unknown
SAC0443	hybrid	CO 6806	WD1-SC-11-19	India	India
SAC0444	robustum	S. ROBUSTUM	WD1-SC-11-23	Unknown	Unknown
SAC0445	hybrid	CO 213	WD1-SC-11-27	India	India
SAC0446	robustum	NG 57-238	WD1-SC-11-29	Barbados	Barbados
SAC0447	robustum	NG 57-208	WD1-SC-11-34	US	United States Hawaii
SAC0448	unknown	TOBOE SALAK TOEWA	WD1-SC-11-35	Brazil	Brazil
SAC0449	robustum	MOL 6077	WD1-SC-12-01	US	United States Hawaii
SAC0450	hybrid	H 32-8560	WD1-SC-12-04	US	United States Hawaii
SAC0451	sinense	AGOULE	WD1-SC-12-07	India	India Tamil Nadu
SAC0452	hybrid	LCP 86-454	WD1-SC-12-08	US	United States Louisiana
SAC0453	hybrid	FIJI 53	WD1-SC-12-11	Fiji	Fiji
SAC0454	officinarum	HINAHINA	WD1-SC-12-12	US	United States
SAC0455	hybrid	OGLES SELECTION	WD1-SC-12-14	South Africa	South Africa Kwazulu-natal
SAC0456	hybrid	P 57-150-4	WD1-SC-12-16	Cuba	Cuba
SAC0457	hybrid	POJ 2753	WD1-SC-12-23	Indonesia	Indonesia Java
SAC0458	officinarum	HORNE	WD1-SC-12-24	Barbados	Barbados
SAC0459	hybrid	PR 0980	WD1-SC-12-25	Puerto Rico	Puerto Rico
SAC0460	robustum	IJ 76-414	WD1-SC-12-26	Barbados	Barbados
SAC0461	robustum	NG 28-251	WD1-SC-12-28	Guadeloupe	Guadeloupe
SAC0465	robustum	NG 77-021	WD1-SC-12-34	Guadeloupe	Guadeloupe
SAC0466	unknown	CG 97-100	WD1-SC-12-36	Guatemala	Guatemala
SAC0467	hybrid	D 158/41	WD1-SC-13-01	Guyana	Guyana
SAC0468	edule	IJ 76-375	WD1-SC-13-02	Indonesia	Indonesia
SAC0469	officinarum	AKOKI 22	WD1-SC-13-03	US	United States Hawaii
SAC0470	officinarum	UAHI A PELE 50	WD1-SC-13-04	US	United States Hawaii
SAC0471	sinense	AGOULE	WD1-SC-13-05	India	India Tamil Nadu
SAC0472	sinense	UBA, NAQUIN	WD1-SC-13-06	US	United States Hawaii
SAC0473	unknown	UNKNOWN (1995: R65-P25)	WD1-SC-13-07	Unknown	Unknown
SAC0474	robustum	NG 77-39	WD1-SC-13-08	Barbados	Barbados
SAC0475	unknown	UNKNOWN (1995: R37-PO46)	WD1-SC-13-10	Unknown	Unknown
SAC0476	unknown	UNKNOWN	WD1-SC-13-11	Unknown	Unknown
SAC0477	hybrid	PT 33-0085	WD1-SC-13-14	Guam	Guam
SAC0478	officinarum	BISCUIT	WD1-SC-13-17	Guadeloupe	Guadeloupe
SAC0479	officinarum	BISCUIT	WD1-SC-13-18	Guadeloupe	Guadeloupe
SAC0480	robustum	IN 81-014	WD1-SC-13-19	Barbados	Barbados
SAC0481	robustum	MOL 6077	WD1-SC-13-20	US	United States Hawaii
SAC0482	unknown	UNKNOWN 43-167	WD1-SC-13-21	Unknown	Unknown
SAC0484	unknown	CP R1 X P1	WD1-SC-13-22Anorth	Unknown	Unknown
SAC0485	robustum	IN 81-014	WD1-SC-13-25Bsouth	Barbados	Barbados
SAC0487	unknown	CPCL 99-1401	WD1-SC-13-27	Unknown	Unknown
SAC0488	unknown	CP 45-1198	WD1-SC-13-28	Unknown	Unknown
SAC0489	robustum	IJ 76-435	WD1-SC-13-30	Indonesia	Indonesia
SAC0490	robustum	FIJI 1	WD1-SC-13-32	Australia	Australia Queensland
SAC0491	edule	IJ 76-375	WD1-SC-13-34	Indonesia	Indonesia
SAC0492	officinarum	HC 71	WD1-SC-14-02	US	United States
SAC0493	unknown	KT 730	WD1-SC-14-03	US	United States Hawaii
SAC0494	officinarum	UB 14	WD1-SC-14-04	US	United States Maryland
SAC0495	unknown	UBA IPORANGA	WD1-SC-14-05	Brazil	Brazil
SAC0496	unknown	UNKNOWN (1995: R65-P41)	WD1-SC-14-06	Unknown	Unknown
SAC0497	unknown	MOL 6446	WD1-SC-14-08	US	United States Hawaii
SAC0498	unknown	UNKNOWN (1995: R65-P47)	WD1-SC-14-09	Unknown	Unknown
SAC0499	unknown	UNKNOWN (1995: R65-P57)	WD1-SC-14-13	Unknown	Unknown
SAC0500	unknown	UNKNOWN (1995: R34-P16)	WD1-SC-14-15	Unknown	Unknown
SAC0501	robustum	NG 77-21	WD1-SC-14-18	Barbados	Barbados
SAC0502	unknown	B 69691	WD1-SC-14-19	Unknown	Unknown
SAC0503	unknown	B 70713	WD1-SC-14-20	Unknown	Unknown
SAC0504	unknown	B 73348	WD1-SC-14-21	Unknown	Unknown
SAC0505	officinarum	BADILA	WD1-SC-14-23	Unknown	Unknown
SAC0506	unknown	CO 0727	WD1-SC-14-24	Unknown	Unknown
SAC0507	unknown	CP 73-1547	WD1-SC-14-26	US	United States
SAC0508	hybrid	CP 89-2143	WD1-SC-14-29	US	United States Louisiana
SAC0509	unknown	CP 91-555	WD1-SC-14-30	US	United States Louisiana
SAC0511	officinarum	HC 71	WD1-SC-15-04	US	United States
SAC0512	sinense	SINENSE	WD1-SC-15-06	India	India
SAC0513	sinense	NEPAL 3	WD1-SC-15-07	Nepal	Nepal
SAC0514	barberi	MESANGEN	WD1-SC-15-08	Guyana	Guyana
SAC0515	sinense	KERAH	WD1-SC-15-15	Indonesia	Indonesia Java
SAC0517	hybrid	CG04-0741	WD1-SC-15-18	Guatemala	Guatemala
SAC0518	sinense	CHINA	WD1-SC-15-20	South Africa	South Africa Kwazulu-natal
SAC0519	sinense	AGAUL	WD1-SC-15-21	South Africa	South Africa Kwazulu-natal
SAC0520	unknown	US 95-1024	WD1-SC-15-22	Unknown	Unknown
SAC0521	unknown	MOL 6125	WD1-SC-15-23	US	United States Hawaii
SAC0522	unknown	N 26-14	WD1-SC-15-25	Unknown	Unknown
SAC0523	unknown	F31-762	WD1-SC-15-26	US	United States Hawaii
SAC0524	unknown	F 31-436	WD1-SC-15-27	Unknown	Unknown
SAC0525	unknown	H 87-4319	WD1-SC-15-28	Unknown	Unknown
SAC0526	hybrid	CG04-19012	WD1-SC-15-29	Guatemala	Guatemala
SAC0527	unknown	F 177	WD1-SC-15-30	Taiwan	Taiwan
SAC0528	officinarum	UNKNOWN S. OFF.	WD1-SC-15-34	Unknown	Unknown
SAC0529	sinense	TEKCHA, OKINAWA	WD1-SC-16-01	China	China
SAC0530	unknown	UNKNOWN 68-21 (765)	WD1-SC-16-04	Unknown	Unknown
SAC0531	sinense	TANZHOU	WD1-SC-16-05	China	China Guangxi
SAC0532	sinense	LOUJE	WD1-SC-16-06	China	China Guangxi
SAC0533	sinense	YUEGSEN	WD1-SC-16-07	China	China
SAC0534	sinense	ZWINGA	WD1-SC-16-08	South Africa	South Africa Kwazulu-natal
SAC0535	unknown	UNKNOWN POINT 22 35	WD1-SC-16-10	Unknown	Unknown
SAC0536	hybrid	CR 67400	WD1-SC-16-13	Unknown	Unknown
SAC0537	unknown	UNKNOWN	WD1-SC-16-16	Unknown	Unknown
SAC0538	officinarum	BA 11569	WD1-SC-16-18	Barbados	Barbados
SAC0539	hybrid	M 093/48	WD1-SC-16-19	Mauritius	Mauritius
SAC0540	hybrid	H 83-6147	WD1-SC-16-20	US	United States Hawaii
SAC0541	hybrid	M 93/48	WD1-SC-16-21	Mauritius	Mauritius
SAC0542	hybrid	CG04-09694	WD1-SC-16-23	Guatemala	Guatemala
SAC0543	hybrid	CG02-064	WD1-SC-16-24	Guatemala	Guatemala
SAC0544	hybrid	CG03-240	WD1-SC-16-25	Guatemala	Guatemala
SAC0545	hybrid	CG04-09514	WD1-SC-16-26	Guatemala	Guatemala
SAC0546	hybrid	CG04-09543	WD1-SC-16-28	Guatemala	Guatemala
SAC0547	hybrid	UNKNOWN SAC. HYBRID	WD1-SC-16-30	Unknown	Unknown
SAC0548	unknown	NG 77-083	WD1-SC-16-32	Brazil	Brazil
SAC0551	unknown	MOL 6427	WD1-SC-17-05	US	United States Hawaii
SAC0552	unknown	CP 01-1372	WD1-SC-17-11	US	United States Florida
SAC0553	unknown	CP 01-1372	LH	US	United States Florida
SAC0554	unknown	CP 00-1446	WD1-SC-17-13	US	United States Florida
SAC0555	unknown	CP 92-1666	WD1-SC-17-14	US	United States
SAC0556	hybrid	CG04-10295	WD1-SC-17-18	Guatemala	Guatemala
SAC0557	unknown	PR 75138	WD1-SC-17-19	Unknown	Unknown
SAC0558	unknown	NG 26-011	WD1-SC-17-20	Unknown	Unknown
SAC0559	unknown	UNKNOWN	WD1-SC-17-22	Unknown	Unknown
SAC0561	hybrid	CP 65-0357	GH	US	United States Louisiana
SAC0562	unknown	UNKNOWN	WD1-SC-17-29	Unknown	Unknown
SAC0563	unknown	UNKNOWN 1995 R65-P38	WD1-SC-17-31	Unknown	Unknown
SAC0564	unknown	UNKNOWN 1995 R55 P36	WD1-SC-17-32	Unknown	Unknown
SAC0565	unknown	UNKNOWN	WD1-SC-17-33	Unknown	Unknown
SAC0566	unknown	UNKNOWN 1995 R 65 P34	WD1-SC-17-34	Unknown	Unknown
SAC0567	unknown	UNKNOWN 1995 R37 P042	WD1-SC-17-35	Unknown	Unknown
SAC0568	hybrid	R570	WD1-SC-18-02	Unknown	Reunion
SAC0569	unknown	MOL 6427	WD1-SC-18-03	US	United States Hawaii
SAC0570	unknown	ISD 20	WD1-SC-18-04	Bangladesh	Bangladesh
SAC0571	unknown	RF 84-106	WD1-SC-18-05	Japan	Japan
SAC0572	unknown	ISD 28	WD1-SC-18-06	Bangladesh	Bangladesh
SAC0573	unknown	ISD 24	WD1-SC-18-07	Bangladesh	Bangladesh
SAC0574	unknown	CP 98-1029	WD1-SC-18-09	US	United States Florida
SAC0575	unknown	RHEQ	WD1-SC-18-10	Unknown	Unknown
SAC0576	unknown	ISD 25	WD1-SC-18-11	Bangladesh	Bangladesh
SAC0577	officinarum	CHINO	WD1-SC-18-12	US	United States Hawaii
SAC0578	unknown	MEX 85-6196	WD1-SC-18-13	Mexico	Mexico
SAC0579	unknown	IM 76-249	WD1-SC-18-18	Brazil	Brazil
SAC0580	barberi	HEMJA	WD1-SC-18-30	US	United States Hawaii
SAC0581	barberi	DARK PINDARIA	WD1-SC-18-31	India	India Tamil Nadu
SAC0582	hybrid	B 60321	WD1-SC-18-34	Barbados	Barbados
SAC0583	hybrid	R 397	WD1-SC-18-35	India	India
SAC0584	hybrid	CO 270	WD1-SC-19-01	India	India Tamil Nadu
SAC0585	hybrid	NCO 310	WD1-SC-19-04	South Africa	South Africa Kwazulu-natal
SAC0586	unknown	7628	WD1-SC-19-05	Unknown	Unknown
SAC0587	unknown	CP 01-1372	WD1-SC-19-09	US	United States Florida
SAC0588	hybrid	CP 89-2143	WD1-SC-19-10	US	United States Louisiana
SAC0589	unknown	CP 94-0150	WD1-SC-19-12	Unknown	Unknown
SAC0590	unknown	L 03-371	WD1-SC-19-13	US	United States Louisiana
SAC0591	hybrid	UNKNOWN SAC. HYBRID	WD1-SC-19-15	Unknown	Unknown
SAC0592	unknown	CRIANA	WD1-SC-19-17	Unknown	Unknown
SAC0593	hybrid	CG02-163	WD1-SC-19-18	Guatemala	Guatemala
SAC0594	robustum	NG 57-024	WD1-SC-19-20	US	United States
SAC0595	robustum	NG 77-21	WD1-SC-19-23	Barbados	Barbados
SAC0596	robustum	NG 57 055	WD1-SC-19-25	Papua New Guinea	Papua New Guinea
SAC0597	unknown	CPSG-3481	WD1-SC-19-27	Pakistan	Pakistan
SAC0598	robustum	NG 57-238	WD1-SC-19-32	Barbados	Barbados
SAC0599	robustum	NG 77-54	WD1-SC-19-35	Barbados	Barbados
SAC0600	hybrid	POJ 3016	WD1-SC-19-36	Indonesia	Indonesia
SAC0601	robustum	IJ 76-480	WD1-SC-19-37	Barbados	Barbados
SAC0602	robustum	IJ 76-480	WD1-SC-19-38	Barbados	Barbados
SAC0603	unknown	B35-9	WD1-SC-20-01	Unknown	Unknown
SAC0604	unknown	DB 58661	WD1-SC-20-03	Unknown	Unknown
SAC0605	hybrid	F 154	WD1-SC-20-04	Taiwan	Taiwan
SAC0606	unknown	F-159	WD1-SC-20-05	Unknown	Unknown
SAC0607	unknown	UNKNOWN	WD1-SC-20-07	Unknown	Unknown
SAC0608	unknown	F31-762	WD1-SC-20-08	US	United States Hawaii
SAC0609	hybrid	FALSA CRISTALINA	WD1-SC-20-10	Brazil	Brazil Pernambuco
SAC0611	unknown	R567	WD1-SC-20-12	Unknown	Unknown
SAC0612	unknown	KAYANA 10	WD1-SC-20-14	Unknown	Unknown
SAC0613	sinense	CHUK CHE	WD1-SC-20-15	China	China Guangdong
SAC0614	sinense	KAVANGIRE	WD1-SC-20-19	Argentina	Argentina Tucuman
SAC0615	sinense	MANEIRA	WD1-SC-20-22	India	India
SAC0616	sinense	MCILKRUM	WD1-SC-20-23	US	United States Maryland
SAC0617	unknown	UNKNOWN 71-20	WD1-SC-20-24	Unknown	Unknown
SAC0618	unknown	MORTHI	WD1-SC-20-25	Unknown	Unknown
SAC0619	sinense	MERTHI	WD1-SC-20-26	India	India Uttar Pradesh
SAC0620	sinense	MERTHI ZELL	WD1-SC-20-27	Cuba	Cuba La Habana
SAC0621	sinense	OSHIMA	WD1-SC-20-29	Japan	Japan
SAC0622	sinense	NEPAL 3	WD1-SC-20-31	Nepal	Nepal
SAC0623	officinarum	MANJRI RED	WD1-SC-20-32	Barbados	Barbados
SAC0624	unknown	POJ028	WD1-SC-20-33	Unknown	Unknown
SAC0625	robustum	NG 77-021	WD1-SC-20-34	Guadeloupe	Guadeloupe
SAC0626	unknown	UNKNOWN 1995: R43 PO25	WD1-SC-21-01	Unknown	Unknown
SAC0627	barberi	KHATUIA	WD1-SC-21-04	India	India Tamil Nadu
SAC0628	barberi	KUSWAR	WD1-SC-21-05	India	India Tamil Nadu
SAC0629	barberi	MANGWA	WD1-SC-21-06	India	India Tamil Nadu
SAC0631	barberi	SONABILE	WD1-SC-21-15	India	India Tamil Nadu
SAC0632	barberi	TERERU	WD1-SC-21-16	India	India Tamil Nadu
SAC0633	hybrid	CP 70-1133	WD1-SC-21-18	US	United States Florida
SAC0634	hybrid	CP 36-0105	WD1-SC-21-20	US	Uinted States Florida
SAC0635	hybrid	CO 313	WD1-SC-21-23	South Africa	South Africa
SAC0636	hybrid	CO 312	WD1-SC-21-24	South Africa	South Africa
SAC0637	hybrid	B54-142	WD1-SC-21-26	Barbados	Barbados
SAC0638	officinarum	BA 11569	WD1-SC-21-27	Barbados	Barbados
SAC0639	hybrid	PB 52-1-1	WD1-SC-21-32	Myanmar	Myanmar
SAC0640	hybrid	POJ 2725	WD1-SC-21-33	Indonesia	Indonesia
SAC0641	unknown	UNKNOWN	WD1-SC-21-34	Unknown	Unknown
SAC0642	unknown	UNKNOWN 1995: R65 P25	WD1-SC-21-35	Unknown	Unknown
SAC0643	unknown	TCP 93-4245	WD1-SC-21-36	US	United States Texas
SAC0644	unknown	7628	WD1-SC-21-37	Unknown	Unknown
SAC0645	unknown	DON CICO	WD1-SC-21-38	Unknown	Unknown
SAC0646	sinense	TANZHOU	WD1-SC-22-01	China	China Guangxi
SAC0647	sinense	JAPONESA	WD1-SC-22-03	Costa Rica	Costa Rica Cartago
SAC0651	sinense	MANKIA	WD1-SC-22-19	India	India Tamil Nadu
SAC0652	unknown	UNKNOWN (1995: R65-P38)	WD1-SC-22-23	Unknown	Unknown
SAC0653	unknown	CP 91-555	GH (T14)	US	United States Louisiana
SAC0654	unknown	UNKNOWN R 56 P 28	WD1-SC-22-33	Unknown	Unknown
SAC0655	hybrid	US 71-53-01	WD1-SC-22-35	Taiwan	Taiwan
SAC0656	sinense	AGOULE	WD1-SC-22-36	India	India Tamil Nadu
SAC0657	hybrid	US 71-53-01	WD1-SC-22-37	Taiwan	Taiwan
SAC0658	hybrid	VOMA	WD1-SC-22-38	Unknown	Unknown
SAC0659	officinarum	IJ 76-478	FSN 1 (R7)	Indonesia	Indonesia
SAC0660	officinarum	IJ 76-324	GH 1 (T18), 1 (T24)	Indonesia	Indonesia
SAC0661	hybrid	R 570	GH 1 (T24)	Unknown	Reunion
SAC0662	robustum	NG 77-054	GH 2 (T21)	Papua New Guinea	Papua New Guinea Or Guadeloupe
SAC0663	officinarum	NG 21-049	GH 1 (T18), 1 (T24)	Papua New Guinea	Papua New Guinea
SAC0664	officinarum	IJ 76-477	LH 2 (T2)	Barbados	Barbados
SAC0665	hybrid	Diamond 10	LH 2 (T5)	Barbados	Barbados
SAC0666	unknown	DB 420/60	LH 1 (T5)	Unknown	Unknown
SAC0667	robustum	NG 77-159	GH 3 (T14)	Papua New Guinea	Papua New Guinea
SAC0668	hybrid	M 147/44	LH 2 (T5)	India	India
SAC0669	unknown	TCP 87-3388	LH 1 (T3)	US	United States
SAC0670	barberi	Kinar	LH 2 (T1)	India	India Uttar Pradesh
SAC0671	robustum	MOL 6091	GH 1 (T18), 1 (T24)	US	United States Hawaii
SAC0672	barberi	Khari	FSN 1 (R8)	India	India Tamil Nadu
SAC0673	barberi	Matki Mango	LH 3 (T1)	India	India Tamil Nadu
SAC0674	hybrid	CP 72-0370	FSN 1 (R2), 1 (R8)	US	United States Louisiana
SAC0675	officinarum	NG 57 095	GH 1 (pot on ground)	Unknown	Unknown
SAC0676	officinarum	NG 51 97	LH (T5)	Unknown	Unknown
SAC0677	officinarum	CL 41-0223	FSN	Unknown	Unknown
SAC0679	unknown	BS 3058/BSN 3058	GH 1 (T18)	Unknown	Unknown
SAC0681	hybrid	US 71-0501	GH 1 (T24)	Unknown	Unknown
SAC0683	officinarum	CO 290	GH 2 (T14)	Unknown	Unknown
SAC0684	hybrid	B 49119	GH 2 (T14), 1 (pot on gournd)	Unknown	Unknown
SAC0685	unknown	Ragnar	GH 2 (T21)	Unknown	Unknown
SAC0686	barberi	Rakhra	GH 2 (T22)	Unknown	Unknown
SAC0687	robustum	M 3035/66	GH 2 (T22)	Unknown	Unknown
SAC0689	robustum	IM 76-228	GH 2 (T22)	Unknown	Unknown
SAC0690	robustum	IN 84-076	GH 2 (T22)	Unknown	Unknown
SAC0691	hybrid	COS 510	GH 2 (T22), 1 (pot on ground)	Unknown	Unknown
SAC0692	hybrid	CG04-09615	GH 2 (T24)	Unknown	Unknown
SAC0693	unknown	CP 91-055	GH 3 (R20) (WD1-SC-22-34 - dead)	Unknown	Unknown
SAC0694	hybrid	BO 14	GH 3 (T14)	Unknown	Unknown
SAC0695	edule	IJ 76-337	GH 3 (T14)	Unknown	Unknown
SAC0696	unknown	M 2350/79	GH 3 (T22)	Unknown	Unknown
SAC0697	robustum	IN 84-050	GH 3 (T22)	Unknown	Unknown
SAC0698	hybrid	POJ 2803	GH 3 (T22), 1 (pot on ground)	Unknown	Unknown
SAC0699	robustum	NG 77-147	GH 3 (T22), 3 (T14)	Unknown	Unknown
SAC0700	hybrid	B 54142	LH 1 (T2)	Unknown	Unknown
SAC0701	robustum	IS 76-184	LH 1 (T2)	Unknown	Unknown
SAC0702	hybrid	UCW 54-63	LH 1 (T3)	Unknown	Unknown
SAC0703	unknown	HoCp 96-540	LH 1 (T3)	Unknown	Unknown
SAC0704	officinarum	Q 050	LH 1 (T3)	Unknown	Unknown
SAC0706	unknown	F 31-762	LH 1 (T3)	Unknown	Unknown
SAC0707	hybrid	CO 0997	LH 1 (T3)	Unknown	Unknown
SAC0708	robustum	Molokai 5099	LH 1 (T5)	Unknown	Unknown
SAC0709	hybrid	Q 96	LH 1 (T5)	Unknown	Unknown
SAC0711	sinense	Uba Striped	LH 1 (T5)	Unknown	Unknown
SAC0712	officinarum	NG 51-192	LH 1 (T5)	Unknown	Unknown
SAC0714	hybrid	CO 0975	LH 1 (T5)	Unknown	Unknown
SAC0715	officinarum	NG 57-59	LH 1 (T5)	Unknown	Unknown
SAC0716	unknown	BALL 569	FSN	Unknown	Unknown
SAC0717	barberi	Baroukha 239	LH 2 (T1)	Unknown	Unknown
SAC0718	barberi	Khari	LH 2 (T1)	Unknown	Unknown
SAC0719	barberi	Nargori	LH 2 (T1)	Unknown	Unknown
SAC0721	officinarum	Halalii	LH 2 (T2)	Unknown	Unknown
SAC0722	barberi	New Siberian (Paunra)	LH 2 (T2)	Unknown	Unknown
SAC0725	robustum	US 57-159-13	LH 2 (T2)	Unknown	Unknown
SAC0727	sinense	Tanzhou Bamboo Cane	LH 2 (T5)	Unknown	Unknown
SAC0728	hybrid	M 63/39	LH 2 (T6)	Unknown	Unknown
SAC0729	sinense	Baroukha	LH 3 (T1)	Unknown	Unknown
SAC0730	barberi	Newra	LH 3 (T1)	Unknown	Unknown
SAC0731	barberi	Pathri	LH 3 (T1)	Unknown	Unknown
SAC0732	barberi	White Pararia	LH 3 (T2)	Unknown	Unknown
SAC0733	unknown	CO 6304	LH 3 (T3)	Unknown	Unknown
SAC0734	officinarum	SS 60-001 (CATO)	LH 3 (T5)	Unknown	Unknown
SAC0735	officinarum	Uba Del Natal	LH 3 (T5)	Unknown	Unknown
SAC0737	unknown	HoCp 85-845	LH 3 (T6)	Unknown	Unknown
SAC0738	officinarum	57 NG-14	LH 3 (T6)	Unknown	Unknown
SAC0739	sinense	Gungera	FSN 1 (R10)	Unknown	Unknown
SAC0740	robustum	IM 76-232	FSN 1 (R10)	Unknown	Unknown
SAC0742	unknown	ISD 31	FSN 1 (R12)	Unknown	Unknown
SAC0743	unknown	CO 6502	FSN 1 (R12)	Unknown	Unknown
SAC0744	robustum	IN 84-052	FSN 1 (R12)	Unknown	Unknown
SAC0746	hybrid	H 38-2915	FSN 1 (R3)	Unknown	Unknown
SAC0748	unknown	Q 5-457	FSN 1 (R7)	Unknown	Unknown
SAC0749	sinense	Tekcha	FSN 1 (R8)	Unknown	Unknown
SAC0753	hybrid	CO 0453	FSN 2 (R2)	Unknown	Unknown
SAC0754	hybrid	CP 66-0346	FSN 2 (R2)	Unknown	Unknown
SAC0755	hybrid	POJ 2354	FSN 2 (R3), 2 (R5)	Unknown	Unknown
SAC0756	hybrid	CO 0475	FSN 2 (R4)	Unknown	Unknown
SAC0757	officinarum	IJ 76-477 IJ 76-447 on pot	FSN 2 (R7)	Unknown	Unknown
SAC0758	unknown	F 31-407	FSN 2 (R8)	Unknown	Unknown
SAC0759	officinarum	NG 77-234	FSN 2 (R8)	Unknown	Unknown
SAC0760	sinense	Cayana 10	FSN 2 (R9)	Unknown	Unknown
SAC0762	unknown	IJ 76-426	FSN 3 (R10)	Unknown	Unknown
SAC0763	robustum	NG 77-107	FSN 3 (R11)	Unknown	Unknown
SAC0764	hybrid	CP 48-0103	FSN 3 (R2)	Unknown	Unknown
SAC0765	hybrid	Q 064	FSN 3 (R3)	Unknown	Unknown
SAC0766	hybrid	M 555/60	FSN 3 (R3)	Unknown	Unknown
SAC0767	unknown	US 67-037-01	FSN 3 (R4)	US	Us 67-037-01
SAC0768	hybrid	CR 00440	FSN 3 (R6)	Unknown	Cr 00440
SAC0769	unknown	RSB 90-22	FSN 3 (R8)	Unknown	Rsb 90-22
SAC0770	hybrid	CO 0331	FSN 4 (R2)	Unknown	Co 0331
SAC0771	hybrid	SP 70-1143	FSN 4 (R4)	Unknown	Sp 70-1143
SAC0772	robustum	MOL 45 003	FSN 6 (R6)	Unknown	Mol 45 003
SAC0777	narenga	US 58-0004-01; -02	WD1-SC-37-11	India	India Tamil Nadu
SAC0789	spontaneum	78-2-1+2+3	WD1-SC-37-31	Barbados	Barbados
SAC0790	spontaneum	US 56-0019-01; -03	WD1-SC-37-32	Thailand	Thailand
SAC0791	spontaneum	US 56-0008-02	WD1-SC-37-33	Thailand	Thailand
SAC0793	spontaneum	US 57-172-3	WD1-SC-37-36	Barbados	Barbados
SAC0794	unknown	CPGN 84-2-9678	WD1-SC-37-37	Pakistan	Pakistan
SAC0795	spontaneum	Pasuruan	WD1-SC-37-38	Barbados	Barbados
SAC0797	spontaneum	IK 76-74	WD1-SC-37-40	Barbados	Barbados
SAC0798	spontaneum	IS 76-201	WD1-SC-37-41	Barbados	Barbados
SAC0814	spontaneum	US 57-11-2	WD1-SC-37-69	Barbados	Barbados
SAC0815	spontaneum	WI 80-2-1	WD1-SC-37-70	Barbados	Barbados
SAC0816	spontaneum	IND 81-80	WD1-SC-37-72	India	India Tamil Nadu
SAC0830	spontaneum	51 NG 88	WD1-SC-37-77	Barbados	Barbados
SAC0831	spontaneum	Map_Min	WD1-SC-37-81	Barbados	Barbados
SAC0832	spontaneum	PBg 84-5	WD1-SC-37-82	Philippines	Philippines
SAC0833	spontaneum	Taiwan 11	WD1-SC-37-83	Unknown	Unknown
SAC0834	spontaneum	PCaV 84-5	WD1-SC-37-84	Philippines	Philippines
SAC0835	spontaneum	PCaV 84-6	WD1-SC-37-87	Unknown	Unknown
SAC0850	spontaneum	51 NG 25	WD1-SC-37-88	Barbados	Barbados
SAC0851	spontaneum	WI 87-1-1+2	WD1-SC-37-89	Barbados	Barbados
SAC0852	spontaneum	Panama	WD1-SC-37-90	Barbados	Barbados
SAC0853	spontaneum	75-3-1,5,7	WD1-SC-37-91	Barbados	Barbados
SAC0854	spontaneum	IN 84-091	WD1-SC-37-92	Barbados	Barbados
SAC0855	spontaneum	NG US 56-19-3	WD1-SC-37-93	Barbados	Barbados
SAC0856	spontaneum	Kloet	WD1-SC-37-94	Barbados	Barbados
SAC0857	spontaneum	SES 091	WD1-SC-37-95	Guadeloupe	Guadeloupe
SAC0858	spontaneum	Aegypticum	WD1-SC-37-96	Barbados	Barbados
SAC0859	spontaneum	S.B.	WD1-SC-37-97	Barbados	Barbados
SAC0860	spontaneum	US 59-0001-01	WD1-SC-37-99	Philippines	Philippines
SAC0861	spontaneum	Kawanda	WD1-SC-37-98	Barbados	Barbados
SAC0862	spontaneum	US 56-19-1	WD1-SC-37-100	Barbados	Barbados
SAC0863	spontaneum	IK 76-71	WD1-SC-37-101	Barbados	Barbados
SAC0864	spontaneum	B 68264	WD1-SC-37-102	Barbados	Barbados
SAC0865	spontaneum	76-1-7+8+9	WD1-SC-37-103	Barbados	Barbados
SAC0866	spontaneum	CO_Local	WD1-SC-37-104	Barbados	Barbados
SAC0867	spontaneum	B 68269	WD1-SC-37-105	Barbados	Barbados
SAC0868	spontaneum	Spont 14095	WD1-SC-37-106	Unknown	Unknown
SAC0869	spontaneum	BB spont #1	WD1-SC-37-107	Unknown	Unknown
SAC0870	unknown	US 56-15-1	WD1-SC-37-108	Pakistan	Pakistan
SAC0871	unknown	Sing 80	WD1-SC-37-109	Unknown	Unknown
SAC0872	spontaneum	IS 76-177	WD1-SC-37-110	Barbados	Barbados
SAC0873	spontaneum	IN 84-013	WD1-SC-37-136	Unknown	Unknown
SAC0940	spontaneum	Spont 43-60	WD1-SC-37-175	Unknown	Unknown
SAC0941	spontaneum	SES 519	WD1-SC-37-176	Unknown	Unknown
SAC0944	spontaneum	IJ 76-125	WD1-SC-39-07	Unknown	Unknown
SAC0946	spontaneum	IJ 76-421	WD1-SC-39-10	Unknown	Unknown
SAC0948	spontaneum	IN 84-35	WD1-SC-39-15	Unknown	Unknown
SAC0949	spontaneum	IN 84-39	WD1-SC-39-17	Brazil	Brazil
SAC095	officinarum	Old Java	WD1-SC-01-13	Virgin Islands	Virgin Islands
SAC0950	spontaneum	IND 81-7	WD1-SC-39-21	India	India Tamil Nadu
SAC0951	spontaneum	IND 81-013	WD1-SC-39-22	India	India
SAC0952	spontaneum	IND 81-16	WD1-SC-39-23	Unknown	Unknown
SAC0953	spontaneum	IND 81-30	WD1-SC-39-24	India	India
SAC0954	spontaneum	IND 81-38	WD1-SC-39-25	India	India
SAC0955	spontaneum	IND 81-43	WD1-SC-39-26	India	India Tamil Nadu
SAC0956	spontaneum	IND 81-55	WD1-SC-39-27	India	India Tamil Nadu
SAC0957	spontaneum	IND 81-074	WD1-SC-39-29	India	India Tamil Nadu
SAC0958	spontaneum	IND 81-81	WD1-SC-39-30	India	India Tamil Nadu
SAC0959	spontaneum	IND 81-86	WD1-SC-39-32	India	India Tamil Nadu
SAC096	officinarum	Chino	WD1-SC-01-20	US	Hawaii
SAC0960	spontaneum	IND 81-101	WD1-SC-39-33	India	India Tamil Nadu
SAC0961	spontaneum	IND 81-119	WD1-SC-39-34	India	India Tamil Nadu
SAC0962	spontaneum	IND 81-122	WD1-SC-39-35	India	India
SAC0963	spontaneum	IND 81-132	WD1-SC-39-37	Unknown	Unknown
SAC0964	spontaneum	IND 81-136	WD1-SC-39-38	Unknown	Unknown
SAC0965	spontaneum	IND 81-138	WD1-SC-39-39	India	India Tamil Nadu
SAC0966	spontaneum	IND 81-143	WD1-SC-39-40	Unknown	Unknown
SAC0967	spontaneum	IND 81-164	WD1-SC-39-44	India	India Tamil Nadu
SAC0968	spontaneum	IND 81-170	WD1-SC-39-45	India	India Tamil Nadu
SAC0969	spontaneum	IND 81-180	WD1-SC-39-48	India	India Tamil Nadu
SAC097	unknown	Cana Gorda	WD1-SC-01-27	Unknown	Unknown
SAC0970	spontaneum	IND 81-191	WD1-SC-39-49	Unknown	Unknown
SAC0971	spontaneum	IND 82-318	WD1-SC-39-53	Unknown	Unknown
SAC0972	spontaneum	IS 76-125	WD1-SC-39-56	Indonesia	Indonesia
SAC0973	spontaneum	IS 76-173	WD1-SC-39-59	Indonesia	Indonesia
SAC0976	spontaneum	MOL 1032	WD1-SC-39-63	Unknown	Unknown
SAC0977	spontaneum	MQ 60 1953	WD1-SC-39-64	Unknown	Unknown
SAC0978	spontaneum	NG 51-025	WD1-SC-39-68	Papua New Guinea	Papua New Guinea
SAC098	officinarum	Green German	WD1-SC-01-30	India	India
SAC0980	spontaneum	Okinawa No. 13	WD1-SC-39-72	Unknown	Unknown
SAC0981	spontaneum	IK 76-66	WD1-SC-39-73	Barbados	Barbados
SAC0982	spontaneum	PBG 84-7	WD1-SC-39-76	Philippines	Philippines
SAC0984	spontaneum	PCA NOR 84-03	WD1-SC-39-79	Philippines	Philippines
SAC0985	spontaneum	PCA NOR 84-4	WD1-SC-39-80	Brazil	Brazil
SAC0986	spontaneum	PCA NOR 84-6	WD1-SC-39-81	Philippines	Philippines
SAC0987	spontaneum	PCA SUR 84-1	WD1-SC-39-82	Philippines	Philippines
SAC0988	spontaneum	PCA SUR 84-3	WD1-SC-39-83	Philippines	Philippines
SAC0989	spontaneum	PCAV 84-06	WD1-SC-39-89	Brazil	Brazil
SAC099	unknown	Tall Ribbon	WD1-SC-01-34	Unknown	Unknown
SAC0990	spontaneum	PPGN 84-05	WD1-SC-39-93	Philippines	Philippines
SAC0991	spontaneum	PQ 84-9	WD1-SC-39-95	Philippines	Philippines
SAC0992	spontaneum	S 66-101	WD1-SC-39-97	Taiwan	Taiwan
SAC0993	spontaneum	S. spont # 02	WD1-SC-39-98	Unknown	Unknown
SAC0995	spontaneum	S. spont # 17	WD1-SC-39-103	Unknown	Unknown
SAC0996	spontaneum	S. spont # 27	WD1-SC-39-108	Unknown	Unknown
SAC0997	spontaneum	S. spont # 28	WD1-SC-39-109	Unknown	Unknown
SAC0998	spontaneum	S. spont # 30	WD1-SC-39-110	Unknown	Unknown
SAC0999	spontaneum	S. spont Iran	WD1-SC-39-113	Unknown	Unknown
SAC100	officinarum	Javari Kabbu	WD1-SC-02-04	Unknown	Unknown
SAC1000	spontaneum	SES 092	WD1-SC-39-116	India	India
SAC1001	spontaneum	SES 184B	WD1-SC-39-119	India	India
SAC1002	spontaneum	SES 196	WD1-SC-39-120	Brazil	Brazil
SAC1003	spontaneum	SES 208	WD1-SC-39-121	India	India
SAC1004	spontaneum	SES 231	WD1-SC-39-122	India	India
SAC1005	unknown	SES 269	WD1-SC-39-123	India	India
SAC1006	spontaneum	SES 275	WD1-SC-39-124	India	India
SAC1007	spontaneum	SES 295	WD1-SC-39-126	India	India
SAC1008	spontaneum	SES 297B	WD1-SC-39-128	India	India
SAC1009	spontaneum	SES 513	WD1-SC-39-131	India	India
SAC101	officinarum	Iscambine	WD1-SC-02-05	Mauritius	Mauritius
SAC1010	spontaneum	SES 606	WD1-SC-39-136	India	India
SAC1011	spontaneum	SES 084/58	WD1-SC-39-137	India	India Tamil Nadu
SAC1012	spontaneum	SM 7916	WD1-SC-39-138	Unknown	Unknown
SAC1013	spontaneum	Shoaguan	WD1-SC-39-140	China	China
SAC1014	spontaneum	THA 82-4	WD1-SC-39-141	Thailand	Thailand
SAC1015	spontaneum	THA 82-60	WD1-SC-39-143	Thailand	Thailand
SAC1016	spontaneum	THA 83-011	WD1-SC-39-145	Unknown	Unknown
SAC1017	spontaneum	THA 83-149	WD1-SC-39-147	Unknown	Unknown
SAC1018	spontaneum	THA 83-171	WD1-SC-39-148	Thailand	Thailand
SAC1019	spontaneum	Tainan 2n=096	WD1-SC-39-150	Guam	Guam
SAC102	officinarum	Q 058	WD1-SC-02-10	Australia	Queensland Australia
SAC1020	spontaneum	Taiwan Spont 002	WD1-SC-39-151	Taiwan	Taiwan
SAC1021	spontaneum	Tongza	WD1-SC-39-154	China	China
SAC1022	spontaneum	US 56-13-7	WD1-SC-39-155	Thailand	Thailand
SAC1023	spontaneum	US 56-15-08	WD1-SC-39-156	Thailand	Thailand
SAC1024	spontaneum	US 58-0004-01	WD1-SC-39-158	Unknown	Unknown
SAC1025	spontaneum	US 60-0004-004; -06	WD1-SC-39-159	Afghanistan	Afghanistan
SAC1026	hybrid	US 74-0069	WD1-SC-39-160	Unknown	Unknown
SAC1027	spontaneum	US 78-506	WD1-SC-39-161	Pakistan	Pakistan North-west Frontier
SAC1028	spontaneum	US 78-511	WD1-SC-39-163	Pakistan	Pakistan
SAC1029	spontaneum	Yacheng 12	WD1-SC-39-164	China	China
SAC103	officinarum	Ik 76-060	WD1-SC-02-16	Unknown	Unknown
SAC1030	spontaneum	Yunnan	WD1-SC-39-165	China	China Guangxi
SAC1031	spontaneum	PPGN 84-8	WD1-SC-39-169	Unknown	Unknown
SAC1032	spontaneum	PQ 84-4	WD1-SC-39-170	Philippines	Philippines
SAC1033	spontaneum	P-Sor-84-13	WD1-SC-39-171	Philippines	Philippines
SAC1034	spontaneum	SES 113A	WD1-SC-39-172	India	India
SAC1035	spontaneum	SES 147B	WD1-SC-39-173	India	India
SAC1036	spontaneum	SES 205A	WD1-SC-39-174	India	India
SAC1037	spontaneum	IN 76-086	WD1-SC-39-176	Unknown	Unknown
SAC1038	spontaneum	SES 197A	WD1-SC-39-177	India	India
SAC1039	spontaneum	Burma	WD1-SC-41-02	India	India Tamil Nadu
SAC104	officinarum	Ik 76-059	WD1-SC-02-17	Australia	Brisbane Australia
SAC1040	spontaneum	Dacca	WD1-SC-41-04	India	India
SAC1041	spontaneum	Formosa No. 4	WD1-SC-41-07	Taiwan	Taiwan
SAC1042	spontaneum	Gehra-Bon	WD1-SC-41-08	India	India Tamil Nadu
SAC1043	spontaneum	Gugu	WD1-SC-41-10	Kenya	Kenya
SAC1044	spontaneum	IK 76-006	WD1-SC-41-13	Indonesia	Indonesia
SAC1045	spontaneum	IK 76-049	WD1-SC-41-17	US	California United States
SAC1046	spontaneum	IK 76-067	WD1-SC-41-18	US	California United States
SAC1047	spontaneum	IM 76-238	WD1-SC-41-22	Indonesia	Indonesia
SAC1048	spontaneum	IN84-009	WD1-SC-41-23	Indonesia	Indonesia
SAC1049	spontaneum	IN84-010	WD1-SC-41-24	Indonesia	Indonesia
SAC105	unknown	Us 84-1003	WD1-SC-02-18	Unknown	Unknown
SAC1050	spontaneum	IN84-011	WD1-SC-41-25	Indonesia	Indonesia
SAC1052	spontaneum	Sumatra #2	WD1-SC-41-27	Cuba	Cuba
SAC1053	spontaneum	IK 76-72	WD1-SC-41-28	Barbados	Barbados
SAC1054	spontaneum	IN 84-072	WD1-SC-41-29	Indonesia	Indonesia
SAC1055	spontaneum	IS 76-222	WD1-SC-41-32	Barbados	Barbados
SAC1057	spontaneum	IN84-069	WD1-SC-41-42	Indonesia	Indonesia
SAC1058	spontaneum	IN84-091	WD1-SC-41-46	Indonesia	Indonesia
SAC1059	spontaneum	IND 81-9	WD1-SC-41-47	India	India Tamil Nadu
SAC106	unknown	Mex 57-1285	WD1-SC-02-20	Mexico	Mexico
SAC1061	spontaneum	IND 81-131	WD1-SC-41-50	India	India Tamil Nadu
SAC1062	spontaneum	IND 81-142	WD1-SC-41-51	India	India Tamil Nadu
SAC1063	spontaneum	IND 81-144	WD1-SC-41-52	Unknown	Unknown
SAC107	officinarum	Hawaiian Original 52	WD1-SC-02-36	US	Hawaii
SAC1072	spontaneum	IS 76-154	WD1-SC-41-64	US	California United States
SAC1075	spontaneum	IS 76-196	WD1-SC-41-70	Indonesia	Indonesia
SAC1077	spontaneum	Kepandjen	WD1-SC-41-74	Indonesia	Indonesia Java
SAC1079	spontaneum	M. Moentai	WD1-SC-41-76	Indonesia	Indonesia
SAC108	officinarum	Louisiana Purple	WD1-SC-03-03	US	Maryland U.s.
SAC1082	spontaneum	Nepal	WD1-SC-41-79	Papua New Guinea	Papua New Guinea
SAC1083	spontaneum	Okinawa # 01	WD1-SC-41-84	Japan	Japan
SAC1084	spontaneum	P-Dav 84-01	WD1-SC-41-86	Philippines	Philippines
SAC1085	spontaneum	PAL-84-1	WD1-SC-41-89	Philippines	Philippines
SAC1086	spontaneum	PAL-84-4	WD1-SC-41-90	Philippines	Philippines
SAC1087	spontaneum	PAL 84-07	WD1-SC-41-92	Philippines	Philippines
SAC1088	spontaneum	PCAV 84-13	WD1-SC-41-94	Philippines	Philippines
SAC1089	spontaneum	PCAV 84-20	WD1-SC-41-96	Philippines	Philippines
SAC109	officinarum	Madera	WD1-SC-03-04	Spain	Spain
SAC1090	spontaneum	PCA NOR 84-01	WD1-SC-41-98	Philippines	Philippines
SAC1091	spontaneum	PCA NOR 84-5	WD1-SC-41-100	Philippines	Philippines
SAC1092	spontaneum	PCA SUR 84-2	WD1-SC-41-102	Philippines	Philippines
SAC1093	spontaneum	PCA SUR 84-8	WD1-SC-41-103	Philippines	Philippines
SAC1094	spontaneum	Philippine "Wild"	WD1-SC-41-104	Philippines	Philippines
SAC1095	spontaneum	Ponape Wild Slender	WD1-SC-41-106	Japan	Japan
SAC1096	spontaneum	PPGN 84-2	WD1-SC-41-107	Philippines	Philippines
SAC1098	spontaneum	PPGN 84-8	WD1-SC-41-109	Philippines	Philippines
SAC1099	spontaneum	PQ 84-3	WD1-SC-41-110	Philippines	Philippines
SAC110	officinarum	Nc 024	WD1-SC-03-12	New Caledonia	New Caledonia
SAC1100	spontaneum	PTAR 84-02	WD1-SC-41-112	Philippines	Philippines
SAC1101	spontaneum	Rellagadi	WD1-SC-41-113	India	India Tamil Nadu
SAC1102	spontaneum	S 01	WD1-SC-41-114	Bangladesh	Bangladesh
SAC1103	spontaneum	S 66-084	WD1-SC-41-115	Taiwan	Taiwan
SAC1104	spontaneum	S 66-105	WD1-SC-41-118	Taiwan	Taiwan
SAC1105	spontaneum	S 66-142	WD1-SC-41-120	Taiwan	Taiwan
SAC1107	spontaneum	SES 004A	WD1-SC-41-122	India	India
SAC1108	spontaneum	SES 014	WD1-SC-41-125	India	India
SAC1109	spontaneum	Iran spont	WD1-SC-41-127	Iran	Iran
SAC111	officinarum	Ng 21-003	WD1-SC-03-14	Unknown	Unknown
SAC1110	spontaneum	SES 033	WD1-SC-41-128	India	India Tamil Nadu
SAC1111	spontaneum	SES 060	WD1-SC-41-129	India	India
SAC1112	spontaneum	SES 080B	WD1-SC-41-133	India	India Tamil Nadu
SAC1117	spontaneum	PIN 84-1	WD1-SC-41-149	Philippines	Philippines
SAC1118	unknown	SM 8136	WD1-SC-41-150	Unknown	Unknown
SAC1119	spontaneum	Spont10	WD1-SC-41-151	Iran	Iran
SAC112	hybrid	R 469	WD1-SC-03-15	Guadeloupe	Guadeloupe
SAC1120	spontaneum	Longchuan (Yunan)	WD1-SC-41-156	China	China
SAC1121	spontaneum	Mandalay No. 1	WD1-SC-41-158	Indonesia	Indonesia
SAC1123	spontaneum	SES 316	WD1-SC-41-162	India	India Tamil Nadu
SAC1124	spontaneum	SES 014	WD1-SC-41-167	India	India
SAC1125	unknown	THA 83-14	WD1-SC-41-173	Unknown	Unknown
SAC1126	spontaneum	IND 82-257	WD1-SC-41-175	India	India
SAC1128	spontaneum	SLC.92-62	WD1-SC-41-178	Sri Lanka	Sri Lanka
SAC1129	spontaneum	SLC.92-32	WD1-SC-41-179	Sri Lanka	Sri Lanka
SAC113	officinarum	Ng 21 035	WD1-SC-03-23	Papua New Guinea	Papua New Guinea
SAC1130	spontaneum	SES 234	WD1-SC-41-182	Malaysia	Malaysia
SAC1131	unknown	IA 3135	WD1-SC-41-183	Unknown	Unknown
SAC1132	spontaneum	SLC.92-98	WD1-SC-41-184	Sri Lanka	Sri Lanka
SAC114	unknown	Vanessa	WD1-SC-03-25	Unknown	Unknown
SAC115	robustum	Ng 28-289	WD1-SC-04-09	Papua New Guinea	Papua New Guinea Or Guadeloupe
SAC1157	hybrid	H 051-9001	WD1-SC-43-55	US	United States Hawaii
SAC116	officinarum	Ng 51-105	WD1-SC-04-11	Papua New Guinea	Papua New Guinea
SAC117	officinarum	S. Off. Andrea	WD1-SC-05-12	Unknown	Unknown
SAC118	unknown	Kalaloa 2	WD1-SC-05-14	US	Hawaii
SAC119	officinarum	Ng 77-016	WD1-SC-05-21	Papua New Guinea	Papua New Guinea
SAC1198	spontaneum	US 4625	WD1-SC-43-105	Kenya	Kenya
SAC1199	spontaneum	IS 76-196	WD1-SC-43-106	Indonesia	Indonesia
SAC120	officinarum	Puri	WD1-SC-06-04	Indonesia	Indonesia
SAC1200	spontaneum	SES 073	WD1-SC-43-107	India	India Tamil Nadu
SAC1201	spontaneum	Taiwan 11	WD1-SC-43-108	Taiwan	Taiwan
SAC1202	spontaneum	IND 81-198	WD1-SC-43-109	India	India
SAC121	officinarum	Pundia	WD1-SC-06-05	Cuba	Cuba La Habana
SAC1210	spontaneum	SES 073	WD1-SC-43-120	India	India Tamil Nadu
SAC1211	spontaneum	SES 234	WD1-SC-43-121	Malaysia	Malaysia
SAC1212	spontaneum	SES 205B	WD1-SC-43-122	India	India
SAC1213	unknown	US 56-001-043	WD1-SC-43-123	Unknown	Unknown
SAC1214	spontaneum	IN84-016	WD1-SC-43-124	Indonesia	Indonesia
SAC122	robustum	Ng 77-148	WD1-SC-06-07	Barbados	Barbados
SAC1224	spontaneum	Formosa 4	WD1-SC-43-150	Barbados	Barbados
SAC1225	unknown	Q 6947108	WD1-SC-43-151	Unknown	Unknown
SAC1226	spontaneum	Tabongo	WD1-SC-43-152	Guadeloupe	Guadeloupe
SAC1227	spontaneum	Ruteng_Flo	WD1-SC-43-153	Barbados	Barbados
SAC1228	spontaneum	Longchuan (Yunan)	WD1-SC-43-155	China	China
SAC1229	unknown	MPTh 97-3	WD1-SC-43-163	Thailand	Thailand
SAC123	hybrid	Phil 6607	WD1-SC-06-15	Philippines	Philippines
SAC1232	spontaneum	SLC.92-82	WD1-SC-43-169	Sri Lanka	Sri Lanka
SAC1234	robustum	NG 57-208	WD1-SC-43-178	US	United States Hawaii
SAC1235	spontaneum	SLC.92-85	WD1-SC-43-179	Sri Lanka	Sri Lanka
SAC1237	spontaneum	SES 084/58	WD1-SC-45-01	India	India Tamil Nadu
SAC1238	spontaneum	SES 088 C	WD1-SC-45-02	India	India
SAC1239	spontaneum	SES 090	WD1-SC-45-03	India	India
SAC124	hybrid	Cg04-0587	WD1-SC-06-24	Guatemala	Guatemala
SAC1240	spontaneum	SES 092	WD1-SC-45-04	India	India
SAC1241	spontaneum	SES 103	WD1-SC-45-05	India	India Tamil Nadu
SAC1242	spontaneum	SES 113 A	WD1-SC-45-06	Brazil	Brazil
SAC1244	spontaneum	SES 135	WD1-SC-45-08	India	India Tamil Nadu
SAC1245	spontaneum	SES 178	WD1-SC-45-09	India	India
SAC1246	spontaneum	SES 197 B	WD1-SC-45-10	India	India
SAC1247	spontaneum	SES 220	WD1-SC-45-11	India	India
SAC1248	spontaneum	SES 234	WD1-SC-45-13	Malaysia	Malaysia
SAC1249	spontaneum	SES 251	WD1-SC-45-15	India	India
SAC125	officinarum	Tip, Red	WD1-SC-07-15	Cuba	Cuba La Habana
SAC1250	spontaneum	SES 260	WD1-SC-45-16	India	India
SAC1251	spontaneum	SES 264	WD1-SC-45-17	India	India
SAC1252	spontaneum	SES 270	WD1-SC-45-18	India	India
SAC1255	spontaneum	SES 289C	WD1-SC-45-21	India	India
SAC1256	spontaneum	SES 294	WD1-SC-45-22	India	India
SAC1257	spontaneum	SES 297A	WD1-SC-45-23	India	India
SAC1258	spontaneum	SES 297B	WD1-SC-45-24	India	India
SAC1259	spontaneum	SES 323	WD1-SC-45-25	India	India
SAC126	robustum	Ng 77-136	WD1-SC-07-20	Guadeloupe	Guadeloupe
SAC1260	spontaneum	SES 365	WD1-SC-45-27	India	India
SAC1261	spontaneum	SES 366	WD1-SC-45-28	India	India
SAC1262	spontaneum	SES 367	WD1-SC-45-29	India	India
SAC1263	spontaneum	SES 275	WD1-SC-45-30	India	India
SAC1266	spontaneum	SES 501	WD1-SC-45-33	India	India
SAC1267	spontaneum	SES 517	WD1-SC-45-34	India	India
SAC1268	spontaneum	SES 521	WD1-SC-45-35	India	India
SAC127	hybrid	Cg04-15398	WD1-SC-07-25	Guatemala	Guatemala
SAC1271	spontaneum	SH 301	WD1-SC-45-41	India	India
SAC1273	spontaneum	S. spont # 22	WD1-SC-45-45	Malaysia	Malaysia
SAC1275	spontaneum	Taiwan spont 002	WD1-SC-45-48	Taiwan	Taiwan
SAC1277	spontaneum	Taiwan spont 071	WD1-SC-45-56	Taiwan	Taiwan
SAC1278	spontaneum	Taiwan spont 072	WD1-SC-45-58	Taiwan	Taiwan
SAC128	robustum	Ng 77-238	WD1-SC-08-07	Papua New Guinea	Papua New Guinea
SAC1282	spontaneum	UM 69-015	WD1-SC-45-67	Malaysia	Malaysia
SAC1285	spontaneum	US 4616	WD1-SC-45-70	Uganda	Uganda
SAC1286	spontaneum	US 4625	WD1-SC-45-75	Kenya	Kenya
SAC1287	spontaneum	US 4633	WD1-SC-45-76	Kenya	Kenya
SAC1288	spontaneum	US 56-009-04	WD1-SC-45-80	Thailand	Thailand
SAC129	robustum	Ij 76-547	WD1-SC-08-23	Barbados	Mia Q # = Barbados
SAC1298	spontaneum	US 78-502	WD1-SC-45-98	Pakistan	Pakistan
SAC1299	spontaneum	US 78-504	WD1-SC-45-99	Pakistan	Pakistan
SAC1302	spontaneum	US 78-510	WD1-SC-45-103	Pakistan	Pakistan
SAC1303	spontaneum	US 78-513	WD1-SC-45-105	Pakistan	Pakistan
SAC1304	spontaneum	US 78-518	WD1-SC-45-110	Pakistan	Pakistan
SAC1306	spontaneum	US 78-519	WD1-SC-45-112	Pakistan	Pakistan
SAC1307	spontaneum	US 78-522	WD1-SC-45-113	Pakistan	Pakistan
SAC1308	spontaneum	US 78-523	WD1-SC-45-114	Pakistan	Pakistan
SAC1309	spontaneum	US 78-526	WD1-SC-45-115	Pakistan	Pakistan
SAC132	unknown	Ia 3107	WD1-SC-08-26	Unknown	Unknown
SAC133	unknown	Unk R39 P49	WD1-SC-08-30	Unknown	Unknown
SAC134	unknown	96 Ng-16	WD1-SC-08-35	Panama	Panama
SAC135	unknown	Cg 96-01	WD1-SC-09-08	Guatemala	Guatemala
SAC136	hybrid	Cr00026	WD1-SC-09-13	Dominican Republic	Dominican Republic
SAC137	hybrid	F 154	WD1-SC-09-14	Taiwan	Taiwan
SAC138	sinense	Kerah	WD1-SC-09-22	Indonesia	Indonesia Java
SAC139	robustum	Ng 77-094	WD1-SC-09-29	Guadeloupe	Guadeloupe
SAC140	barberi	Matna Shahj	WD1-SC-10-15	India	India Tamil Nadu
SAC141	unknown	T 4594443	WD1-SC-10-21	Unknown	Unknown
SAC142	barberi	Rounda	WD1-SC-10-26	India	India Tamil Nadu
SAC143	unknown	Im 76-236	WD1-SC-10-27	Unknown	Unknown
SAC144	unknown	Ng 84-045	WD1-SC-10-29	Unknown	Unknown
SAC145	barberi	Sunnabile	WD1-SC-10-30	India	India Tamil Nadu
SAC146	sinense	Agoule	WD1-SC-11-05	India	India Tamil Nadu
SAC147	unknown	Bs-3058	WD1-SC-11-20	Unknown	Unknown
SAC1470	officinarum	P-Mag-84-2-North_infected_offshoot	WD1-SC-06-12_North-A	Philippines	Philippines
SAC1471	officinarum	P-Mag-84-2-North_clean_terminal	WD1-SC-06-12_North-B	Philippines	Philippines
SAC1472	officinarum	P-Mag-84-2-North_infected_offshoot	WD1-SC-06-12_North-C	Philippines	Philippines
SAC1473	officinarum	P-Mag-84-2-North_clean_offshoot	WD1-SC-06-12_North-D	Philippines	Philippines
SAC1474	officinarum	P-Mag-84-2-North_infected_offshoot	WD1-SC-06-12_North-E	Philippines	Philippines
SAC1475	officinarum	P-Mag-84-2-North_clean_offshoot	WD1-SC-06-12_North-F	Philippines	Philippines
SAC1476	officinarum	P-Mag-84-2-North_clean_offshoot	WD1-SC-06-12_North-G	Philippines	Philippines
SAC1477	officinarum	P-Mag-84-2-North_clean_terminal	WD1-SC-06-12_North-H	Philippines	Philippines
SAC1478	officinarum	P-Mag-84-2-South_clean_terminal	WD1-SC-06-12_South-I	Philippines	Philippines
SAC1479	officinarum	P-Mag-84-2-South_clean_terminal	WD1-SC-06-12_South-J	Philippines	Philippines
SAC148	unknown	Ng 76-558	WD1-SC-11-21	Unknown	Unknown
SAC1480	officinarum	P-Mag-84-2-South_clean_offshoot	WD1-SC-06-12_South-K	Philippines	Philippines
SAC1481	officinarum	P-Mag-84-2-South_clean_offshoot	WD1-SC-06-12_South-L	Philippines	Philippines
SAC1482	hybrid	US 67-22-2	WD1-SC-09-10A	US	United States
SAC1483	hybrid	US 67-22-2	WD1-SC-09-10B	US	United States
SAC1484	hybrid	US 67-22-2	WD1-SC-09-10C	US	United States
SAC1485	hybrid	US 67-22-2	WD1-SC-09-10D	US	United States
SAC1486	hybrid	US 67-22-2	WD1-SC-09-10E	US	United States
SAC149	sinense	Lu Cane	WD1-SC-11-22	China	China
SAC150	hybrid	Co 419	WD1-SC-11-24	India	India
SAC151	hybrid	Co 313	WD1-SC-11-25	South Africa	South Africa
SAC152	hybrid	Co 312	WD1-SC-11-26	South Africa	South Africa
SAC153	unknown	Isd 2-54	WD1-SC-11-28	Bangladesh	Bangladesh
SAC154	unknown	Isd 29	WD1-SC-11-31	Bangladesh	Bangladesh
SAC155	hybrid	F 148	WD1-SC-12-02	Taiwan	Taiwan
SAC156	hybrid	F 160	WD1-SC-12-03	Taiwan	Taiwan
SAC157	hybrid	H 53-4596	WD1-SC-12-05	US	United States Hawaii
SAC158	unknown	Hm 661	WD1-SC-12-06	Unknown	Unknown
SAC159	hybrid	Nco 339	WD1-SC-12-15	South Africa	South Africa Kwazulu-natal
SAC160	unknown	43-100	WD1-SC-12-18	Unknown	Unknown
SAC161	unknown	43-188	WD1-SC-12-19	Unknown	Unknown
SAC162	unknown	45-64	WD1-SC-12-20	Unknown	Unknown
SAC163	robustum	In 84-045	WD1-SC-12-27	Barbados	Barbados
SAC164	robustum	Ng 77-055	WD1-SC-13-15	Papua New Guinea	Papua New Guinea
SAC165	unknown	R 45 Pt 107	WD1-SC-13-22	Unknown	Unknown
SAC166	robustum	Ij 76-482	WD1-SC-13-29	Indonesia	Indonesia
SAC167	robustum	Ij 76-547	WD1-SC-13-33	Barbados	Barbados
SAC168	unknown	Unknown (1995- R65-P50)	WD1-SC-14-10	Unknown	Unknown
SAC169	officinarum	620 S. Off.	WD1-SC-14-12	Unknown	Unknown
SAC170	unknown	Unknown (1995- R65-P58)	WD1-SC-14-14	Unknown	Unknown
SAC171	sinense	Tekcha, Okinawa	WD1-SC-15-01	China	China
SAC172	barberi	Khagzi	WD1-SC-15-09	India	India Tamil Nadu
SAC173	robustum	Ng 57-012	WD1-SC-15-10	US	United States
SAC174	sinense	Khakai	WD1-SC-15-13	India	India Tamil Nadu
SAC175	robustum	Ng 77-94	WD1-SC-15-19	Barbados	Barbados
SAC176	unknown	N 26-14	WD1-SC-15-24	Unknown	Unknown
SAC177	unknown	F 159	WD1-SC-15-31	Unknown	Unknown
SAC178	sinense	Tukuyu Dist. No. 1	WD1-SC-16-02	Tanzania	Tanzania
SAC179	sinense	Uba India	WD1-SC-16-03	India	India
SAC180	unknown	Unknown	WD1-SC-16-12	Unknown	Unknown
SAC181	hybrid	M 99/34	WD1-SC-16-22	Mauritius	Mauritius
SAC182	hybrid	Fiji 59	WD1-SC-17-03	Fiji	Fiji
SAC183	unknown	Cp 88-1762	WD1-SC-17-21	US	United States
SAC184	sinense	Pansahi 204	WD1-SC-18-15	India	India
SAC185	unknown	Cpsg-437	WD1-SC-18-20	Pakistan	Pakistan
SAC186	barberi	Khagzi	WD1-SC-18-27	India	India Tamil Nadu
SAC187	barberi	Ganapathy	WD1-SC-18-28	India	India Tamil Nadu
SAC188	sinense	Japonesa	WD1-SC-20-18	Costa Rica	Costa Rica Cartago
SAC189	hybrid	Cos 245	WD1-SC-21-22	India	India
SAC190	sinense	Tekcha, Chiki Island	WD1-SC-22-02	China	China
SAC192	sinense	Kerah	WD1-SC-20-20	Indonesia	Indonesia Java
SAC198	unknown	Unknown (1995- R65-P35)	WD1-SC-22-25	Unknown	Unknown
SAC199	robustum	Ng 57-054	WD1-SC-22-30	Papua New Guinea	Papua New Guinea
SAC200	robustum	Ij 76-496	WD1-SC-22-31	Indonesia	Indonesia
SAC201	spontaneum	Unknown (2009: R37-P052)	WD1-SC-37-52	Unknown	Unknown
SAC202	unknown	Unknown (2009- R37-P056)	WD1-SC-37-56	Unknown	Unknown
SAC204	unknown		WD1-SC-37-67	Unknown	Unknown
SAC205	spontaneum	IN 84-22	WD1-SC-39-14	Unknown	Unknown
SAC206	spontaneum	IN 84-089	WD1-SC-39-19	Indonesia	Indonesia
SAC207	spontaneum	Ind 81-082	WD1-SC-39-31	India	India Tamil Nadu
SAC208	spontaneum	Ind 81-157	WD1-SC-39-43	India	India Tamil Nadu
SAC209	spontaneum	Ind 82-241	WD1-SC-39-51	India	India
SAC210	spontaneum	Ledong No.1	WD1-SC-39-62	China	China
SAC211	spontaneum	Ng 77-176	WD1-SC-39-70	Papua New Guinea	Papua New Guinea
SAC212	spontaneum	S. spont # 22	WD1-SC-39-106	Unknown	Unknown
SAC213	spontaneum	S. spont # 89	WD1-SC-39-112	Unknown	Unknown
SAC214	spontaneum	Ses 072	WD1-SC-39-115	India	India
SAC215	spontaneum	Ses 184 A	WD1-SC-39-118	Unknown	Unknown
SAC216	spontaneum	Ses 297A	WD1-SC-39-127	India	India
SAC217	spontaneum	Ses 390	WD1-SC-39-130	India	India
SAC218	spontaneum	SES 519	WD1-SC-39-133	India	India
SAC219	spontaneum	US 78-508	WD1-SC-39-162	Pakistan	Pakistan North-west Frontier
SAC220	unknown	Taiwan 120	WD1-SC-39-175	Brazil	Brazil
SAC221	spontaneum	Djantoer Ii (2)	WD1-SC-41-06	Indonesia	Indonesia
SAC222	spontaneum	Glagah	WD1-SC-41-09	Argentina	Argentina
SAC224	unknown		WD1-SC-41-34	Unknown	Unknown
SAC225	spontaneum	IN 84-088	WD1-SC-41-44	Indonesia	Indonesia
SAC226	spontaneum	IS 76-192 (CANE 6148)	WD1-SC-41-68	Indonesia	Indonesia
SAC228	spontaneum	PCAV 84-18	WD1-SC-41-95	Philippines	Philippines
SAC229	spontaneum	PCA NOR 84-7	WD1-SC-41-101	Philippines	Philippines
SAC230	spontaneum	S 66-088	WD1-SC-41-116	Taiwan	Taiwan
SAC231	spontaneum	S 66-097	WD1-SC-41-117	Taiwan	Taiwan
SAC232	spontaneum	S 66-121	WD1-SC-41-119	Taiwan	Taiwan
SAC233	spontaneum	SES 066	WD1-SC-41-130	India	India
SAC234	spontaneum	SES 073	WD1-SC-41-132	India	India Tamil Nadu
SAC235	spontaneum	SES 011	WD1-SC-41-171	India	India
SAC240	officinarum	IJ 76-478	WD1-SC-43-50	Indonesia	Indonesia
SAC243	spontaneum	Ses 208	WD1-SC-43-128	India	India
SAC249	officinarum	Barbados White Sport	WD1-SC-01-10	India	India
SAC250	officinarum	IJ 76-319	lath house	Indonesia	Indonesia
SAC251	hybrid	Q 034	lath house	Australia	Queensland Australia
SAC252	officinarum	NG 28-285	WD1-SC-04-18	Papua New Guinea	Papua New Guinea
SAC253	officinarum	NG 28-213	WD1-SC-04-27	Papua New Guinea	Papua New Guinea
SAC254	unknown	Cp-91-055	WD1-SC-22-34	Unknown	Unknown
SAC255	officinarum	NG 77-065	lath house	Papua New Guinea	Papua New Guinea
SAC256	officinarum	Pundia	WD1-SC-06-05	Cuba	Cuba La Habana
SAC257	officinarum	Oi Kung	lath house	Myanmar	Myanmar
SAC258	officinarum	Red Tip	lath house	Malaysia	Malaysia
SAC259	officinarum	SS 57-01 (Awela Green)	WD1-SC-07-06	US	U.s. Hawaii
SAC260	robustum	NG 77-094	lath house	Papua New Guinea	Papua New Guinea
SAC262	sinense	Tanzhou	WD1-SC-09-33	China	China Guangxi
SAC263	hybrid	M 657/66	greenhouse	Mauritius	Mauritius
SAC264	officinarum	Hinahina	lath house	US	United States
SAC265	officinarum	NG 57-127	lath house	Barbados	Barbados
SAC266	sinense	Tekcha Chung Tseng or WD1-SC-22-04	WD1-SC-15-02	China	China
SAC267	hybrid	B 04362	greenhouse	Barbados	Barbados
SAC268	unknown	NG 57-053	lath house	Papua New Guinea	Papua New Guinea
SAC269	officinarum	Don Cico	WD1-SC-20-35	Unknown	Unknown
SAC270	sinense	Lu cane	WD1-SC-20-21	China	China
SAC271	sinense	Oshima	greenhouse	Japan	Japan
SAC272	barberi	Ganapathy	WD1-SC-21-02	India	India Tamil Nadu
SAC273	barberi	Mangwa	lath house	India	India Tamil Nadu
SAC274	hybrid	CO 1148	WD1-SC-21-21	India	India
SAC275	spontaneum	SES-006	WD1-SC-41-123	India	India
SAC276	officinarum	IJ 76-478	WD1-SC-43-50	Indonesia	Indonesia
SAC277	barberi	Chin	lath house	Unknown	Unknown
SAC278	hybrid	Cg03-292	WD1-SC-19-29	Guatemala	Guatemala
SAC279	officinarum	NG 28-279	full sun nursery	Unknown	Unknown
SAC280	officinarum	NG 57-076	lath house	Unknown	Unknown
SAC281	officinarum	NG 57-242	greenhouse	Unknown	Unknown
SAC282	spontaneum	Unk (2009)	WD1-SC-45-46	Unknown	Unknown
SAC283	hybrid	Q 196	greenhouse	Unknown	Unknown
SAC284	spontaneum	US 4515	WD1-SC-45-69	Turkistan	Turkistan
SAC286	unknown	Cp 94-0150	WD1-SC-19-11	Unknown	Unknown

## Sheet: Table S2
Table S2. The summary statistics of genetic parameters for SNP markers
MAF, minor allele frequency; Hexp, expected heterozygosity; Hobs, observed heterozygosity.
SNP	MAF	Hexp	Hobs	Missing.rate
AX-117226049-3153::Chr4C:26667761-26668062	0.17	0.28	0.34	0
AX-117226049-3355::Chr4D:27679740-27680041	0.17	0.28	0.34	0
AX-117296680-2443::Chr3C:76789817-76790118	0.12	0.22	0.25	0
AX-117872199-5688::Chr8C:10407925-10408226	0.32	0.43	0.63	0
AX-117872199-5948::Chr8D:9703645-9703946	0.32	0.43	0.63	0
AX-117911226-1754::Chr2D:7072106-7072407	0.11	0.19	0.22	0
AX-117952257-1434::Chr2C:17557422-17557723	0.21	0.33	0.41	0
AX-117952257-1797::Chr2D:9770585-9770886	0.21	0.33	0.41	0
AX-118001417-2405::Chr3C:57501449-57501750	0.23	0.36	0.47	0
AX-118036023-2110::Chr3B:42052271-42052572	0.07	0.12	0.13	0
AX-118036023-2542::Chr3D:21013336-21013637	0.07	0.12	0.13	0
AX-118039895-4946::Chr7B:24331336-24331637	0.31	0.43	0.61	0.00110988
AX-118039895-5254::Chr7D:22844860-22845161	0.3	0.42	0.61	0.00110988
AX-118044918-4526::Chr6C:53834298-53834599	0.08	0.15	0.16	0
AX-118044918-4669::Chr6D:48985755-48986056	0.08	0.15	0.16	0
AX-118058129-1799::Chr2D:97911248-97911549	0.07	0.13	0.14	0.00110988
AX-118104121-5712::Chr8C:15189005-15189306	0.18	0.29	0.36	0
AX-118104121-5818::Chr8D:12169746-12170047	0.18	0.29	0.36	0
AX-171236797-1502::Chr2C:40486126-40486427	0.33	0.44	0.65	0
AX-171236797-1686::Chr2D:31400001-31400302	0.33	0.44	0.65	0
AX-171237156-1239::Chr2B:24543781-24544082	0.17	0.28	0.33	0.00110988
AX-171237156-1655::Chr2D:20723435-20723736	0.17	0.28	0.33	0.00110988
AX-171237461-5939::Chr8D:66799906-66800207	0.07	0.13	0.13	0
AX-171238362-4693::Chr6D:60837756-60838057	0.32	0.43	0.64	0
AX-171238668-3657::Chr5B:12829702-12830003	0.06	0.12	0.12	0
AX-171238668-3961::Chr5D:20327664-20327965	0.06	0.12	0.12	0
AX-171239882-4089::Chr5D:79633194-79633495	0.1	0.18	0.2	0
AX-171240294-3423::Chr4D:62540314-62540615	0.26	0.39	0.52	0.00221976
AX-171240309-2612::Chr3D:43628248-43628549	0.22	0.35	0.45	0
AX-171240339-3328::Chr4D:2052203-2052504	0.19	0.31	0.38	0
AX-171240445-5144::Chr7C:5030963-5031264	0.06	0.11	0.12	0
AX-171240714-5162::Chr7C:61754934-61755235	0.12	0.21	0.24	0
AX-171240714-5324::Chr7D:54038989-54039290	0.12	0.22	0.25	0
AX-171241733-590::Chr1C:73348688-73348989	0.19	0.31	0.39	0
AX-171241733-858::Chr1D:69591045-69591346	0.19	0.31	0.39	0
AX-171243115-459::Chr1B:88400095-88400396	0.27	0.39	0.53	0
AX-171243115-892::Chr1D:85629654-85629955	0.27	0.39	0.53	0
AX-171243525-787::Chr1D:29355798-29356099	0.11	0.2	0.22	0.00110988
AX-171243646-792::Chr1D:31056208-31056509	0.06	0.11	0.12	0
AX-171243917-4651::Chr6D:4287042-4287343	0.09	0.16	0.18	0
AX-171244488-3676::Chr5B:16415756-16416057	0.08	0.14	0.16	0
AX-171244488-3987::Chr5D:23890075-23890376	0.08	0.14	0.16	0
AX-171246287-4066::Chr5D:61042423-61042724	0.09	0.16	0.17	0.00110988
AX-171247323-2523::Chr3D:15378342-15378643	0.06	0.11	0.12	0
AX-171247817-4714::Chr6D:7384069-7384370	0.16	0.27	0.32	0
AX-171247985-5866::Chr8D:33986728-33987029	0.16	0.27	0.32	0
AX-171248259-5871::Chr8D:37289471-37289772	0.4	0.48	0.77	0.00221976
AX-171250203-1625::Chr2D:12702568-12702869	0.2	0.32	0.39	0
AX-171250441-808::Chr1D:40925321-40925622	0.32	0.44	0.62	0.0588235
AX-171250699-1400::Chr2C:117196864-117197165	0.15	0.26	0.3	0
AX-171250699-1596::Chr2D:101921723-101922024	0.15	0.26	0.31	0
AX-171250713-2034::Chr3B:12066006-12066307	0.07	0.14	0.15	0
AX-171250713-2272::Chr3C:14944559-14944860	0.07	0.14	0.15	0.00110988
AX-171252809-4443::Chr6C:14689336-14689637	0.3	0.42	0.59	0.00332963
AX-171252809-4590::Chr6D:13505969-13506270	0.3	0.42	0.6	0
AX-171252876-2661::Chr3D:60607746-60608047	0.15	0.26	0.3	0.0266371
AX-171253774-3245::Chr4C:70505995-70506296	0.11	0.19	0.22	0
AX-171253774-3455::Chr4D:73602924-73603225	0.11	0.19	0.22	0
AX-171253968-5925::Chr8D:59369514-59369815	0.09	0.16	0.17	0
AX-171254606-2508::Chr3D:12884808-12885109	0.33	0.44	0.67	0
AX-171254834-2106::Chr3B:37753999-37754300	0.05	0.09	0.1	0
AX-171254834-2588::Chr3D:35130125-35130426	0.05	0.09	0.1	0
AX-171255371-629::Chr1C:91296107-91296408	0.09	0.16	0.18	0.00110988
AX-171255371-906::Chr1D:89141146-89141447	0.09	0.16	0.18	0.00110988
AX-171255470-5817::Chr8D:11587953-11588254	0.19	0.3	0.37	0.00110988
AX-171255521-4309::Chr6B:18776614-18776915	0.09	0.16	0.18	0
AX-171255521-4598::Chr6D:19197989-19198290	0.09	0.16	0.18	0
AX-171255825-5038::Chr7B:78022472-78022773	0.33	0.44	0.66	0
AX-171255825-5357::Chr7D:69122715-69123016	0.33	0.44	0.66	0
AX-171256355-5626::Chr8B:43336995-43337296	0.24	0.37	0.49	0.00110988
AX-171256355-5896::Chr8D:45356797-45357098	0.49	0.5	0.98	0
AX-171256409-4485::Chr6C:35008644-35008945	0.19	0.3	0.37	0
AX-171256409-4640::Chr6D:37666662-37666963	0.19	0.3	0.37	0
AX-171256533-3385::Chr4D:41188416-41188717	0.09	0.16	0.17	0
AX-171256984-732::Chr1D:115387319-115387620	0.23	0.35	0.46	0
AX-171256998-4067::Chr5D:63292031-63292332	0.05	0.09	0.09	0
AX-171257352-5321::Chr7D:51871064-51871365	0.13	0.22	0.25	0
AX-171257364-4591::Chr6D:17473506-17473807	0.05	0.09	0.1	0
AX-171257790-1515::Chr2C:43121496-43121797	0.07	0.13	0.13	0
AX-171257790-1703::Chr2D:36202212-36202513	0.07	0.13	0.13	0
AX-171258044-3258::Chr4C:74272942-74273243	0.14	0.25	0.29	0.00221976
AX-171258044-3465::Chr4D:77304241-77304542	0.15	0.25	0.29	0.00221976
AX-171258465-881::Chr1D:79942244-79942545	0.13	0.22	0.25	0
AX-171258829-5380::Chr7D:79615789-79616090	0.44	0.49	0.79	0.00665927
AX-171259328-1298::Chr2B:45165463-45165764	0.07	0.13	0.14	0.0199778
AX-171260253-4043::Chr5D:50389969-50390270	0.22	0.34	0.43	0
AX-171261078-827::Chr1D:51902569-51902870	0.25	0.37	0.49	0
AX-171261740-5443::Chr8A:1922631-1922932	0.06	0.11	0.11	0
AX-171261740-5586::Chr8B:205240-205541	0.06	0.11	0.11	0
AX-171261973-1708::Chr2D:39904764-39905065	0.24	0.37	0.47	0.00221976
AX-171262364-4100::Chr5D:81138681-81138982	0.2	0.32	0.4	0
AX-171262709-1942::Chr3A:48034747-48035048	0.14	0.24	0.28	0.0133185
AX-171263632-3433::Chr4D:68312547-68312848	0.08	0.14	0.16	0
AX-171263823-871::Chr1D:74020247-74020548	0.09	0.17	0.19	0
AX-171264516-3457::Chr4D:75628102-75628403	0.07	0.12	0.13	0
AX-171265298-2597::Chr3D:38301432-38301733	0.29	0.42	0.59	0
AX-171265386-3569::Chr5A:41038929-41039230	0.49	0.5	0.93	0.00776915
AX-171265386-3712::Chr5B:35179466-35179767	0.13	0.22	0.25	0.0310766
AX-171265862-5289::Chr7D:39564604-39564905	0.14	0.25	0.29	0
AX-171267405-1388::Chr2C:111276212-111276513	0.18	0.29	0.35	0
AX-171267405-1792::Chr2D:96395491-96395792	0.18	0.29	0.35	0
AX-171267430-2197::Chr3B:81849545-81849846	0.48	0.5	0.95	0
AX-171267430-2625::Chr3D:45169875-45170176	0.48	0.5	0.95	0
AX-171267692-3818::Chr5C:18875346-18875647	0.05	0.1	0.11	0.00110988
AX-171267996-5929::Chr8D:62369501-62369802	0.08	0.14	0.15	0
AX-171268105-1643::Chr2D:16823892-16824193	0.05	0.09	0.09	0
AX-171268232-794::Chr1D:31162814-31163115	0.24	0.37	0.48	0
AX-171268275-5386::Chr7D:81320477-81320778	0.12	0.21	0.24	0
AX-171268533-4584::Chr6D:10136055-10136356	0.05	0.09	0.09	0
AX-171269142-3324::Chr4D:18828765-18829066	0.08	0.15	0.17	0
AX-171269335-3422::Chr4D:62522353-62522654	0.05	0.1	0.11	0
AX-171269756-1611::Chr2D:105075479-105075780	0.06	0.12	0.12	0.00110988
AX-171270244-5280::Chr7D:35489550-35489851	0.07	0.13	0.13	0
AX-171270269-5464::Chr8A:24467435-24467736	0.46	0.5	0.91	0
AX-171270269-5742::Chr8C:24947433-24947734	0.46	0.5	0.91	0
AX-171270569-3055::Chr4B:75471756-75472057	0.08	0.15	0.17	0
AX-171270569-3274::Chr4C:79075825-79076126	0.08	0.15	0.17	0
AX-171271206-4025::Chr5D:4247870-4248171	0.32	0.44	0.64	0
AX-171271375-2531::Chr3D:18204031-18204332	0.11	0.19	0.22	0
AX-171271837-2602::Chr3D:40066217-40066518	0.1	0.18	0.2	0
AX-171273636-2670::Chr3D:7457331-7457632	0.05	0.09	0.1	0
AX-171275085-5030::Chr7B:75777285-75777586	0.09	0.17	0.19	0
AX-171275257-5292::Chr7D:39761911-39762212	0.1	0.19	0.21	0
AX-171275456-5689::Chr8C:10407984-10408285	0.11	0.19	0.22	0
AX-171275456-5947::Chr8D:9703586-9703887	0.11	0.19	0.22	0
AX-171276280-5446::Chr8A:19835592-19835893	0.27	0.39	0.54	0.00221976
AX-171276431-672::Chr1D:103665582-103665883	0.42	0.49	0.81	0
AX-171277506-2589::Chr3D:36849210-36849511	0.3	0.42	0.6	0
AX-171278478-5597::Chr8B:2895279-2895580	0.05	0.09	0.1	0
AX-171278478-5872::Chr8D:3764135-3764436	0.05	0.09	0.1	0
AX-171278504-1685::Chr2D:30731598-30731899	0.27	0.39	0.53	0
AX-171278520-2214::Chr3B:86361787-86362088	0.14	0.23	0.27	0.0122087
AX-171278520-2643::Chr3D:50576217-50576518	0.14	0.23	0.27	0.0122087
AX-171278530-2574::Chr3D:29645352-29645653	0.09	0.17	0.19	0
AX-171278760-4062::Chr5D:59386077-59386378	0.07	0.13	0.13	0
AX-171279059-3351::Chr4D:26721876-26722177	0.08	0.14	0.16	0.00110988
AX-171281648-5932::Chr8D:63827897-63828198	0.05	0.1	0.1	0
AX-171283391-4332::Chr6B:31570231-31570532	0.06	0.11	0.12	0.00221976
AX-171283391-4481::Chr6C:32960004-32960305	0.06	0.11	0.11	0
AX-171283638-1556::Chr2C:67150463-67150764	0.06	0.11	0.12	0
AX-171284042-2982::Chr4B:54252966-54253267	0.28	0.41	0.56	0
AX-171284042-3412::Chr4D:57905904-57906205	0.28	0.41	0.56	0
AX-171284173-925::Chr1D:92112998-92113299	0.06	0.1	0.11	0.00110988
AX-171284173-987::Chr2A:110536725-110537026	0.06	0.1	0.11	0.00110988
AX-171284841-5177::Chr7C:67982580-67982881	0.08	0.14	0.15	0.00110988
AX-171284841-5387::Chr7D:82839505-82839806	0.07	0.14	0.15	0.00110988
AX-171284869-4070::Chr5D:63953474-63953775	0.12	0.22	0.25	0
AX-171285322-660::Chr1D:100898762-100899063	0.07	0.13	0.14	0
AX-171285955-3782::Chr5B:9426404-9426705	0.27	0.39	0.53	0
AX-171285955-3957::Chr5D:17573394-17573695	0.27	0.39	0.53	0
AX-171287224-1157::Chr2A:95269425-95269726	0.49	0.5	0.94	0
AX-171287455-3359::Chr4D:28590393-28590694	0.29	0.41	0.55	0.00665927
AX-171287634-5805::Chr8D:10495293-10495594	0.18	0.29	0.35	0
AX-171287687-621::Chr1C:87620882-87621183	0.05	0.09	0.1	0
AX-171287687-893::Chr1D:86373932-86374233	0.05	0.09	0.1	0
AX-171287985-3761::Chr5B:768919-769220	0.35	0.45	0.69	0
AX-171288013-664::Chr1D:101972665-101972966	0.14	0.24	0.28	0
AX-171288077-2539::Chr3D:20618273-20618574	0.06	0.1	0.11	0
AX-171288341-2111::Chr3B:42062734-42063035	0.14	0.25	0.29	0
AX-171288341-2541::Chr3D:21002372-21002673	0.14	0.25	0.29	0
AX-171288570-1413::Chr2C:123467362-123467663	0.06	0.11	0.12	0
AX-171288658-2355::Chr3C:37371182-37371483	0.16	0.27	0.32	0
AX-171288658-2568::Chr3D:27707806-27708107	0.16	0.27	0.32	0
AX-171289129-3974::Chr5D:21904061-21904362	0.11	0.2	0.22	0
AX-171289322-4557::Chr6C:79101365-79101666	0.06	0.12	0.13	0
AX-171289322-4703::Chr6D:68178044-68178345	0.06	0.12	0.13	0
AX-171289490-5314::Chr7D:45960975-45961276	0.1	0.18	0.2	0.00221976
AX-171289573-4002::Chr5D:27530150-27530451	0.09	0.16	0.17	0
AX-171290326-5849::Chr8D:23186931-23187232	0.16	0.27	0.33	0
AX-171291015-1398::Chr2C:115631296-115631597	0.06	0.11	0.12	0
AX-171291063-4636::Chr6D:36401137-36401438	0.14	0.24	0.28	0
AX-171291587-2652::Chr3D:54402293-54402594	0.11	0.2	0.23	0
AX-171292005-5876::Chr8D:38284380-38284681	0.08	0.15	0.16	0
AX-171292017-2025::Chr3A:8682974-8683275	0.15	0.25	0.3	0.00110988
AX-171292017-2525::Chr3D:15641921-15642222	0.15	0.25	0.3	0.00110988
AX-171293176-4561::Chr6C:8011573-8011874	0.14	0.25	0.29	0
AX-171293176-4713::Chr6D:7383882-7384183	0.14	0.25	0.29	0
AX-171293210-3454::Chr4D:73052094-73052395	0.32	0.43	0.62	0
AX-171293409-3762::Chr5B:82213650-82213951	0.08	0.16	0.17	0
AX-171293888-5592::Chr8B:27376310-27376611	0.43	0.49	0.81	0
AX-171293990-795::Chr1D:31249303-31249604	0.3	0.42	0.61	0.00332963
AX-171294032-3800::Chr5C:12851128-12851429	0.15	0.25	0.3	0
AX-171294032-3980::Chr5D:22785088-22785389	0.15	0.25	0.3	0
AX-171294378-2537::Chr3D:19885101-19885402	0.07	0.13	0.14	0.00665927
AX-171294791-3401::Chr4D:53237692-53237993	0.09	0.16	0.17	0.00110988
AX-171294835-752::Chr1D:18434337-18434638	0.36	0.46	0.72	0
AX-171295519-898::Chr1D:87194211-87194512	0.17	0.29	0.35	0
AX-171295532-828::Chr1D:51926464-51926765	0.1	0.18	0.2	0
AX-171295582-2931::Chr4B:31480873-31481174	0.05	0.1	0.1	0
AX-171295582-3378::Chr4D:38238131-38238432	0.05	0.1	0.1	0
AX-171296673-4663::Chr6D:48358452-48358753	0.05	0.1	0.11	0
AX-171296946-1631::Chr2D:14488667-14488968	0.09	0.17	0.18	0
AX-171297356-1660::Chr2D:22964875-22965176	0.18	0.29	0.36	0
AX-171297409-2528::Chr3D:17262642-17262943	0.13	0.22	0.25	0
AX-171297588-4065::Chr5D:60968213-60968514	0.09	0.17	0.19	0
AX-171298012-3399::Chr4D:4847992-4848293	0.09	0.17	0.18	0
AX-171298554-2267::Chr3C:13293162-13293463	0.5	0.5	0.99	0
AX-171298554-2671::Chr3D:8112909-8113210	0.5	0.5	0.99	0
AX-171298781-390::Chr1B:5403803-5404104	0.31	0.43	0.62	0.00110988
AX-171298781-835::Chr1D:6192124-6192425	0.31	0.43	0.62	0
AX-171299524-765::Chr1D:21928217-21928518	0.11	0.19	0.21	0
AX-171300099-464::Chr1B:9084280-9084581	0.15	0.25	0.3	0
AX-171300099-465::Chr1B:9129390-9129691	0.15	0.25	0.3	0
AX-171300099-921::Chr1D:9116159-9116460	0.15	0.25	0.3	0
AX-171300113-4932::Chr7B:20400415-20400716	0.1	0.18	0.2	0
AX-171300113-4933::Chr7B:20420452-20420753	0.1	0.18	0.2	0
AX-171300113-5077::Chr7C:18494902-18495203	0.1	0.18	0.2	0
AX-171300125-2601::Chr3D:39470255-39470556	0.44	0.49	0.89	0
AX-171300705-940::Chr1D:95822523-95822824	0.31	0.42	0.61	0
AX-171301140-3106::Chr4C:15972957-15973258	0.29	0.41	0.58	0
AX-171301140-3320::Chr4D:17055050-17055351	0.29	0.41	0.58	0
AX-171301194-1789::Chr2D:94266577-94266878	0.09	0.17	0.19	0
AX-171301417-5926::Chr8D:6024957-6025258	0.07	0.14	0.15	0
AX-171301515-4352::Chr6B:43719019-43719320	0.08	0.14	0.15	0
AX-171301584-159::Chr1A:71450011-71450312	0.05	0.1	0.1	0
AX-171301625-3486::Chr4D:8468799-8469100	0.11	0.19	0.21	0
AX-171301730-1517::Chr2C:44614149-44614450	0.07	0.14	0.15	0
AX-171301730-1721::Chr2D:45309590-45309891	0.07	0.14	0.15	0
AX-171302445-3308::Chr4D:14815148-14815449	0.09	0.17	0.19	0
AX-171304423-3442::Chr4D:70199914-70200215	0.14	0.24	0.28	0
AX-171304494-1559::Chr2C:69653401-69653702	0.1	0.19	0.21	0
AX-171304494-1748::Chr2D:62325865-62326166	0.1	0.19	0.21	0
AX-171304499-683::Chr1D:106115272-106115573	0.07	0.13	0.14	0
AX-171305242-866::Chr1D:73093043-73093344	0.07	0.12	0.13	0
AX-171305288-5326::Chr7D:5671726-5672027	0.44	0.49	0.86	0
AX-171305424-5045::Chr7B:80181102-80181403	0.12	0.21	0.23	0
AX-171305424-5356::Chr7D:67813880-67814181	0.12	0.21	0.23	0
AX-171305983-930::Chr1D:93082462-93082763	0.19	0.31	0.38	0
AX-171305983-931::Chr1D:93314570-93314871	0.19	0.3	0.38	0
AX-171306715-1510::Chr2C:42570213-42570514	0.14	0.23	0.27	0
AX-171306715-1692::Chr2D:33691514-33691815	0.14	0.24	0.27	0
AX-171307304-1735::Chr2D:53739087-53739388	0.21	0.33	0.42	0
AX-171307322-2639::Chr3D:49628667-49628968	0.07	0.13	0.14	0.00110988
AX-171307405-2957::Chr4B:43477049-43477350	0.23	0.36	0.47	0.0299667
AX-171307405-3404::Chr4D:55753276-55753577	0.23	0.36	0.46	0.00221976
AX-171307616-5808::Chr8D:10865592-10865893	0.05	0.1	0.11	0
AX-171308297-5369::Chr7D:76597457-76597758	0.46	0.5	0.91	0.00110988
AX-171309075-185::Chr1A:84500548-84500849	0.38	0.47	0.6	0
AX-171309236-3861::Chr5C:4404619-4404920	0.06	0.12	0.13	0
AX-171309236-3952::Chr5D:15841362-15841663	0.06	0.12	0.13	0
AX-171309683-5784::Chr8C:52645787-52646088	0.07	0.14	0.15	0.00665927
AX-171309683-5911::Chr8D:53404179-53404480	0.08	0.14	0.16	0
AX-171312942-5236::Chr7D:13541844-13542145	0.15	0.25	0.3	0
AX-171313173-2644::Chr3D:5160795-5161096	0.26	0.39	0.53	0
AX-171313689-1549::Chr2C:62994891-62995192	0.07	0.13	0.14	0
AX-171313689-1550::Chr2C:63004354-63004655	0.07	0.13	0.14	0
AX-171313689-1741::Chr2D:55828587-55828888	0.07	0.13	0.14	0
AX-171314129-3114::Chr4C:1743814-1744115	0.14	0.23	0.27	0
AX-171314129-3375::Chr4D:3560737-3561038	0.14	0.23	0.27	0
AX-171314187-5903::Chr8D:50447559-50447860	0.09	0.17	0.19	0
AX-171314522-2526::Chr3D:16017680-16017981	0.33	0.44	0.66	0
AX-171315767-5830::Chr8D:16293290-16293591	0.09	0.16	0.18	0
AX-171315983-891::Chr1D:85318773-85319074	0.13	0.22	0.26	0.00110988
AX-171316076-5166::Chr7C:63311828-63312129	0.08	0.15	0.16	0
AX-171316076-5325::Chr7D:54578793-54579094	0.09	0.17	0.18	0
AX-171316271-2268::Chr3C:13617607-13617908	0.08	0.14	0.15	0.00110988
AX-171316271-2673::Chr3D:8148177-8148478	0.08	0.14	0.15	0.00110988
AX-171316695-2582::Chr3D:34317511-34317812	0.5	0.5	0.79	0.00665927
AX-171316783-5176::Chr7C:67025244-67025545	0.13	0.22	0.26	0
AX-171316995-3236::Chr4C:67226400-67226701	0.4	0.48	0.8	0
AX-171316995-3440::Chr4D:70059036-70059337	0.4	0.48	0.8	0
AX-171317899-2433::Chr3C:72782688-72782989	0.1	0.18	0.21	0
AX-171317899-2600::Chr3D:39316739-39317040	0.11	0.19	0.22	0
AX-171318152-5115::Chr7C:39714758-39715059	0.13	0.23	0.27	0
AX-171318152-5275::Chr7D:32956667-32956968	0.13	0.23	0.27	0
AX-171318266-2980::Chr4B:50622705-50623006	0.06	0.11	0.11	0.00110988
AX-171318377-2605::Chr3D:40204233-40204534	0.1	0.18	0.2	0
AX-171319106-4642::Chr6D:38652320-38652621	0.18	0.29	0.36	0
AX-171319132-2667::Chr3D:7018704-7019005	0.07	0.13	0.14	0
AX-171320282-4045::Chr5D:50932761-50933062	0.12	0.22	0.25	0
AX-171321109-2441::Chr3C:75484717-75485018	0.11	0.19	0.22	0.00221976
AX-171321109-2607::Chr3D:41372033-41372334	0.11	0.19	0.22	0
AX-171321858-5936::Chr8D:66417057-66417358	0.26	0.38	0.51	0.0266371
AX-171321874-3329::Chr4D:2054357-2054658	0.05	0.1	0.1	0.00110988
AX-171322048-3227::Chr4C:6397742-6398043	0.09	0.17	0.19	0
AX-171322048-3426::Chr4D:6544009-6544310	0.09	0.17	0.19	0
AX-171322269-1780::Chr2D:89051963-89052264	0.14	0.23	0.27	0
AX-171322422-2725::Chr4A:24402080-24402381	0.05	0.1	0.11	0
AX-171322422-3346::Chr4D:25146938-25147239	0.05	0.1	0.11	0
AX-171322439-1490::Chr2C:37643350-37643651	0.07	0.13	0.14	0
AX-171322439-1678::Chr2D:28624550-28624851	0.07	0.13	0.14	0
AX-171323918-3302::Chr4D:1406513-1406814	0.16	0.27	0.33	0
AX-171324753-3445::Chr4D:70756361-70756662	0.05	0.1	0.1	0.00110988
AX-171325316-5420::Chr8A:14140696-14140997	0.16	0.27	0.33	0
AX-171325620-178::Chr1A:80705703-80706004	0.22	0.34	0.44	0
AX-171327044-816::Chr1D:42587302-42587603	0.08	0.14	0.15	0.00554939
AX-171328189-5840::Chr8D:18180258-18180559	0.08	0.14	0.15	0
AX-171330705-4909::Chr7B:13237446-13237747	0.06	0.12	0.13	0
AX-171330705-5225::Chr7C:9359025-9359326	0.06	0.12	0.13	0
AX-171331841-5897::Chr8D:45820730-45821031	0.07	0.13	0.14	0
AX-171332712-826::Chr1D:51568645-51568946	0.07	0.14	0.15	0
AX-171333433-909::Chr1D:89430929-89431230	0.11	0.2	0.23	0
AX-171333747-3105::Chr4C:15157695-15157996	0.06	0.11	0.11	0.0754717
AX-171333747-3315::Chr4D:16078776-16079077	0.06	0.11	0.11	0.0754717
AX-171334090-2377::Chr3C:44124105-44124406	0.09	0.16	0.18	0
AX-171334090-2581::Chr3D:33726605-33726906	0.09	0.16	0.18	0
AX-171334272-2535::Chr3D:19230384-19230685	0.08	0.15	0.16	0
AX-171334287-799::Chr1D:32627289-32627590	0.41	0.48	0.81	0
AX-171334467-1693::Chr2D:33696883-33697184	0.06	0.12	0.12	0.00110988
AX-171350439-1295::Chr2B:42377777-42378078	0.08	0.15	0.16	0
AX-171350439-1706::Chr2D:37789479-37789780	0.08	0.15	0.16	0
AX-171350571-1704::Chr2D:36532705-36533006	0.05	0.09	0.09	0
AX-171351484-542::Chr1C:39864213-39864514	0.08	0.14	0.15	0.00110988
AX-171351484-815::Chr1D:41723075-41723376	0.08	0.14	0.15	0.00110988
AX-171351528-1600::Chr2D:102707968-102708269	0.16	0.27	0.32	0.00665927
AX-171351544-4573::Chr6C:885653-885954	0.07	0.14	0.15	0
AX-171351544-4658::Chr6D:452677-452978	0.07	0.14	0.15	0
AX-171352627-3872::Chr5C:49112409-49112710	0.06	0.12	0.13	0
AX-171352627-4051::Chr5D:53878858-53879159	0.06	0.12	0.13	0
AX-171353578-1507::Chr2C:41754304-41754605	0.09	0.17	0.18	0
AX-171354325-2983::Chr4B:54254337-54254638	0.26	0.38	0.51	0
AX-171354325-3411::Chr4D:57904520-57904821	0.26	0.38	0.51	0
AX-171354572-3990::Chr5D:24339567-24339868	0.05	0.09	0.1	0
AX-171354812-3398::Chr4D:4801764-4802065	0.05	0.09	0.09	0
AX-171354898-2519::Chr3D:14882127-14882428	0.11	0.2	0.22	0
AX-171355015-3309::Chr4D:14843810-14844111	0.12	0.21	0.23	0
AX-171355245-4724::Chr6D:91055729-91056030	0.1	0.18	0.2	0.00776915
AX-171355344-4633::Chr6D:32073931-32074232	0.06	0.1	0.11	0
AX-171355373-4646::Chr6D:39616222-39616523	0.16	0.27	0.32	0.00110988
AX-171356152-1599::Chr2D:102707933-102708234	0.05	0.09	0.1	0
AX-171356527-5267::Chr7D:26806958-26807259	0.1	0.18	0.2	0
AX-171357625-1802::Chr2D:98905238-98905539	0.1	0.18	0.21	0
AX-171358091-301::Chr1B:12885462-12885763	0.12	0.2	0.23	0
AX-171358091-53::Chr1A:14600215-14600516	0.12	0.21	0.23	0.00110988
AX-171358091-736::Chr1D:12741285-12741586	0.12	0.2	0.23	0
AX-171358856-4609::Chr6D:22691815-22692116	0.46	0.5	0.93	0.00221976
AX-171359099-5912::Chr8D:53622171-53622472	0.12	0.21	0.24	0
AX-171359105-5794::Chr8C:7257688-7257989	0.07	0.13	0.14	0
AX-171359105-5941::Chr8D:7189713-7190014	0.07	0.13	0.14	0
AX-171359344-916::Chr1D:90226922-90227223	0.05	0.1	0.1	0
AX-171359396-2506::Chr3D:12436069-12436370	0.21	0.33	0.41	0
AX-171359764-2194::Chr3B:81034039-81034340	0.15	0.26	0.3	0.00110988
AX-171359764-2619::Chr3D:44193916-44194217	0.15	0.26	0.3	0.00110988
AX-171360232-359::Chr1B:37441596-37441897	0.09	0.16	0.18	0
AX-171360232-800::Chr1D:32749581-32749882	0.09	0.16	0.18	0
AX-171361047-4378::Chr6B:55076966-55077267	0.07	0.13	0.14	0
AX-171361819-5907::Chr8D:51468476-51468777	0.4	0.48	0.74	0.00221976
AX-171362088-5202::Chr7C:76569748-76570049	0.13	0.22	0.26	0.00221976
AX-171363001-1457::Chr2C:24339826-24340127	0.07	0.12	0.13	0
AX-171363333-3350::Chr4D:26713915-26714216	0.06	0.12	0.12	0
AX-171363600-3972::Chr5D:21408952-21409253	0.31	0.43	0.63	0
AX-171363616-2678::Chr3D:9669232-9669533	0.11	0.19	0.22	0
AX-171365338-4516::Chr6C:51178445-51178746	0.14	0.24	0.27	0
AX-171366026-4064::Chr5D:60957876-60958177	0.18	0.3	0.36	0
AX-171366486-670::Chr1D:10275802-10276103	0.12	0.22	0.25	0
AX-171367183-2290::Chr3C:22032680-22032981	0.06	0.12	0.13	0
AX-171367183-2518::Chr3D:14676788-14677089	0.07	0.12	0.13	0
AX-171367771-4217::Chr6A:63263145-63263446	0.47	0.5	0.91	0
AX-171367882-5620::Chr8B:40564636-40564937	0.48	0.5	0.89	0.00110988
AX-171367921-1480::Chr2C:31431888-31432189	0.09	0.16	0.18	0.00221976
AX-171368684-2561::Chr3D:25824163-25824464	0.11	0.19	0.22	0
AX-171368988-3338::Chr4D:23031620-23031921	0.06	0.1	0.11	0
AX-171369261-5389::Chr7D:8383009-8383310	0.1	0.19	0.21	0
AX-171369890-339::Chr1B:31541767-31542068	0.18	0.29	0.36	0
AX-171370052-5222::Chr7C:9026410-9026711	0.08	0.15	0.16	0
AX-171370052-5233::Chr7D:12131740-12132041	0.08	0.15	0.16	0
AX-171370296-824::Chr1D:46775346-46775647	0.05	0.1	0.1	0

## Sheet: Table S3
Table S3. List of duplicated Saccharum accessions
Group	Sample.name	Sccharum.species	Clone.Name	Source of introduction
Group1	SAC0357	officinarum	P-MAG-84-13	Philippines
	SAC1470	officinarum	P-Mag-84-2-North_infected_offshoot	Philippines
	SAC1471	officinarum	P-Mag-84-2-North_clean_terminal	Philippines
	SAC1472	officinarum	P-Mag-84-2-North_infected_offshoot	Philippines
	SAC1475	officinarum	P-Mag-84-2-North_clean_offshoot	Philippines
	SAC1477	officinarum	P-Mag-84-2-North_clean_terminal	Philippines
	SAC1479	officinarum	P-Mag-84-2-South_clean_terminal	Philippines
	SAC1480	officinarum	P-Mag-84-2-South_clean_offshoot	Philippines
	SAC1481	officinarum	P-Mag-84-2-South_clean_offshoot	Philippines
Group2	SAC0472	sinense	UBA NAQUIN	US
	SAC0513	sinense	NEPAL 3	Nepal
	SAC0518	sinense	CHINA	South Africa
	SAC0519	sinense	AGAUL	South Africa
	SAC0531	sinense	TANZHOU	china
	SAC0616	sinense	MCILKRUM	US
	SAC0670	barberi	Kinar	India
	SAC0711	sinense	Uba Striped	Unknown
	SAC0760	sinense	Cayana 10	Unknown
Group3	SAC0321	robustum	IN 84-045	Barbados
	SAC0425	barberi	MESANGEN	Guyana
	SAC0426	robustum	IN 84-045	Barbados
	SAC0458	officinarum	HORNE	Barbados
	SAC0461	robustum	NG 28-251	Guadeloupe
	SAC0476	unknown	UNKNOWN	Unknown
Group4	SAC0323	officinarum	NG 28-014 (SS 58-08)	Papua New Guinea
	SAC0436	robustum	NG 57-208	US
	SAC0447	robustum	NG 57-208	US
	SAC1234	robustum	NG 57-208	US
Group5	SAC0336	robustum	NG 57-208	Unknown
	SAC0427	robustum	NG 57-238	Barbados
	SAC0430	robustum	NG 28-289	Papua New Guinea
	SAC0446	robustum	NG 57-238	Barbados
Group6	SAC0539	hybrid	M 093/48	Mauritius
	SAC0654	unknown	UNKNOWN R 56 P 28	Unknown
	SAC0728	hybrid	M 63/39	Unknown
	SAC0766	hybrid	M 555/60	Unknown
Group7	SAC0615	sinense	MANEIRA	India
	SAC0617	unknown	UNKNOWN 71-20	Unknown
	SAC0619	sinense	MERTHI	India
	SAC0651	sinense	MANKIA	India
Group8	SAC0744	robustum	IN 84-052	Unknown
	SAC0797	spontaneum	IK 76-74	Barbados
	SAC0863	spontaneum	IK 76-71	Barbados
	SAC1046	spontaneum	IK 76-067	US
Group9	SAC0288	officinarum	AKOKI 22	US
	SAC0289	officinarum	ANOMAN	Papua New Guinea
	SAC0469	officinarum	AKOKI 22	US
Group10	SAC0310	officinarum	IJ76-418B	US
	SAC0489	robustum	IJ 76-435	Indonesia
	SAC0691	hybrid	COS 510	Unknown
Group11	SAC0330	robustum	NG 77-021	Papua New Guinea
	SAC0405	robustum	NG 77-021	Guadeloupe
	SAC0429	robustum	NG 77-021	Guadeloupe
Group12	SAC0337	hybrid	US 67-22-2	US
	SAC0408	hybrid	US 67-22-2	US
	SAC1482	hybrid	US 67-22-2	US
Group13	SAC0453	hybrid	FIJI 53	Fiji
	SAC0551	unknown	MOL 6427	US
	SAC0569	unknown	MOL 6427	US
Group14	SAC0473	unknown	UNKNOWN (1995: R65-P25)	Unknown
	SAC0562	unknown	UNKNOWN	Unknown
	SAC0642	unknown	UNKNOWN 1995: R65 P25	Unknown
Group15	SAC0614	sinense	KAVANGIRE	Argentina
	SAC0618	unknown	MORTHI	Unknown
	SAC0629	barberi	MANGWA	India
Group16	SAC0855	spontaneum	NG US 56-19-3	Barbados
	SAC0870	unknown	US 56-15-1	Pakistan
	SAC1023	spontaneum	US 56-15-08	Thailand
Group17	SAC1107	spontaneum	SES 004A	India
	SAC1307	spontaneum	US 78-522	Pakistan
	SAC1308	spontaneum	US 78-523	Pakistan
Group18	SAC133	unknown	Unk R39 P49	Unknown
	SAC173	robustum	Ng 57-012	US
	SAC260	robustum	NG 77-094	Papua New Guinea
Group19	SAC1474	officinarum	P-Mag-84-2-North_infected_offshoot	Philippines
	SAC1476	officinarum	P-Mag-84-2-North_clean_offshoot	Philippines
	SAC1478	officinarum	P-Mag-84-2-South_clean_terminal	Philippines
Group20	SAC0302	hybrid	BO 11	India
	SAC0694	hybrid	BO 14	Unknown
Group21	SAC0326	officinarum	NG 57-072	Papua New Guinea
	SAC0627	barberi	KHATUIA	India
Group22	SAC0332	unknown	IK 76-77	Unknown
	SAC0343	spontaneum	IK 76-72	Barbados
Group23	SAC0333	officinarum	NG 51 042	Papua New Guinea
	SAC0628	barberi	KUSWAR	India
Group24	SAC0334	officinarum	NG 51 038	Papua New Guinea
	SAC0417	barberi	GANAPATHY	India
Group25	SAC0350	unknown	UNKNOWN #1	Unknown
	SAC0653	unknown	CP 91-555	US
Group26	SAC0351	unknown	UNKNOWN	Unknown
	SAC0474	robustum	NG 77-39	Barbados
Group27	SAC0362	officinarum	NG 77-182	Papua New Guinea
	SAC0363	officinarum	NG 77-154	Papua New Guinea
Group28	SAC0373	officinarum	UM 68-010	Malaysia
	SAC0404	unknown	UNKNOWN (1995) R 59 P 33	Unknown
Group29	SAC0375	unknown	UNKNOWN (1995: R45-P078)	Unknown
	SAC0450	hybrid	H 32-8560	US
Group30	SAC0379	unknown	UNKNOWN (1995: R56-P24)	Unknown
	SAC0626	unknown	UNKNOWN 1995: R43 PO25	Unknown
Group31	SAC0380	unknown	UNKNOWN (1995: R56-P50)	Unknown
	SAC0657	hybrid	US 71-53-01	Taiwan
Group32	SAC0389	barberi	REORI	India
	SAC0718	barberi	Khari	Unknown
Group33	SAC0390	unknown	UNKNOWN	Unknown
	SAC0528	officinarum	UNKNOWN S. OFF.	Unknown
Group34	SAC0394	officinarum	NG 57-030	Guadeloupe
	SAC0423	officinarum	NG 57-030	Guadeloupe
Group35	SAC0406	hybrid	H 83-6147	US
	SAC0540	hybrid	H 83-6147	US
Group36	SAC0407	hybrid	US 67-22-2	US
	SAC1484	hybrid	US 67-22-2	US
Group37	SAC0411	unknown	UNKNOWN 45-60 TRELLIS	Unknown
	SAC0502	unknown	B 69691	Unknown
Group38	SAC0421	officinarum	MAURITIOUS GUINGHAM	Guadeloupe
	SAC0708	robustum	Molokai 5099	Unknown
Group39	SAC0431	hybrid	DI 52	Indonesia
	SAC0665	hybrid	Diamond 10	Barbados
Group40	SAC0440	hybrid	ZN 10	Zimbabwe
	SAC0492	officinarum	HC 71	US
Group41	SAC0465	robustum	NG 77-021	Guadeloupe
	SAC0624	unknown	POJ028	Unknown
Group42	SAC0475	unknown	UNKNOWN (1995: R37-PO46)	Unknown
	SAC0496	unknown	UNKNOWN (1995: R65-P41)	Unknown
Group43	SAC0478	officinarum	BISCUIT	Guadeloupe
	SAC0479	officinarum	BISCUIT	Guadeloupe
Group44	SAC0487	unknown	CPCL 99-1401	Unknown
	SAC0770	hybrid	CO 0331	Unknown
Group45	SAC0493	unknown	KT 730	US
	SAC0497	unknown	MOL 6446	US
Group46	SAC0494	officinarum	UB 14	US
	SAC0655	hybrid	US 71-53-01	Taiwan
Group47	SAC0511	officinarum	HC 71	US
	SAC0721	officinarum	Halalii	Unknown
Group48	SAC0529	sinense	TEKCHA OKINAWA	china
	SAC0575	unknown	RHEQ	Unknown
Group49	SAC0538	officinarum	BA 11569	Barbados
	SAC0601	robustum	IJ 76-480	Barbados
Group50	SAC0559	unknown	UNKNOWN	Unknown
	SAC0714	hybrid	CO 0975	Unknown
Group51	SAC0561	hybrid	CP 65-357	US
	SAC0588	hybrid	CP 89-2143	US
Group52	SAC0564	unknown	UNKNOWN 1995 R55 P36	Unknown
	SAC0565	unknown	UNKNOWN	Unknown
Group53	SAC0577	officinarum	CHINO	US
	SAC0613	sinense	CHUK CHE	china
Group54	SAC0591	hybrid	UNKNOWN SAC. HYBRID	Unknown
	SAC0762	unknown	IJ 76-426	Unknown
Group55	SAC0612	unknown	KAYANA 10	Unknown
	SAC0732	barberi	White Pararia	Unknown
Group56	SAC0644	unknown	7628	Unknown
	SAC0689	robustum	IM 76-228	Unknown
Group57	SAC0661	hybrid	R 570	Unknown
	SAC0769	unknown	RSB 90-22	Unknown
Group58	SAC0664	officinarum	IJ 76-477	Barbados
	SAC0757	officinarum	IJ 76-477 IJ 76-447 on pot	Unknown
Group59	SAC0707	hybrid	CO 0997	Unknown
	SAC0743	unknown	CO 6502	Unknown
Group60	SAC0790	spontaneum	US 56-0019-01; -03	Thailand
	SAC271	sinense	Oshima	Japan
Group61	SAC0793	spontaneum	US 57-172-3	Barbados
	SAC0814	spontaneum	US 57-11-2	Barbados
Group62	SAC0794	unknown	CPGN 84-2-9678	Pakistan
	SAC1268	spontaneum	SES 521	India
Group63	SAC0853	spontaneum	75-3-1 5 7	Barbados
	SAC0862	spontaneum	US 56-19-1	Barbados
Group64	SAC0940	spontaneum	Spont 43-60	Unknown
	SAC0985	spontaneum	PCA NOR 84-4	Brazil
Group65	SAC0949	spontaneum	IN 84-39	Brazil
	SAC1007	spontaneum	SES 295	India
Group66	SAC0951	spontaneum	IND 81-013	India
	SAC0963	spontaneum	IND. 81-132	Unknown
Group67	SAC0977	spontaneum	MQ 60 1953	Unknown
	SAC1082	spontaneum	Nepal	Papua New Guinea
Group68	SAC0981	spontaneum	IK 76-66	Barbados
	SAC1053	spontaneum	IK 76-72	Barbados
Group69	SAC098	officinarum	Green German	India
	SAC113	officinarum	Ng 21 035	Papua New Guinea
Group70	SAC1006	spontaneum	SES 275	India
	SAC1263	spontaneum	SES 275	India
Group71	SAC1020	spontaneum	Taiwan Spont 002	Taiwan
	SAC1275	spontaneum	Taiwan spont 002	Taiwan
Group72	SAC1047	spontaneum	IM 76-238	Indonesia
	SAC1049	spontaneum	IN84-010	Indonesia
Group73	SAC1058	spontaneum	IN84-091	Indonesia
	SAC1059	spontaneum	IND-81-9	India
Group74	SAC1083	spontaneum	Okinawa # 01	Japan
	SAC1084	spontaneum	P-Dav 84-1	Philippines
Group75	SAC1108	spontaneum	SES 014	India
	SAC1124	spontaneum	SES 014	India
Group76	SAC1109	spontaneum	Iran spont	Iran
	SAC1249	spontaneum	SES 251	India
Group77	SAC119	officinarum	Ng 77-016	Papua New Guinea
	SAC120	officinarum	Puri	Indonesia
Group78	SAC1232	spontaneum	SLC.92-82	Sri Lanka
	SAC1235	spontaneum	SLC.92-85	Sri Lanka
Group79	SAC1251	spontaneum	SES 264	India
	SAC1252	spontaneum	SES 270	India
Group80	SAC1255	spontaneum	SES 289C	India
	SAC1256	spontaneum	SES 294	India
Group81	SAC1483	hybrid	US 67-22-2	US
	SAC1485	hybrid	US 67-22-2	US
Group82	SAC166	robustum	Ij 76-482	Indonesia
	SAC200	robustum	Ij 76-496	Indonesia
Group83	SAC212	spontaneum	S. spont # 22	Unknown
	SAC282	spontaneum	Unk (2009)	Unknown
Group84	SAC214	spontaneum	Ses 072	India
	SAC234	spontaneum	SES 073	India
Group85	SAC268	unknown	NG 57-053	Papua New Guinea
	SAC279	officinarum	NG 28-279	Unknown
Group86	SAC270	sinense	Lu cane	china
	SAC277	barberi	Chin	Unknown

## Sheet: Table S4
Table S4. List of near-identical Saccharum accessions
Group	Sample.name	Sccharum.species	Clone.Name	Source of introduction
Group1	SAC0435	unknown	CP 91-555	US
	SAC0472	sinense	UBA NAQUIN	US
	SAC0475	unknown	UNKNOWN (1995: R37-PO46)	Unknown
	SAC0496	unknown	UNKNOWN (1995: R65-P41)	Unknown
	SAC0513	sinense	NEPAL 3	Nepal
	SAC0515	sinense	KERAH	Indonesia
	SAC0518	sinense	CHINA	South Africa
	SAC0519	sinense	AGAUL	South Africa
	SAC0531	sinense	TANZHOU	china
	SAC0563	unknown	UNKNOWN 1995 R65-P38	Unknown
	SAC0564	unknown	UNKNOWN 1995 R55 P36	Unknown
	SAC0565	unknown	UNKNOWN	Unknown
	SAC0581	barberi	DARK PINDARIA	India
	SAC0615	sinense	MANEIRA	India
	SAC0616	sinense	MCILKRUM	US
	SAC0617	unknown	UNKNOWN 71-20	Unknown
	SAC0619	sinense	MERTHI	India
	SAC0620	sinense	MERTHI ZELL	Cuba
	SAC0621	sinense	OSHIMA	Japan
	SAC0622	sinense	NEPAL 3	Nepal
	SAC0646	sinense	TANZHOU	US
	SAC0651	sinense	MANKIA	India
	SAC0670	barberi	Kinar	India
	SAC0711	sinense	Uba Striped	Unknown
	SAC0717	barberi	Baroukha 239	Unknown
	SAC0727	sinense	Tanzhou Bamboo Cane	Unknown
	SAC0735	officinarum	Uba Del Natal	Unknown
	SAC0760	sinense	Cayana 10	Unknown
	SAC119	officinarum	Ng 77-016	Papua New Guinea
	SAC120	officinarum	Puri	Indonesia
	SAC121	officinarum	Pundia	Cuba
	SAC126	robustum	Ng 77-136	Guadeloupe
	SAC172	barberi	Khagzi	India
	SAC178	sinense	Tukuyu Dist. No. 1	Tanzania
	SAC179	sinense	Uba India	India
	SAC184	sinense	Pansahi 204	India
	SAC186	barberi	Khagzi	India
	SAC256	officinarum	Pundia	Cuba
Group2	SAC0326	officinarum	NG 57-072	Papua New Guinea
	SAC0333	officinarum	NG 51 042	Papua New Guinea
	SAC0334	officinarum	NG 51 038	Papua New Guinea
	SAC0417	barberi	GANAPATHY	India
	SAC0612	unknown	KAYANA 10	Unknown
	SAC0627	barberi	KHATUIA	India
	SAC0628	barberi	KUSWAR	India
	SAC0673	barberi	Matki Mango	India
	SAC0686	barberi	Rakhra	Unknown
	SAC0722	barberi	New Siberian (Paunra)	Unknown
	SAC0731	barberi	Pathri	Unknown
	SAC0732	barberi	White Pararia	Unknown
	SAC142	barberi	Rounda	India
	SAC187	barberi	Ganapathy	India
	SAC253	officinarum	NG 28-213	Papua New Guinea
Group3	SAC0357	officinarum	P-MAG-84-13	Philippines
	SAC0358	officinarum	P-MAG-84-2	Philippines
	SAC1470	officinarum	P-Mag-84-2-North_infected_offshoot	Philippines
	SAC1471	officinarum	P-Mag-84-2-North_clean_terminal	Philippines
	SAC1472	officinarum	P-Mag-84-2-North_infected_offshoot	Philippines
	SAC1473	officinarum	P-Mag-84-2-North_clean_offshoot	Philippines
	SAC1474	officinarum	P-Mag-84-2-North_infected_offshoot	Philippines
	SAC1475	officinarum	P-Mag-84-2-North_clean_offshoot	Philippines
	SAC1476	officinarum	P-Mag-84-2-North_clean_offshoot	Philippines
	SAC1477	officinarum	P-Mag-84-2-North_clean_terminal	Philippines
	SAC1478	officinarum	P-Mag-84-2-South_clean_terminal	Philippines
	SAC1479	officinarum	P-Mag-84-2-South_clean_terminal	Philippines
	SAC1480	officinarum	P-Mag-84-2-South_clean_offshoot	Philippines
	SAC1481	officinarum	P-Mag-84-2-South_clean_offshoot	Philippines
Group4	SAC0321	robustum	IN 84-045	Barbados
	SAC0425	barberi	MESANGEN	Guyana
	SAC0426	robustum	IN 84-045	Barbados
	SAC0442	unknown	IJ 76-236	Unknown
	SAC0458	officinarum	HORNE	Barbados
	SAC0460	robustum	IJ 76-414	Barbados
	SAC0461	robustum	NG 28-251	Guadeloupe
	SAC0476	unknown	UNKNOWN	Unknown
	SAC109	officinarum	Madera	Spain
	SAC143	unknown	Im 76-236	Unknown
	SAC163	robustum	In 84-045	Barbados
Group5	SAC0336	robustum	NG 57-208	Unknown
	SAC0347	robustum	NG 57-238	Barbados
	SAC0427	robustum	NG 57-238	Barbados
	SAC0430	robustum	NG 28-289	Papua New Guinea
	SAC0446	robustum	NG 57-238	Barbados
	SAC0598	robustum	NG 57-238	Barbados
	SAC115	robustum	Ng 28-289	Papua New Guinea
	SAC133	unknown	Unk R39 P49	Unknown
	SAC141	unknown	T 4594443	Unknown
	SAC173	robustum	Ng 57-012	US
	SAC260	robustum	NG 77-094	Papua New Guinea
Group6	SAC0337	hybrid	US 67-22-2	US
	SAC0407	hybrid	US 67-22-2	US
	SAC0408	hybrid	US 67-22-2	US
	SAC0592	unknown	CRIANA	Unknown
	SAC1482	hybrid	US 67-22-2	US
	SAC1483	hybrid	US 67-22-2	US
	SAC1484	hybrid	US 67-22-2	US
	SAC1485	hybrid	US 67-22-2	US
	SAC1486	hybrid	US 67-22-2	US
Group7	SAC0330	robustum	NG 77-021	Papua New Guinea
	SAC0405	robustum	NG 77-021	Guadeloupe
	SAC0429	robustum	NG 77-021	Guadeloupe
	SAC0465	robustum	NG 77-021	Guadeloupe
	SAC0501	robustum	NG 77-21	Barbados
	SAC0595	robustum	NG 77-21	Barbados
	SAC0624	unknown	POJ028	Unknown
	SAC0625	robustum	NG 77-021	Guadeloupe
Group8	SAC0332	unknown	IK 76-77	Unknown
	SAC0343	spontaneum	IK 76-72	Barbados
	SAC0744	robustum	IN 84-052	Unknown
	SAC0797	spontaneum	IK 76-74	Barbados
	SAC0863	spontaneum	IK 76-71	Barbados
	SAC0981	spontaneum	IK 76-66	Barbados
	SAC1046	spontaneum	IK 76-067	US
	SAC1053	spontaneum	IK 76-72	Barbados
Group9	SAC0794	unknown	CPGN 84-2-9678	Pakistan
	SAC0795	spontaneum	Pasuruan	Barbados
	SAC1041	spontaneum	Formosa No. 4	Taiwan
	SAC1042	spontaneum	Gehra-Bon	India
	SAC1266	spontaneum	SES 501	India
	SAC1267	spontaneum	SES 517	India
	SAC1268	spontaneum	SES 521	India
Group10	SAC0297	officinarum	CHU-ZHE	Unknown
	SAC0308	officinarum	IK 76-069	Australia
	SAC0310	officinarum	IJ76-418B	US
	SAC0312	officinarum	IJ 76-316	Indonesia
	SAC0489	robustum	IJ 76-435	Indonesia
	SAC0691	hybrid	COS 510	Unknown
Group11	SAC0453	hybrid	FIJI 53	Fiji
	SAC0493	unknown	KT 730	US
	SAC0497	unknown	MOL 6446	US
	SAC0530	unknown	UNKNOWN 68-21 (765)	Unknown
	SAC0551	unknown	MOL 6427	US
	SAC0569	unknown	MOL 6427	US
Group12	SAC0307	officinarum	IK 76-108	Australia
	SAC0308	officinarum	IK 76-069	Australia
	SAC0310	officinarum	IJ76-418B	US
	SAC0489	robustum	IJ 76-435	Indonesia
	SAC0691	hybrid	COS 510	Unknown
Group13	SAC0354	officinarum	8272	Malaysia
	SAC0375	unknown	UNKNOWN (1995: R45-P078)	Unknown
	SAC0450	hybrid	H 32-8560	US
	SAC0470	officinarum	UAHI A PELE 50	US
	SAC156	hybrid	F 160	Taiwan
Group14	SAC0390	unknown	UNKNOWN	Unknown
	SAC0528	officinarum	UNKNOWN S. OFF.	Unknown
	SAC0591	hybrid	UNKNOWN SAC. HYBRID	Unknown
	SAC0676	officinarum	NG 51 97	Unknown
	SAC0762	unknown	IJ 76-426	Unknown
Group15	SAC0424	robustum	NG 77-122	Barbados
	SAC0514	barberi	MESANGEN	Guyana
	SAC0614	sinense	KAVANGIRE	Argentina
	SAC0618	unknown	MORTHI	Unknown
	SAC0629	barberi	MANGWA	India
Group16	SAC0484	unknown	CP R1 X P1	Unknown
	SAC0663	officinarum	NG 21 049	Papua New Guinea
	SAC098	officinarum	Green German	India
	SAC113	officinarum	Ng 21 035	Papua New Guinea
	SAC165	unknown	R 45 Pt 107	Unknown
Group17	SAC0559	unknown	UNKNOWN	Unknown
	SAC0707	hybrid	CO 0997	Unknown
	SAC0714	hybrid	CO 0975	Unknown
	SAC0733	unknown	CO 6304	Unknown
	SAC0743	unknown	CO 6502	Unknown
Group18	SAC0855	spontaneum	NG US 56-19-3	Barbados
	SAC0870	unknown	US 56-15-1	Pakistan
	SAC1023	spontaneum	US 56-15-08	Thailand
	SAC1225	unknown	Q 6947108	Unknown
	SAC204	unknown	unknown	Unknown
Group19	SAC0977	spontaneum	MQ 60 1953	Unknown
	SAC0978	spontaneum	NG 51-025	Papua New Guinea
	SAC1039	spontaneum	Burma	India
	SAC1082	spontaneum	Nepal	Papua New Guinea
	SAC1101	spontaneum	Rellagadi	India
Group20	SAC0992	spontaneum	S 66-101	Taiwan
	SAC0997	spontaneum	S. spont # 28	Unknown
	SAC1026	hybrid	US 74-0069	Unknown
	SAC1306	spontaneum	US 78-519	Pakistan
	SAC232	spontaneum	S 66-121	Taiwan
Group21	SAC1128	spontaneum	SLC.92-62	Sri Lanka
	SAC1129	spontaneum	SLC.92-32	Sri Lanka
	SAC1132	spontaneum	SLC.92-98	Sri Lanka
	SAC1232	spontaneum	SLC.92-82	Sri Lanka
	SAC1235	spontaneum	SLC.92-85	Sri Lanka
Group22	SAC0300	officinarum	IK 76-065	US
	SAC0473	unknown	UNKNOWN (1995: R65-P25)	Unknown
	SAC0562	unknown	UNKNOWN	Unknown
	SAC0642	unknown	UNKNOWN 1995: R65 P25	Unknown
Group23	SAC0323	officinarum	NG 28-014 (SS 58-08)	Papua New Guinea
	SAC0436	robustum	NG 57-208	US
	SAC0447	robustum	NG 57-208	US
	SAC1234	robustum	NG 57-208	US
Group24	SAC0379	unknown	UNKNOWN (1995: R56-P24)	Unknown
	SAC0380	unknown	UNKNOWN (1995: R56-P50)	Unknown
	SAC0626	unknown	UNKNOWN 1995: R43 PO25	Unknown
	SAC0657	hybrid	US 71-53-01	Taiwan
Group25	SAC0395	robustum	IJ 76-414	Barbados
	SAC0421	officinarum	MAURITIOUS GUINGHAM	Guadeloupe
	SAC0422	officinarum	MOGALI	Barbados
	SAC0708	robustum	Molokai 5099	Unknown
Group26	SAC0511	officinarum	HC 71	US
	SAC0721	officinarum	Halalii	Unknown
	SAC268	unknown	NG 57-053	Papua New Guinea
	SAC279	officinarum	NG 28-279	Unknown
Group27	SAC0524	unknown	F 31-436	Unknown
	SAC0583	hybrid	R 397	India
	SAC0608	unknown	F31-762	US
	SAC0706	unknown	F 31-762	Unknown
Group28	SAC0539	hybrid	M 093/48	Mauritius
	SAC0654	unknown	UNKNOWN R 56 P 28	Unknown
	SAC0728	hybrid	M 63/39	Unknown
	SAC0766	hybrid	M 555/60	Unknown
Group29	SAC0586	unknown	7628	Unknown
	SAC0644	unknown	7628	Unknown
	SAC0689	robustum	IM 76-228	Unknown
	SAC0740	robustum	IM 76-232	Unknown
Group30	SAC0789	spontaneum	78-2-1+2+3	Barbados
	SAC0853	spontaneum	75-3-1 5 7	Barbados
	SAC0862	spontaneum	US 56-19-1	Barbados
	SAC0865	spontaneum	76-1-7+8+9	Barbados
Group31	SAC0980	spontaneum	Okinawa No. 13	Unknown
	SAC1000	spontaneum	SES 092	India
	SAC1083	spontaneum	Okinawa # 01	Japan
	SAC1084	spontaneum	P-Dav 84-1	Philippines
Group32	SAC1107	spontaneum	SES 004A	India
	SAC1307	spontaneum	US 78-522	Pakistan
	SAC1308	spontaneum	US 78-523	Pakistan
	SAC1309	spontaneum	US 78-526	Pakistan
Group33	SAC1109	spontaneum	Iran spont	Iran
	SAC1249	spontaneum	SES 251	India
	SAC214	spontaneum	Ses 072	India
	SAC234	spontaneum	SES 073	India
Group34	SAC1250	spontaneum	SES 260	India
	SAC1251	spontaneum	SES 264	India
	SAC1252	spontaneum	SES 270	India
	SAC1257	spontaneum	SES 297A	India
Group35	SAC0288	officinarum	AKOKI 22	US
	SAC0289	officinarum	ANOMAN	Papua New Guinea
	SAC0469	officinarum	AKOKI 22	US
Group36	SAC0296	officinarum	BADILLA	Unknown
	SAC0505	officinarum	BADILA	Unknown
	SAC0730	barberi	Newra	Unknown
Group37	SAC0301	officinarum	FIJI	Unknown
	SAC0645	unknown	DON CICO	Unknown
	SAC0758	unknown	F 31-407	Unknown
Group38	SAC0309	officinarum	IJ 76-521	Australia
	SAC0339	officinarum	NG 28 099	Papua New Guinea
	SAC168	unknown	Unknown (1995- R65-P50)	Unknown
Group39	SAC0316	officinarum	MANTEIGA	Unknown
	SAC0420	officinarum	MANJRI RED	Barbados
	SAC0623	officinarum	MANJRI RED	Barbados
Group40	SAC0320	robustum	IJ 76-547	Barbados
	SAC0478	officinarum	BISCUIT	Guadeloupe
	SAC0479	officinarum	BISCUIT	Guadeloupe
Group41	SAC0322	robustum	IJ 76-547	Guadeloupe
	SAC0328	robustum	IN 81-014	Barbados
	SAC0480	robustum	IN 81-014	Barbados
Group42	SAC0340	officinarum	NG 28-087 O.P. PLANT 3	Unknown
	SAC0459	hybrid	PR 0980	Puerto Rico
	SAC0771	hybrid	SP 70-1143	Unknown
Group43	SAC0342	officinarum	BA 11569	Barbados
	SAC0538	officinarum	BA 11569	Barbados
	SAC0601	robustum	IJ 76-480	Barbados
Group44	SAC0352	officinarum	NG 77-092	Papua New Guinea
	SAC0376	unknown	UNKNOWN (1995: R45-P109)	Unknown
	SAC0611	unknown	R567	Unknown
Group45	SAC0360	officinarum	8276	Malaysia
	SAC0366	officinarum	8275	Malaysia
	SAC0374	unknown	UNKNOWN (1995: R43-P023)	Unknown
Group46	SAC0369	officinarum	SPAANSCH	US
	SAC0373	officinarum	UM 68-010	Malaysia
	SAC0404	unknown	UNKNOWN (1995) R 59 P 33	Unknown
Group47	SAC0389	barberi	REORI	India
	SAC0672	barberi	Khari	India
	SAC0718	barberi	Khari	Unknown
Group48	SAC0397	unknown	UNKNOWN 45-88	Unknown
	SAC0499	unknown	UNKNOWN (1995: R65-P57)	Unknown
	SAC104	officinarum	Ik 76-059	Australia
Group49	SAC0406	hybrid	H 83-6147	US
	SAC0525	unknown	H 87-4319	Unknown
	SAC0540	hybrid	H 83-6147	US
Group50	SAC0444	robustum	S. ROBUSTUM	Unknown
	SAC0599	robustum	NG 77-54	Barbados
	SAC0662	robustum	NG 77-054	Papua New Guinea
Group51	SAC0449	robustum	MOL 6077	US
	SAC0481	robustum	MOL 6077	US
	SAC161	unknown	43-188	Unknown
Group52	SAC0495	unknown	UBA IPORANGA	Brazil
	SAC0529	sinense	TEKCHA OKINAWA	china
	SAC0575	unknown	RHEQ	Unknown
Group53	SAC0506	unknown	CO 0727	Unknown
	SAC0638	officinarum	BA 11569	Barbados
	SAC0716	unknown	BALL 569	Unknown
Group54	SAC0512	sinense	SINENSE	India
	SAC0647	sinense	JAPONESA	Costa Rica
	SAC188	sinense	Japonesa	Costa Rica
Group55	SAC0532	sinense	LOUJE	US
	SAC0684	hybrid	B 49119	Unknown
	SAC0725	robustum	US 57-159-13	Unknown
Group56	SAC0555	unknown	CP 92-1666	US
	SAC0561	hybrid	CP 65-357	US
	SAC0588	hybrid	CP 89-2143	US
Group57	SAC0558	unknown	NG 26-011	Unknown
	SAC0584	hybrid	CO 270	India
	SAC0671	robustum	MOL 6091	US
Group58	SAC0566	unknown	UNKNOWN 1995 R 65 P34	Unknown
	SAC0567	unknown	UNKNOWN 1995 R37 P042	Unknown
	SAC100	officinarum	Javari Kabbu	Unknown
Group59	SAC0568	hybrid	R570	Unknown
	SAC0661	hybrid	R 570	Unknown
	SAC0769	unknown	RSB 90-22	Unknown
Group60	SAC0858	spontaneum	Aegypticum	Barbados
	SAC1037	spontaneum	IN 76-086	Unknown
	SAC220	unknown	Taiwan 120	Brazil
Group61	SAC0940	spontaneum	Spont 43-60	Unknown
	SAC0941	spontaneum	SES 519	Unknown
	SAC0985	spontaneum	PCA NOR 84-4	Brazil
Group62	SAC0944	spontaneum	IJ 76-125	Unknown
	SAC0946	spontaneum	IJ 76-421	Unknown
	SAC0972	spontaneum	IS 76-125	Indonesia
Group63	SAC0949	spontaneum	IN 84-39	Brazil
	SAC1007	spontaneum	SES 295	India
	SAC216	spontaneum	Ses 297A	India
Group64	SAC1006	spontaneum	SES 275	India
	SAC1072	spontaneum	IS 76-154	US
	SAC1263	spontaneum	SES 275	India
Group65	SAC1009	spontaneum	SES 513	India
	SAC1298	spontaneum	US 78-502	Pakistan
	SAC1299	spontaneum	US 78-504	Pakistan
Group66	SAC1010	spontaneum	SES 606	India
	SAC1110	spontaneum	SES 033	India
	SAC1111	spontaneum	SES 060	India
Group67	SAC1038	spontaneum	SES 197A	India
	SAC138	sinense	Kerah	Indonesia
	SAC192	sinense	Kerah	Indonesia
Group68	SAC1047	spontaneum	IM 76-238	Indonesia
	SAC1048	spontaneum	IN84-009	Indonesia
	SAC1049	spontaneum	IN84-010	Indonesia
Group69	SAC0292	officinarum	BANDJARMASIN HITAM	Indonesia
	SAC0318	officinarum	MUNTOK JAVA	Indonesia
Group70	SAC0302	hybrid	BO 11	India
	SAC0694	hybrid	BO 14	Unknown
Group71	SAC0303	officinarum	HAWAIIAN ORIGINAL	Taiwan
	SAC0314	officinarum	HIND'S SPECIAL	Philippines
Group72	SAC0327	robustum	NG 77-094	Guadeloupe
	SAC0396	robustum	NG 77-094	Papua New Guinea
Group73	SAC0349	officinarum	NG 77-042	Papua New Guinea
	SAC0359	officinarum	PADANGSCHE DARK RED	Spain
Group74	SAC0350	unknown	UNKNOWN #1	Unknown
	SAC0653	unknown	CP 91-555	US
Group75	SAC0351	unknown	UNKNOWN	Unknown
	SAC0474	robustum	NG 77-39	Barbados
Group76	SAC0362	officinarum	NG 77-182	Papua New Guinea
	SAC0363	officinarum	NG 77-154	Papua New Guinea
Group77	SAC0364	officinarum	NG 77-137	Papua New Guinea
	SAC0403	unknown	UNKNOWN	Unknown
Group78	SAC0368	officinarum	SAIPAN	India
	SAC0715	officinarum	NG 57-59	Unknown
Group79	SAC0385	officinarum	VELLAI	Brazil
	SAC0437	hybrid	CP 44-0155	US
Group80	SAC0393	hybrid	CG 98-10	Guatemala
	SAC0438	hybrid	CG 98-10	Guatemala
Group81	SAC0394	officinarum	NG 57-030	Guadeloupe
	SAC0423	officinarum	NG 57-030	Guadeloupe
Group82	SAC0411	unknown	UNKNOWN 45-60 TRELLIS	Unknown
	SAC0502	unknown	B 69691	Unknown
Group83	SAC0412	unknown	UNKNOWN 45-66	Unknown
	SAC0498	unknown	UNKNOWN (1995: R65-P47)	Unknown
Group84	SAC0418	hybrid	CG02-163	Guatemala
	SAC0593	hybrid	CG02-163	Guatemala
Group85	SAC0431	hybrid	DI 52	Indonesia
	SAC0665	hybrid	Diamond 10	Barbados
Group86	SAC0440	hybrid	ZN 10	Zimbabwe
	SAC0492	officinarum	HC 71	US
Group87	SAC0445	hybrid	CO 213	India
	SAC0466	unknown	CG 97-100	Guatemala
Group88	SAC0448	unknown	TOBOE SALAK TOEWA	Brazil
	SAC0695	edule	IJ 76-337	Unknown
Group89	SAC0456	hybrid	P 57-150-4	Cuba
	SAC0500	unknown	UNKNOWN (1995: R34-P16)	Unknown
Group90	SAC0457	hybrid	POJ 2753	Indonesia
	SAC0685	unknown	Ragnar	Unknown
Group91	SAC0468	edule	IJ 76-375	Indonesia
	SAC0491	edule	IJ 76-375	Indonesia
Group92	SAC0471	sinense	AGOULE	India
	SAC0520	unknown	US 95-1024	Unknown
Group93	SAC0477	hybrid	PT 33-0085	Guam
	SAC0640	hybrid	POJ 2725	Indonesia
Group94	SAC0485	robustum	IN 81-014	Barbados
	SAC0697	robustum	IN 84-050	Unknown
Group95	SAC0487	unknown	CPCL 99-1401	Unknown
	SAC0770	hybrid	CO 0331	Unknown
Group96	SAC0490	robustum	FIJI 1	Australia
	SAC0527	unknown	F 177	Taiwan
Group97	SAC0494	officinarum	UB 14	US
	SAC0655	hybrid	US 71-53-01	Taiwan
Group98	SAC0509	unknown	CP 91-555	US
	SAC0693	unknown	CP 91-055	Unknown
Group99	SAC0547	hybrid	UNKNOWN SAC. HYBRID	Unknown
	SAC0687	robustum	M 3035/66	Unknown
Group100	SAC0552	unknown	CP 01-1372	US
	SAC0553	unknown	CP 01-1372	US
Group101	SAC0577	officinarum	CHINO	US
	SAC0613	sinense	CHUK CHE	china
Group102	SAC0635	hybrid	CO 313	South Africa
	SAC0636	hybrid	CO 312	South Africa
Group103	SAC0637	hybrid	B54-142	Barbados
	SAC0700	hybrid	B 54142	Unknown
Group104	SAC0658	hybrid	VOMA	Unknown
	SAC0681	hybrid	US 71-0501	Unknown
Group105	SAC0664	officinarum	IJ 76-477	Barbados
	SAC0757	officinarum	IJ 76-477 IJ 76-447 on pot	Unknown
Group106	SAC0690	robustum	IN 84-076	Unknown
	SAC0701	robustum	IS 76-184	Unknown
Group107	SAC0790	spontaneum	US 56-0019-01; -03	Thailand
	SAC271	sinense	Oshima	Japan
Group108	SAC0793	spontaneum	US 57-172-3	Barbados
	SAC0814	spontaneum	US 57-11-2	Barbados
Group109	SAC0860	spontaneum	US 59-0001-01	Philippines
	SAC0867	spontaneum	B 68269	Barbados
Group110	SAC0948	spontaneum	IN 84-35	Unknown
	SAC0989	spontaneum	PCAV 84-06	Brazil
Group111	SAC0951	spontaneum	IND 81-013	India
	SAC0963	spontaneum	IND. 81-132	Unknown
Group112	SAC0993	spontaneum	S. spont # 02	Unknown
	SAC1273	spontaneum	S. spont # 22	Malaysia
Group113	SAC0995	spontaneum	S. spont # 17	Unknown
	SAC1028	spontaneum	US 78-511	Pakistan
Group114	SAC1005	unknown	SES 269	India
	SAC1019	spontaneum	Tainan 2n=096	Guam
Group115	SAC1011	spontaneum	SES 084/58	India
	SAC1237	spontaneum	SES 084/58	India
Group116	SAC1012	spontaneum	SM 7916	Unknown
	SAC1118	unknown	SM 8136	Unknown
Group117	SAC1020	spontaneum	Taiwan Spont 002	Taiwan
	SAC1275	spontaneum	Taiwan spont 002	Taiwan
Group118	SAC1034	spontaneum	SES 113A	India
	SAC1242	spontaneum	SES 113 A	Brazil
Group119	SAC1043	spontaneum	Gugu	Kenya
	SAC1288	spontaneum	US 56-009-04	Thailand
Group120	SAC1058	spontaneum	IN84-091	Indonesia
	SAC1059	spontaneum	IND-81-9	India
Group121	SAC1108	spontaneum	SES 014	India
	SAC1124	spontaneum	SES 014	India
Group122	SAC1123	spontaneum	SES 316	India
	SAC1259	spontaneum	SES 323	India
Group123	SAC1130	spontaneum	SES 234	Malaysia
	SAC1248	spontaneum	SES 234	Malaysia
Group124	SAC1224	spontaneum	Formosa 4	Barbados
	SAC1247	spontaneum	SES 220	India
Group125	SAC1239	spontaneum	SES 090	India
	SAC1241	spontaneum	SES 103	India
Group126	SAC1255	spontaneum	SES 289C	India
	SAC1256	spontaneum	SES 294	India
Group127	SAC1260	spontaneum	SES 365	India
	SAC1261	spontaneum	SES 366	India
Group128	SAC140	barberi	Matna Shahj	India
	SAC253	officinarum	NG 28-213	Papua New Guinea
Group129	SAC166	robustum	Ij 76-482	Indonesia
	SAC200	robustum	Ij 76-496	Indonesia
Group130	SAC189	hybrid	Cos 245	India
	SAC274	hybrid	CO 1148	India
Group131	SAC201	spontaneum	Unknown (2009: R37-P052)	Unknown
	SAC218	spontaneum	SES 519	India
Group132	SAC206	spontaneum	IN 84-089	Indonesia
	SAC225	spontaneum	IN84-088	Indonesia
Group133	SAC212	spontaneum	S. spont # 22	Unknown
	SAC282	spontaneum	Unk (2009)	Unknown
Group134	SAC240	officinarum	IJ 76-478	Indonesia
	SAC276	officinarum	IJ 76-478	Indonesia
Group135	SAC270	sinense	Lu cane	china
	SAC277	barberi	Chin	Unknown

## Sheet: Table S5
Table S5. The cumulative Probability of Identity among siblings (PID-sib) of 357 SNPs in five Saccharum species. PID-sib is defined as the probability that two sibling individuals drawn at random from a population have the same mutilocus genotype (Waits et al., 2001). Rresult s of the first 48 SNPs were marked in blue color.
SNP No.	SNP name	S. spontaneum	S. barberi	S. robustum	S. officinarum	S. sinense
1	AX-117226049-3153::Chr4C:26667761-26668062	0.691933	1	0.984821	0.730689	0.594149
2	AX-117226049-3355::Chr4D:27679740-27680041	0.478771	1	0.969873	0.533907	0.353013
3	AX-117296680-2443::Chr3C:76789817-76790118	0.478771	1	0.618872	0.429058	0.209601
4	AX-117872199-5688::Chr8C:10407925-10408226	0.285122	0.904006	0.449015	0.283365	0.209601
5	AX-117872199-5948::Chr8D:9703645-9703946	0.169798	0.817227	0.325778	0.187144	0.209601
6	AX-117911226-1754::Chr2D:7072106-7072407	0.167272	0.521305	0.249241	0.162595	0.124451
7	AX-117952257-1434::Chr2C:17557422-17557723	0.167272	0.313616	0.177336	0.108363	0.0738927
8	AX-117952257-1797::Chr2D:9770585-9770886	0.167272	0.188671	0.126176	0.0722192	0.0438738
9	AX-118001417-2405::Chr3C:57501449-57501750	0.167272	0.116192	0.0924774	0.0440327	0.02605
10	AX-118036023-2110::Chr3B:42052271-42052572	0.166435	0.116192	0.085827	0.0361928	0.0159855
11	AX-118036023-2542::Chr3D:21013336-21013637	0.165602	0.116192	0.079655	0.0297487	0.00980949
12	AX-118039895-4946::Chr7B:24331336-24331637	0.105367	0.0689887	0.0761241	0.0188802	0.00582438
13	AX-118039895-5254::Chr7D:22844860-22845161	0.0671714	0.040962	0.0727498	0.0119824	0.00345823
14	AX-118044918-4526::Chr6C:53834298-53834599	0.0624315	0.040962	0.0544507	0.00892291	0.00345823
15	AX-118044918-4669::Chr6D:48985755-48986056	0.0580262	0.040962	0.0407545	0.0066446	0.00345823
16	AX-118058129-1799::Chr2D:97911248-97911549	0.0563222	0.040962	0.0401359	0.00507017	0.00345823
17	AX-118104121-5712::Chr8C:15189005-15189306	0.0554843	0.0324032	0.0347397	0.00316542	0.00205332
18	AX-118104121-5818::Chr8D:12169746-12170047	0.0546588	0.0256326	0.030069	0.00197624	0.00121916
19	AX-171236797-1502::Chr2C:40486126-40486427	0.0392169	0.0152194	0.0230047	0.00119305	0.000723877
20	AX-171236797-1686::Chr2D:31400001-31400302	0.0281375	0.0090365	0.0176001	0.000720241	0.000429802
21	AX-171237156-1239::Chr2B:24543781-24544082	0.0207707	0.00556505	0.0176001	0.00058752	0.000255195
22	AX-171237156-1655::Chr2D:20723435-20723736	0.0152289	0.00342718	0.0176001	0.000479257	0.000151522
23	AX-171237461-5939::Chr8D:66799906-66800207	0.0119713	0.00342718	0.0176001	0.000430536	0.000151522
24	AX-171238362-4693::Chr6D:60837756-60838057	0.00720542	0.0021106	0.0161016	0.000286934	8.99661e-05
25	AX-171238668-3657::Chr5B:12829702-12830003	0.00692577	0.0016696	0.0161016	0.000232307	8.99661e-05
26	AX-171238668-3961::Chr5D:20327664-20327965	0.00665697	0.00132074	0.0161016	0.00018808	8.99661e-05
27	AX-171239882-4089::Chr5D:79633194-79633495	0.00570232	0.00132074	0.0145236	0.000136587	8.99661e-05
28	AX-171240294-3423::Chr4D:62540314-62540615	0.00344464	0.00132074	0.0142998	9.47454e-05	8.99661e-05
29	AX-171240309-2612::Chr3D:43628248-43628549	0.00344464	0.000784189	0.0110648	5.88029e-05	5.34174e-05
30	AX-171240339-3328::Chr4D:2052203-2052504	0.00257238	0.000784189	0.00810967	4.3509e-05	3.17379e-05
31	AX-171240445-5144::Chr7C:5030963-5031264	0.00254675	0.000784189	0.00538946	3.68962e-05	3.17379e-05
32	AX-171240714-5162::Chr7C:61754934-61755235	0.00191527	0.000482936	0.00538946	3.58868e-05	1.91637e-05
33	AX-171240714-5324::Chr7D:54038989-54039290	0.00143028	0.000297412	0.00538946	3.45885e-05	1.13784e-05
34	AX-171241733-590::Chr1C:73348688-73348989	0.0013681	0.000176588	0.00479392	2.11864e-05	6.92146e-06
35	AX-171241733-858::Chr1D:69591045-69591346	0.00130863	0.000104849	0.00426419	1.29773e-05	4.2103e-06
36	AX-171243115-459::Chr1B:88400095-88400396	0.000883391	6.45704e-05	0.00277369	9.05074e-06	2.49987e-06
37	AX-171243115-892::Chr1D:85629654-85629955	0.000596334	3.97651e-05	0.00180418	6.31226e-06	1.4843e-06
38	AX-171243525-787::Chr1D:29355798-29356099	0.000427861	3.97651e-05	0.00180418	5.9223e-06	8.81301e-07
39	AX-171243646-792::Chr1D:31056208-31056509	0.000345703	3.97651e-05	0.00180418	5.65664e-06	8.81301e-07
40	AX-171243917-4651::Chr6D:4287042-4287343	0.000311011	3.97651e-05	0.00177679	4.13325e-06	8.81301e-07
41	AX-171244488-3676::Chr5B:16415756-16416057	0.000298941	3.97651e-05	0.00122996	3.8438e-06	5.23273e-07
42	AX-171244488-3987::Chr5D:23890075-23890376	0.000287338	3.97651e-05	0.000851427	3.57463e-06	3.10693e-07
43	AX-171246287-4066::Chr5D:61042423-61042724	0.00024938	3.97651e-05	0.000851427	2.81068e-06	3.10693e-07
44	AX-171247323-2523::Chr3D:15378342-15378643	0.000213617	2.4489e-05	0.000851427	2.78463e-06	3.10693e-07
45	AX-171247817-4714::Chr6D:7384069-7384370	0.000144969	2.4489e-05	0.000838504	2.28883e-06	3.10693e-07
46	AX-171247985-5866::Chr8D:33986728-33987029	0.000144969	2.4489e-05	0.000518418	1.62333e-06	3.10693e-07
47	AX-171248259-5871::Chr8D:37289471-37289772	8.60766e-05	1.45403e-05	0.000502891	1.01044e-06	1.84474e-07
48	AX-171250203-1625::Chr2D:12702568-12702869	8.5219e-05	8.74745e-06	0.000384744	6.73416e-07	1.09531e-07
49	AX-171250441-808::Chr1D:40925321-40925622	5.31984e-05	8.74745e-06	0.000304891	4.21732e-07	6.50343e-08
50	AX-171250699-1400::Chr2C:117196864-117197165	3.64992e-05	5.38704e-06	0.000295759	3.33993e-07	6.50343e-08
51	AX-171250699-1596::Chr2D:101921723-101922024	2.50419e-05	3.31756e-06	0.000282649	2.64508e-07	6.27831e-08
52	AX-171250713-2034::Chr3B:12066006-12066307	2.47924e-05	2.62436e-06	0.000278359	2.35615e-07	3.73777e-08
53	AX-171250713-2272::Chr3C:14944559-14944860	2.45442e-05	2.07601e-06	0.000274134	2.09879e-07	2.22527e-08
54	AX-171252809-4443::Chr6C:14689336-14689637	1.51287e-05	1.64224e-06	0.00026567	1.41892e-07	1.32125e-08
55	AX-171252809-4590::Chr6D:13505969-13506270	9.29933e-06	1.2991e-06	0.000257713	9.50082e-08	7.84495e-09
56	AX-171252876-2661::Chr3D:60607746-60608047	6.36257e-06	1.2991e-06	0.000257713	8.17682e-08	7.84495e-09
57	AX-171253774-3245::Chr4C:70505995-70506296	4.46744e-06	1.2991e-06	0.000257713	7.47268e-08	7.84495e-09
58	AX-171253774-3455::Chr4D:73602924-73603225	3.13678e-06	1.2991e-06	0.000257713	6.82917e-08	7.84495e-09
59	AX-171253968-5925::Chr8D:59369514-59369815	2.7964e-06	1.2991e-06	0.000257713	5.29443e-08	4.65794e-09
60	AX-171254606-2508::Chr3D:12884808-12885109	2.7548e-06	7.71338e-07	0.000153189	3.14357e-08	2.76565e-09
61	AX-171254834-2106::Chr3B:37753999-37754300	2.31959e-06	7.71338e-07	0.000153189	2.84822e-08	2.76565e-09
62	AX-171254834-2588::Chr3D:35130125-35130426	1.95315e-06	7.71338e-07	0.000153189	2.58062e-08	2.76565e-09
63	AX-171255371-629::Chr1C:91296107-91296408	1.70912e-06	7.71338e-07	0.000153189	1.96002e-08	2.76565e-09
64	AX-171255371-906::Chr1D:89141146-89141447	1.49559e-06	7.71338e-07	0.000153189	1.48867e-08	2.76565e-09
65	AX-171255470-5817::Chr8D:11587953-11588254	1.47334e-06	5.46899e-07	9.28935e-05	9.26621e-09	2.66992e-09
66	AX-171255521-4309::Chr6B:18776614-18776915	1.47334e-06	5.46899e-07	7.10695e-05	7.13418e-09	2.66992e-09
67	AX-171255521-4598::Chr6D:19197989-19198290	1.47334e-06	5.46899e-07	5.43727e-05	5.49271e-09	2.66992e-09
68	AX-171255825-5038::Chr7B:78022472-78022773	8.93621e-07	3.24721e-07	5.19626e-05	3.46219e-09	1.58526e-09
69	AX-171255825-5357::Chr7D:69122715-69123016	5.42007e-07	1.92803e-07	4.96593e-05	2.18231e-09	9.41251e-10
70	AX-171256355-5626::Chr8B:43336995-43337296	3.44436e-07	1.18736e-07	4.74581e-05	1.46823e-09	9.41251e-10
71	AX-171256355-5896::Chr8D:45356797-45357098	2.04729e-07	7.04996e-08	2.81817e-05	8.71799e-10	5.58868e-10
72	AX-171256409-4485::Chr6C:35008644-35008945	1.49789e-07	6.37321e-08	2.81817e-05	6.62145e-10	3.31828e-10
73	AX-171256409-4640::Chr6D:37666662-37666963	1.09592e-07	5.76142e-08	2.81817e-05	5.02909e-10	1.97023e-10
74	AX-171256533-3385::Chr4D:41188416-41188717	8.85484e-08	3.60576e-08	2.81817e-05	4.89151e-10	1.16982e-10
75	AX-171256984-732::Chr1D:115387319-115387620	5.67882e-08	2.85235e-08	2.7754e-05	4.08317e-10	6.95048e-11
76	AX-171256998-4067::Chr5D:63292031-63292332	5.67882e-08	2.85235e-08	2.73327e-05	3.33075e-10	6.95048e-11
77	AX-171257352-5321::Chr7D:51871064-51871365	4.10067e-08	1.69358e-08	2.69178e-05	2.96693e-10	4.12685e-11
78	AX-171257364-4591::Chr6D:17473506-17473807	4.10067e-08	1.69358e-08	1.78888e-05	2.75916e-10	4.12685e-11
79	AX-171257790-1515::Chr2C:43121496-43121797	3.98026e-08	1.33971e-08	1.76173e-05	2.13909e-10	4.12685e-11
80	AX-171257790-1703::Chr2D:36202212-36202513	3.86337e-08	1.05978e-08	1.73499e-05	1.65836e-10	4.12685e-11
81	AX-171258044-3258::Chr4C:74272942-74273243	3.86337e-08	1.05978e-08	1.5222e-05	1.05624e-10	4.12685e-11
82	AX-171258044-3465::Chr4D:77304241-77304542	3.84404e-08	1.05978e-08	1.3355e-05	6.70351e-11	4.12685e-11
83	AX-171258465-881::Chr1D:79942244-79942545	2.54936e-08	1.05978e-08	1.3355e-05	5.42728e-11	4.12685e-11
84	AX-171258829-5380::Chr7D:79615789-79616090	1.51444e-08	1.05978e-08	8.8099e-06	3.26063e-11	2.45032e-11
85	AX-171259328-1298::Chr2B:45165463-45165764	1.17129e-08	8.74258e-09	8.51514e-06	3.05919e-11	2.2113e-11
86	AX-171260253-4043::Chr5D:50389969-50390270	7.65888e-09	5.38404e-09	6.99657e-06	2.37169e-11	2.2113e-11
87	AX-171261078-827::Chr1D:51902569-51902870	7.47063e-09	5.38404e-09	5.74881e-06	1.41344e-11	1.31296e-11
88	AX-171261740-5443::Chr8A:1922631-1922932	6.3993e-09	5.38404e-09	5.66155e-06	1.23819e-11	1.31296e-11
89	AX-171261740-5586::Chr8B:205240-205541	5.4816e-09	5.38404e-09	5.57562e-06	1.08467e-11	1.31296e-11
90	AX-171261973-1708::Chr2D:39904764-39905065	3.36154e-09	5.38404e-09	5.57562e-06	8.91548e-12	7.79568e-12
91	AX-171262364-4100::Chr5D:81138681-81138982	2.28127e-09	5.38404e-09	5.0292e-06	6.81735e-12	4.63179e-12
92	AX-171262709-1942::Chr3A:48034747-48035048	1.90473e-09	5.38404e-09	4.64552e-06	4.74293e-12	4.63179e-12
93	AX-171263632-3433::Chr4D:68312547-68312848	1.43244e-09	5.38404e-09	4.64552e-06	4.69896e-12	4.63179e-12
94	AX-171263823-871::Chr1D:74020247-74020548	1.29462e-09	4.25906e-09	4.64552e-06	3.74852e-12	4.63179e-12
95	AX-171264516-3457::Chr4D:75628102-75628403	1.29462e-09	2.52882e-09	4.37464e-06	2.92656e-12	4.63179e-12
96	AX-171265298-2597::Chr3D:38301432-38301733	1.23237e-09	1.50368e-09	2.60912e-06	1.77328e-12	2.75013e-12
97	AX-171265386-3569::Chr5A:41038929-41039230	7.31758e-10	8.92808e-10	1.55226e-06	1.05366e-12	1.63289e-12
98	AX-171265386-3712::Chr5B:35179466-35179767	5.21222e-10	8.92808e-10	1.52175e-06	9.23017e-13	1.63289e-12
99	AX-171265862-5289::Chr7D:39564604-39564905	4.62564e-10	8.92808e-10	1.3536e-06	6.50928e-13	9.70178e-13
100	AX-171267405-1388::Chr2C:111276212-111276513	3.0386e-10	7.06259e-10	1.2936e-06	4.97741e-13	9.70178e-13
101	AX-171267405-1792::Chr2D:96395491-96395792	1.99607e-10	5.58688e-10	1.23626e-06	3.80605e-13	9.70178e-13
102	AX-171267430-2197::Chr3B:81849545-81849846	1.18872e-10	3.31721e-10	7.34027e-07	2.26025e-13	5.76043e-13
103	AX-171267430-2625::Chr3D:45169875-45170176	7.08206e-11	1.96959e-10	4.35828e-07	1.34227e-13	3.42026e-13
104	AX-171267692-3818::Chr5C:18875346-18875647	6.4875e-11	1.96959e-10	4.22775e-07	1.13827e-13	3.42026e-13
105	AX-171267996-5929::Chr8D:62369501-62369802	5.17967e-11	1.96959e-10	3.16432e-07	1.12771e-13	3.42026e-13
106	AX-171268105-1643::Chr2D:16823892-16824193	4.76907e-11	1.96959e-10	3.16432e-07	1.09686e-13	2.23791e-13
107	AX-171268232-794::Chr1D:31162814-31163115	3.76338e-11	1.96959e-10	2.17158e-07	6.78842e-14	2.23791e-13
108	AX-171268275-5386::Chr7D:81320477-81320778	3.65287e-11	1.55805e-10	2.13862e-07	4.5035e-14	2.23791e-13
109	AX-171268533-4584::Chr6D:10136055-10136356	3.0628e-11	1.55805e-10	2.13862e-07	4.22528e-14	2.23791e-13
110	AX-171269142-3324::Chr4D:18828765-18829066	2.54658e-11	9.59513e-11	2.13862e-07	4.10968e-14	1.32876e-13
111	AX-171269335-3422::Chr4D:62522353-62522654	2.28059e-11	9.59513e-11	2.13862e-07	3.99725e-14	7.88951e-14
112	AX-171269756-1611::Chr2D:105075479-105075780	2.26912e-11	5.69711e-11	1.63618e-07	3.53087e-14	7.88951e-14
113	AX-171270244-5280::Chr7D:35489550-35489851	2.23536e-11	4.50672e-11	1.63618e-07	2.79629e-14	7.88951e-14
114	AX-171270269-5464::Chr8A:24467435-24467736	1.33177e-11	3.30487e-11	9.89088e-08	1.66152e-14	4.6844e-14
115	AX-171270269-5742::Chr8C:24947433-24947734	7.93106e-12	2.42353e-11	5.97914e-08	9.87255e-15	2.78136e-14
116	AX-171270569-3055::Chr4B:75471756-75472057	5.78348e-12	1.49251e-11	5.97914e-08	9.60245e-15	2.78136e-14
117	AX-171270569-3274::Chr4C:79075825-79076126	4.21742e-12	9.19148e-12	5.97914e-08	9.33975e-15	2.78136e-14
118	AX-171271206-4025::Chr5D:4247870-4248171	3.90138e-12	5.99374e-12	3.57854e-08	5.54956e-15	1.65143e-14
119	AX-171271375-2531::Chr3D:18204031-18204332	3.19071e-12	3.75116e-12	3.52423e-08	4.66895e-15	1.65143e-14
120	AX-171271837-2602::Chr3D:40066217-40066518	2.40809e-12	3.75116e-12	3.36801e-08	3.6976e-15	1.65143e-14
121	AX-171273636-2670::Chr3D:7457331-7457632	2.19661e-12	3.75116e-12	3.31689e-08	3.08656e-15	1.65143e-14
122	AX-171275085-5030::Chr7B:75777285-75777586	1.64613e-12	2.31012e-12	3.31689e-08	2.97489e-15	1.65143e-14
123	AX-171275257-5292::Chr7D:39761911-39762212	1.61362e-12	1.82743e-12	2.53763e-08	2.46407e-15	9.80538e-15
124	AX-171275456-5689::Chr8C:10407984-10408285	1.60555e-12	1.82743e-12	1.55564e-08	2.02535e-15	9.80538e-15
125	AX-171275456-5947::Chr8D:9703586-9703887	1.59752e-12	1.82743e-12	9.53654e-09	1.66474e-15	9.80538e-15
126	AX-171276280-5446::Chr8A:19835592-19835893	9.74445e-13	1.44559e-12	7.83581e-09	1.11468e-15	9.80538e-15
127	AX-171276431-672::Chr1D:103665582-103665883	5.78584e-13	8.69666e-13	5.28915e-09	6.68728e-16	6.92051e-15
128	AX-171277506-2589::Chr3D:36849210-36849511	5.75689e-13	5.16364e-13	3.46421e-09	3.9713e-16	4.10905e-15
129	AX-171278478-5597::Chr8B:2895279-2895580	5.75689e-13	5.16364e-13	3.41163e-09	3.19142e-16	4.10905e-15
130	AX-171278478-5872::Chr8D:3764135-3764436	5.75689e-13	5.16364e-13	3.35985e-09	2.56469e-16	4.10905e-15
131	AX-171278504-1685::Chr2D:30731598-30731899	5.72809e-13	3.06591e-13	2.59976e-09	1.52341e-16	2.43975e-15
132	AX-171278520-2214::Chr3B:86361787-86362088	4.24808e-13	2.33191e-13	2.55706e-09	1.2175e-16	2.43975e-15
133	AX-171278520-2643::Chr3D:50576217-50576518	3.15047e-13	1.77363e-13	2.51506e-09	9.73021e-17	2.43975e-15
134	AX-171278530-2574::Chr3D:29645352-29645653	2.97026e-13	1.77363e-13	2.47688e-09	7.19951e-17	2.43975e-15
135	AX-171278760-4062::Chr5D:59386077-59386378	2.78701e-13	1.77363e-13	2.266e-09	5.54301e-17	2.43975e-15
136	AX-171279059-3351::Chr4D:26721876-26722177	2.4959e-13	1.77363e-13	2.23161e-09	4.45447e-17	2.43975e-15
137	AX-171281648-5932::Chr8D:63827897-63828198	2.41077e-13	1.77363e-13	2.19773e-09	3.36075e-17	2.43975e-15
138	AX-171283391-4332::Chr6B:31570231-31570532	2.23011e-13	1.77363e-13	2.16437e-09	2.73203e-17	2.27605e-15
139	AX-171283391-4481::Chr6C:32960004-32960305	2.07275e-13	1.77363e-13	2.13152e-09	2.22859e-17	2.27605e-15
140	AX-171283638-1556::Chr2C:67150463-67150764	2.07275e-13	1.77363e-13	2.13152e-09	1.63858e-17	2.27605e-15
141	AX-171284042-2982::Chr4B:54252966-54253267	1.42609e-13	1.77363e-13	1.51659e-09	1.08705e-17	1.3514e-15
142	AX-171284042-3412::Chr4D:57905904-57906205	9.81173e-14	1.77363e-13	1.07906e-09	7.21156e-18	8.02395e-16
143	AX-171284173-925::Chr1D:92112998-92113299	9.76264e-14	1.40303e-13	1.06268e-09	5.7529e-18	8.02395e-16
144	AX-171284173-987::Chr2A:110536725-110537026	9.71379e-14	1.10987e-13	1.04655e-09	4.58928e-18	8.02395e-16
145	AX-171284841-5177::Chr7C:67982580-67982881	9.71379e-14	1.10987e-13	7.83308e-10	3.31272e-18	8.02395e-16
146	AX-171284841-5387::Chr7D:82839505-82839806	9.71379e-14	1.10987e-13	5.86279e-10	2.39125e-18	8.02395e-16
147	AX-171284869-4070::Chr5D:63953474-63953775	8.94378e-14	1.05409e-13	4.64359e-10	1.8669e-18	4.76422e-16
148	AX-171285322-660::Chr1D:100898762-100899063	8.94378e-14	1.05409e-13	4.43775e-10	1.50028e-18	4.76422e-16
149	AX-171285955-3782::Chr5B:9426404-9426705	5.58957e-14	6.25866e-14	4.37039e-10	9.95298e-19	4.76422e-16
150	AX-171285955-3957::Chr5D:17573394-17573695	3.4933e-14	3.71608e-14	4.30406e-10	6.60289e-19	4.76422e-16
151	AX-171287224-1157::Chr2A:95269425-95269726	2.08634e-14	2.20642e-14	2.58147e-10	3.92046e-19	2.82876e-16
152	AX-171287455-3359::Chr4D:28590393-28590694	1.65923e-14	1.56441e-14	1.53297e-10	2.50617e-19	2.09019e-16
153	AX-171287634-5805::Chr8D:10495293-10495594	1.65093e-14	9.30224e-15	1.24398e-10	1.63391e-19	1.24105e-16
154	AX-171287687-621::Chr1C:87620882-87621183	1.57154e-14	9.30224e-15	1.20672e-10	1.31304e-19	1.24105e-16
155	AX-171287687-893::Chr1D:86373932-86374233	1.49596e-14	9.30224e-15	1.17058e-10	1.05519e-19	1.24105e-16
156	AX-171287985-3761::Chr5B:768919-769220	9.03677e-15	5.52321e-15	1.13552e-10	6.40634e-20	1.15778e-16
157	AX-171288013-664::Chr1D:101972665-101972966	9.03677e-15	4.36915e-15	7.93081e-11	4.17664e-20	1.15778e-16
158	AX-171288077-2539::Chr3D:20618273-20618574	9.03677e-15	4.36915e-15	7.81043e-11	3.30772e-20	1.15778e-16
159	AX-171288341-2111::Chr3B:42062734-42063035	6.34512e-15	3.45623e-15	7.81043e-11	2.87383e-20	1.15778e-16
160	AX-171288341-2541::Chr3D:21002372-21002673	4.45518e-15	2.73406e-15	7.81043e-11	2.49685e-20	1.15778e-16
161	AX-171288570-1413::Chr2C:123467362-123467663	3.9538e-15	2.73406e-15	7.57649e-11	2.00652e-20	1.15778e-16
162	AX-171288658-2355::Chr3C:37371182-37371483	3.9538e-15	2.73406e-15	4.83453e-11	1.37018e-20	1.15778e-16
163	AX-171288658-2568::Chr3D:27707806-27708107	3.9538e-15	2.73406e-15	3.08489e-11	9.35642e-21	1.15778e-16
164	AX-171289129-3974::Chr5D:21904061-21904362	3.09617e-15	2.16279e-15	3.08489e-11	7.63229e-21	1.15778e-16
165	AX-171289322-4557::Chr6C:79101365-79101666	2.85074e-15	2.16279e-15	3.03807e-11	6.32176e-21	1.15778e-16
166	AX-171289322-4703::Chr6D:68178044-68178345	2.62476e-15	2.16279e-15	2.99195e-11	5.23625e-21	1.15778e-16
167	AX-171289490-5314::Chr7D:45960975-45961276	2.62476e-15	2.16279e-15	2.48975e-11	4.03146e-21	6.87891e-17
168	AX-171289573-4002::Chr5D:27530150-27530451	2.61163e-15	2.16279e-15	1.68058e-11	3.12546e-21	6.87891e-17
169	AX-171290326-5849::Chr8D:23186931-23187232	1.74058e-15	1.35357e-15	1.58258e-11	2.45751e-21	6.87891e-17
170	AX-171291015-1398::Chr2C:115631296-115631597	1.68121e-15	1.35357e-15	1.55856e-11	1.81834e-21	6.87891e-17
171	AX-171291063-4636::Chr6D:36401137-36401438	1.3806e-15	1.35357e-15	1.40582e-11	1.28964e-21	4.08435e-17
172	AX-171291587-2652::Chr3D:54402293-54402594	1.07703e-15	1.07075e-15	1.3435e-11	9.99815e-22	4.08435e-17
173	AX-171292005-5876::Chr8D:38284380-38284681	8.56539e-16	9.67963e-16	1.3435e-11	8.83163e-22	4.08435e-17
174	AX-171292017-2025::Chr3A:8682974-8683275	5.99623e-16	9.67963e-16	1.3228e-11	6.70776e-22	4.08435e-17
175	AX-171292017-2525::Chr3D:15641921-15642222	4.19767e-16	9.67963e-16	1.30241e-11	5.09465e-22	4.08435e-17
176	AX-171293176-4561::Chr6C:8011573-8011874	3.4053e-16	5.96111e-16	1.28264e-11	3.7696e-22	2.42509e-17
177	AX-171293176-4713::Chr6D:7383882-7384183	2.76249e-16	3.67109e-16	1.26317e-11	2.78917e-22	1.43989e-17
178	AX-171293210-3454::Chr4D:73052094-73052395	1.68919e-16	2.19247e-16	1.22534e-11	1.70443e-22	1.43989e-17
179	AX-171293409-3762::Chr5B:82213650-82213951	1.29343e-16	2.19247e-16	1.22534e-11	1.46882e-22	1.43989e-17
180	AX-171293888-5592::Chr8B:27376310-27376611	7.69702e-17	1.30178e-16	1.17102e-11	8.72473e-23	1.43989e-17
181	AX-171293990-795::Chr1D:31249303-31249604	4.67351e-17	8.01687e-17	1.11911e-11	6.55364e-23	8.54937e-18
182	AX-171294032-3800::Chr5C:12851128-12851429	4.44877e-17	4.93712e-17	7.09907e-12	4.70256e-23	5.07619e-18
183	AX-171294032-3980::Chr5D:22785088-22785389	4.23483e-17	3.04048e-17	4.50327e-12	3.37432e-23	3.01399e-18
184	AX-171294378-2537::Chr3D:19885101-19885402	4.15119e-17	3.04048e-17	4.43278e-12	2.52352e-23	3.01399e-18
185	AX-171294791-3401::Chr4D:53237692-53237993	3.7518e-17	3.04048e-17	4.43278e-12	2.13998e-23	1.78956e-18
186	AX-171294835-752::Chr1D:18434337-18434638	2.26858e-17	2.22965e-17	4.30001e-12	1.29667e-23	1.06255e-18
187	AX-171295519-898::Chr1D:87194211-87194512	1.46398e-17	1.37311e-17	4.30001e-12	9.91516e-24	1.06255e-18
188	AX-171295532-828::Chr1D:51926464-51926765	1.27058e-17	1.0862e-17	4.17122e-12	7.63382e-24	1.06255e-18
189	AX-171295582-2931::Chr4B:31480873-31481174	1.159e-17	1.0862e-17	4.17122e-12	6.9166e-24	1.06255e-18
190	AX-171295582-3378::Chr4D:38238131-38238432	1.05722e-17	1.0862e-17	4.17122e-12	6.26677e-24	1.06255e-18
191	AX-171296673-4663::Chr6D:48358452-48358753	1.05722e-17	1.0862e-17	4.1079e-12	4.66666e-24	1.06255e-18
192	AX-171296946-1631::Chr2D:14488667-14488968	8.64635e-18	1.0862e-17	4.04555e-12	3.98919e-24	6.30888e-19
193	AX-171297356-1660::Chr2D:22964875-22965176	5.80648e-18	1.0862e-17	3.86623e-12	2.93307e-24	6.30888e-19
194	AX-171297409-2528::Chr3D:17262642-17262943	5.80648e-18	6.68927e-18	3.06222e-12	2.2129e-24	3.7459e-19
195	AX-171297588-4065::Chr5D:60968213-60968514	5.66376e-18	6.68927e-18	3.01574e-12	1.59736e-24	2.23761e-19
196	AX-171298012-3399::Chr4D:4847992-4848293	5.60734e-18	4.11953e-18	1.81306e-12	1.47254e-24	2.23761e-19
197	AX-171298554-2267::Chr3C:13293162-13293463	3.3294e-18	2.44597e-18	1.0765e-12	8.74321e-25	1.32858e-19
198	AX-171298554-2671::Chr3D:8112909-8113210	1.97683e-18	1.45229e-18	6.39174e-13	5.19128e-25	7.88845e-20
199	AX-171298781-390::Chr1B:5403803-5404104	1.97683e-18	8.623e-19	4.07854e-13	3.0836e-25	4.68692e-20
200	AX-171298781-835::Chr1D:6192124-6192425	1.97683e-18	5.1199e-19	2.6025e-13	1.83164e-25	2.78473e-20
201	AX-171299524-765::Chr1D:21928217-21928518	1.97683e-18	5.1199e-19	2.52455e-13	1.2323e-25	2.78473e-20
202	AX-171300099-464::Chr1B:9084280-9084581	1.97683e-18	4.62843e-19	2.343e-13	8.33117e-26	1.65343e-20
203	AX-171300099-465::Chr1B:9129390-9129691	1.97683e-18	4.18413e-19	2.17451e-13	5.63241e-26	9.81724e-21
204	AX-171300099-921::Chr1D:9116159-9116460	1.97683e-18	3.78248e-19	2.01814e-13	3.80787e-26	5.82899e-21
205	AX-171300113-4932::Chr7B:20400415-20400716	1.38389e-18	2.3294e-19	2.01814e-13	3.80787e-26	5.82899e-21
206	AX-171300113-4933::Chr7B:20420452-20420753	9.68793e-19	1.43454e-19	2.01814e-13	3.80787e-26	5.82899e-21
207	AX-171300113-5077::Chr7C:18494902-18495203	6.78206e-19	8.83449e-20	2.01814e-13	3.80787e-26	5.82899e-21
208	AX-171300125-2601::Chr3D:39470255-39470556	4.02733e-19	5.24548e-20	1.43592e-13	2.27857e-26	3.46096e-21
209	AX-171300705-940::Chr1D:95822523-95822824	2.63341e-19	3.1145e-20	1.39291e-13	1.45658e-26	2.05495e-21
210	AX-171301140-3106::Chr4C:15972957-15973258	1.6458e-19	1.91804e-20	1.31169e-13	1.02147e-26	1.22094e-21
211	AX-171301140-3320::Chr4D:17055050-17055351	1.02857e-19	1.18121e-20	1.2352e-13	7.1634e-27	7.25422e-22
212	AX-171301194-1789::Chr2D:94266577-94266878	9.93484e-20	1.18121e-20	1.00235e-13	5.33435e-27	7.25422e-22
213	AX-171301417-5926::Chr8D:6024957-6025258	9.73863e-20	1.18121e-20	6.35836e-14	4.41839e-27	7.25422e-22
214	AX-171301515-4352::Chr6B:43719019-43719320	8.34205e-20	1.18121e-20	6.35836e-14	4.1825e-27	4.30719e-22
215	AX-171301584-159::Chr1A:71450011-71450312	6.34126e-20	1.18121e-20	6.35836e-14	4.1825e-27	4.30719e-22
216	AX-171301625-3486::Chr4D:8468799-8469100	4.85558e-20	1.18121e-20	6.35836e-14	3.66392e-27	4.30719e-22
217	AX-171301730-1517::Chr2C:44614149-44614450	4.36831e-20	7.27436e-21	6.35836e-14	3.40734e-27	2.5574e-22
218	AX-171301730-1721::Chr2D:45309590-45309891	3.92995e-20	4.47985e-21	6.35836e-14	3.16873e-27	1.51845e-22
219	AX-171302445-3308::Chr4D:14815148-14815449	3.61842e-20	4.47985e-21	6.16792e-14	2.42301e-27	9.04007e-23
220	AX-171304423-3442::Chr4D:70199914-70200215	2.47571e-20	4.47985e-21	6.0743e-14	1.96171e-27	9.04007e-23
221	AX-171304494-1559::Chr2C:69653401-69653702	1.93134e-20	4.47985e-21	6.0743e-14	1.84052e-27	5.36754e-23
222	AX-171304494-1748::Chr2D:62325865-62326166	1.50667e-20	4.47985e-21	6.0743e-14	1.72682e-27	3.18698e-23
223	AX-171304499-683::Chr1D:106115272-106115573	1.45528e-20	4.47985e-21	6.0743e-14	1.3295e-27	3.18698e-23
224	AX-171305242-866::Chr1D:73093043-73093344	1.44078e-20	3.5438e-21	5.89236e-14	9.96484e-28	3.18698e-23
225	AX-171305288-5326::Chr7D:5671726-5672027	8.55473e-21	2.10413e-21	5.63117e-14	5.93406e-28	1.89227e-23
226	AX-171305424-5045::Chr7B:80181102-80181403	5.9193e-21	2.10413e-21	5.5457e-14	5.24171e-28	1.89227e-23
227	AX-171305424-5356::Chr7D:67813880-67814181	4.09575e-21	2.10413e-21	5.46152e-14	4.63014e-28	1.89227e-23
228	AX-171305983-930::Chr1D:93082462-93082763	3.29608e-21	2.10413e-21	4.22598e-14	3.11509e-28	1.12353e-23
229	AX-171305983-931::Chr1D:93314570-93314871	2.66317e-21	2.10413e-21	3.26996e-14	2.09578e-28	6.67546e-24
230	AX-171306715-1510::Chr2C:42570213-42570514	1.85885e-21	1.66448e-21	3.17202e-14	2.01996e-28	3.96356e-24
231	AX-171306715-1692::Chr2D:33691514-33691815	1.29745e-21	1.31669e-21	3.07701e-14	1.94688e-28	2.35336e-24
232	AX-171307304-1735::Chr2D:53739087-53739388	8.44577e-22	1.25051e-21	2.98485e-14	1.44052e-28	1.39731e-24
233	AX-171307322-2639::Chr3D:49628667-49628968	8.07863e-22	1.25051e-21	2.98485e-14	1.17507e-28	1.39731e-24
234	AX-171307405-2957::Chr4B:43477049-43477350	8.0347e-22	1.25051e-21	1.819e-14	7.09841e-29	1.39731e-24
235	AX-171307405-3404::Chr4D:55753276-55753577	7.99429e-22	1.25051e-21	1.10677e-14	4.28529e-29	1.39731e-24
236	AX-171307616-5808::Chr8D:10865592-10865893	7.91465e-22	1.25051e-21	9.45276e-15	3.54946e-29	1.39731e-24
237	AX-171308297-5369::Chr7D:76597457-76597758	4.69939e-22	7.42491e-22	6.14866e-15	2.11099e-29	8.29652e-25
238	AX-171309075-185::Chr1A:84500548-84500849	4.517e-22	4.40854e-22	5.1166e-15	1.2534e-29	4.92606e-25
239	AX-171309236-3861::Chr5C:4404619-4404920	4.15894e-22	4.40854e-22	5.1166e-15	1.05451e-29	4.92606e-25
240	AX-171309236-3952::Chr5D:15841362-15841663	3.82926e-22	4.40854e-22	5.1166e-15	8.87179e-30	4.92606e-25
241	AX-171309683-5784::Chr8C:52645787-52646088	3.38305e-22	4.40854e-22	4.8829e-15	7.06417e-30	4.92606e-25
242	AX-171309683-5911::Chr8D:53404179-53404480	2.92327e-22	3.48739e-22	4.73665e-15	5.47662e-30	4.92606e-25
243	AX-171312942-5236::Chr7D:13541844-13542145	2.92327e-22	2.14768e-22	3.9416e-15	4.27573e-30	2.92485e-25
244	AX-171313173-2644::Chr3D:5160795-5161096	2.89414e-22	1.32263e-22	2.34295e-15	2.59077e-30	1.7554e-25
245	AX-171313689-1549::Chr2C:62994891-62995192	2.63998e-22	1.32263e-22	2.27278e-15	2.05178e-30	1.7554e-25
246	AX-171313689-1550::Chr2C:63004354-63004655	2.40814e-22	1.32263e-22	2.23828e-15	1.63677e-30	1.7554e-25
247	AX-171313689-1741::Chr2D:55828587-55828888	2.19666e-22	1.32263e-22	2.20431e-15	1.29625e-30	1.7554e-25
248	AX-171314129-3114::Chr4C:1743814-1744115	1.77485e-22	1.32263e-22	2.17085e-15	9.30123e-31	1.04227e-25
249	AX-171314129-3375::Chr4D:3560737-3561038	1.43404e-22	1.32263e-22	2.1379e-15	6.6741e-31	6.18845e-26
250	AX-171314187-5903::Chr8D:50447559-50447860	1.43404e-22	1.32263e-22	1.53586e-15	5.7052e-31	6.18845e-26
251	AX-171314522-2526::Chr3D:16017680-16017981	8.57474e-23	7.8531e-23	1.51255e-15	3.89586e-31	3.67439e-26
252	AX-171315767-5830::Chr8D:16293290-16293591	7.96968e-23	6.21222e-23	1.48959e-15	2.97903e-31	3.67439e-26
253	AX-171315983-891::Chr1D:85318773-85319074	6.91224e-23	4.9142e-23	1.46698e-15	2.04475e-31	3.67439e-26
254	AX-171316076-5166::Chr7C:63311828-63312129	6.77573e-23	2.9178e-23	1.46698e-15	1.83688e-31	2.18167e-26
255	AX-171316076-5325::Chr7D:54578793-54579094	4.66182e-23	2.9178e-23	1.46698e-15	1.83688e-31	2.18167e-26
256	AX-171316271-2268::Chr3C:13617607-13617908	4.66182e-23	2.9178e-23	1.44472e-15	1.33398e-31	2.18167e-26
257	AX-171316271-2673::Chr3D:8148177-8148478	4.66182e-23	2.9178e-23	1.42279e-15	9.68757e-32	2.18167e-26
258	AX-171316695-2582::Chr3D:34317511-34317812	2.92331e-23	1.73245e-23	1.3386e-15	5.75309e-32	1.29537e-26
259	AX-171316783-5176::Chr7C:67025244-67025545	1.94349e-23	1.73245e-23	1.3386e-15	5.44594e-32	1.29537e-26
260	AX-171316995-3236::Chr4C:67226400-67226701	1.36461e-23	1.02864e-23	7.94891e-16	3.23353e-32	7.69125e-27
261	AX-171316995-3440::Chr4D:70059036-70059337	9.5815e-24	6.10755e-24	4.72025e-16	1.91991e-32	4.56668e-27
262	AX-171317899-2433::Chr3C:72782688-72782989	6.57382e-24	6.10755e-24	4.6486e-16	1.66806e-32	4.56668e-27
263	AX-171317899-2600::Chr3D:39316739-39317040	4.41467e-24	6.10755e-24	4.57804e-16	1.44926e-32	4.56668e-27
264	AX-171318152-5115::Chr7C:39714758-39715059	4.39258e-24	3.76128e-24	3.06582e-16	9.48841e-33	4.56668e-27
265	AX-171318152-5275::Chr7D:32956667-32956968	4.39258e-24	2.31635e-24	2.03746e-16	6.18602e-33	4.56668e-27
266	AX-171318266-2980::Chr4B:50622705-50623006	4.28462e-24	1.83236e-24	2.03746e-16	5.00831e-33	4.56668e-27
267	AX-171318377-2605::Chr3D:40204233-40204534	3.81967e-24	1.83236e-24	1.97644e-16	3.51223e-33	4.56668e-27
268	AX-171319106-4642::Chr6D:38652320-38652621	2.40784e-24	1.44949e-24	1.97644e-16	3.00235e-33	4.56668e-27
269	AX-171319132-2667::Chr3D:7018704-7019005	2.37202e-24	1.14662e-24	1.2945e-16	2.69714e-33	4.56668e-27
270	AX-171320282-4045::Chr5D:50932761-50933062	2.04071e-24	1.14662e-24	1.25573e-16	1.85126e-33	4.56668e-27
271	AX-171321109-2441::Chr3C:75484717-75485018	1.46984e-24	1.03656e-24	1.25573e-16	1.75243e-33	4.56668e-27
272	AX-171321109-2607::Chr3D:41372033-41372334	1.05796e-24	9.37053e-25	1.25573e-16	1.65887e-33	4.56668e-27
273	AX-171321858-5936::Chr8D:66417057-66417358	6.66541e-25	5.86451e-25	1.25573e-16	1.18051e-33	2.71146e-27
274	AX-171321874-3329::Chr4D:2054357-2054658	6.66541e-25	4.46049e-25	1.11697e-16	1.00913e-33	2.71146e-27
275	AX-171322048-3227::Chr4C:6397742-6398043	5.06676e-25	4.46049e-25	8.95379e-17	1.00913e-33	2.71146e-27
276	AX-171322048-3426::Chr4D:6544009-6544310	3.85153e-25	4.46049e-25	7.17749e-17	1.00913e-33	2.71146e-27
277	AX-171322269-1780::Chr2D:89051963-89052264	2.8274e-25	4.46049e-25	7.17749e-17	9.38461e-34	1.61101e-27
278	AX-171322422-2725::Chr4A:24402080-24402381	2.8274e-25	4.46049e-25	7.06854e-17	7.43219e-34	1.61101e-27
279	AX-171322422-3346::Chr4D:25146938-25147239	2.8274e-25	4.46049e-25	6.96125e-17	5.88597e-34	1.61101e-27
280	AX-171322439-1490::Chr2C:37643350-37643651	2.60327e-25	4.46049e-25	6.96125e-17	4.76538e-34	1.61101e-27
281	AX-171322439-1678::Chr2D:28624550-28624851	2.39691e-25	4.46049e-25	6.96125e-17	3.85814e-34	1.61101e-27
282	AX-171323918-3302::Chr4D:1406513-1406814	1.67301e-25	3.52849e-25	6.96125e-17	2.69078e-34	1.61101e-27
283	AX-171324753-3445::Chr4D:70756361-70756662	1.51903e-25	2.79122e-25	6.85559e-17	2.33782e-34	1.61101e-27
284	AX-171325316-5420::Chr8A:14140696-14140997	1.07634e-25	2.79122e-25	6.75153e-17	1.70822e-34	1.61101e-27
285	AX-171325620-178::Chr1A:80705703-80706004	6.55e-26	1.65729e-25	6.75153e-17	1.48414e-34	9.57182e-28
286	AX-171327044-816::Chr1D:42587302-42587603	6.20504e-26	1.65729e-25	6.54624e-17	1.09122e-34	9.57182e-28
287	AX-171328189-5840::Chr8D:18180258-18180559	6.02283e-26	1.65729e-25	6.44687e-17	8.70505e-35	5.68708e-28
288	AX-171330705-4909::Chr7B:13237446-13237747	6.02283e-26	1.00727e-25	5.73449e-17	8.4669e-35	3.37897e-28
289	AX-171330705-5225::Chr7C:9359025-9359326	6.02283e-26	6.12205e-26	5.10083e-17	8.23526e-35	2.00761e-28
290	AX-171331841-5897::Chr8D:45820730-45821031	6.02283e-26	6.12205e-26	3.94689e-17	6.52196e-35	2.00761e-28
291	AX-171332712-826::Chr1D:51568645-51568946	5.02872e-26	6.12205e-26	3.71674e-17	5.57515e-35	2.00761e-28
292	AX-171333433-909::Chr1D:89430929-89431230	4.97862e-26	6.12205e-26	2.29794e-17	4.51374e-35	1.19202e-28
293	AX-171333747-3105::Chr4C:15157695-15157996	4.53157e-26	6.12205e-26	2.18434e-17	3.88055e-35	1.19202e-28
294	AX-171333747-3315::Chr4D:16078776-16079077	4.12466e-26	6.12205e-26	2.07636e-17	3.33619e-35	1.19202e-28
295	AX-171334090-2377::Chr3C:44124105-44124406	3.94535e-26	6.12205e-26	1.72784e-17	2.48435e-35	1.19202e-28
296	AX-171334090-2581::Chr3D:33726605-33726906	3.77385e-26	6.12205e-26	1.43782e-17	1.85002e-35	1.19202e-28
297	AX-171334272-2535::Chr3D:19230384-19230685	3.17766e-26	6.12205e-26	1.43782e-17	1.73572e-35	7.07762e-29
298	AX-171334287-799::Chr1D:32627289-32627590	1.88696e-26	3.63497e-26	1.33442e-17	1.04974e-35	4.20234e-29
299	AX-171334467-1693::Chr2D:33696883-33697184	1.88696e-26	3.63497e-26	1.25661e-17	8.76262e-36	4.20234e-29
300	AX-171350439-1295::Chr2B:42377777-42378078	1.6746e-26	3.63497e-26	1.21897e-17	6.28762e-36	4.20234e-29
301	AX-171350439-1706::Chr2D:37789479-37789780	1.48615e-26	3.63497e-26	1.18246e-17	4.51168e-36	4.20234e-29
302	AX-171350571-1704::Chr2D:36532705-36533006	1.47871e-26	3.63497e-26	9.59553e-18	3.8567e-36	4.20234e-29
303	AX-171351484-542::Chr1C:39864213-39864514	1.39413e-26	3.63497e-26	9.44988e-18	3.01102e-36	4.20234e-29
304	AX-171351484-815::Chr1D:41723075-41723376	1.31438e-26	3.63497e-26	9.30644e-18	2.35078e-36	4.20234e-29
305	AX-171351528-1600::Chr2D:102707968-102708269	8.77028e-27	2.23856e-26	9.0191e-18	2.07421e-36	2.50185e-29
306	AX-171351544-4573::Chr6C:885653-885954	6.81604e-27	2.23856e-26	9.0191e-18	1.99917e-36	2.50185e-29
307	AX-171351544-4658::Chr6D:452677-452978	5.29725e-27	2.23856e-26	9.0191e-18	1.92684e-36	2.50185e-29
308	AX-171352627-3872::Chr5C:49112409-49112710	4.33231e-27	1.3786e-26	9.0191e-18	1.89141e-36	2.50185e-29
309	AX-171352627-4051::Chr5D:53878858-53879159	3.54315e-27	8.48997e-27	9.0191e-18	1.85663e-36	2.50185e-29
310	AX-171353578-1507::Chr2C:41754304-41754605	2.8178e-27	8.48997e-27	8.8822e-18	1.45984e-36	2.50185e-29
311	AX-171354325-2983::Chr4B:54254337-54254638	2.03473e-27	8.48997e-27	6.31973e-18	9.36713e-37	1.48547e-29
312	AX-171354325-3411::Chr4D:57904520-57904821	1.46928e-27	8.48997e-27	4.49653e-18	6.01045e-37	8.81999e-30
313	AX-171354572-3990::Chr5D:24339567-24339868	1.46928e-27	8.48997e-27	4.36185e-18	5.09694e-37	8.81999e-30
314	AX-171354812-3398::Chr4D:4801764-4802065	1.46928e-27	8.48997e-27	3.7754e-18	3.9793e-37	8.81999e-30
315	AX-171354898-2519::Chr3D:14882127-14882428	1.46928e-27	8.48997e-27	3.66232e-18	2.82228e-37	8.81999e-30
316	AX-171355015-3309::Chr4D:14843810-14844111	1.46193e-27	8.48997e-27	3.12794e-18	2.00168e-37	5.23687e-30
317	AX-171355245-4724::Chr6D:91055729-91056030	1.2645e-27	6.4574e-27	2.60292e-18	1.63282e-37	3.69611e-30
318	AX-171355344-4633::Chr6D:32073931-32074232	1.22736e-27	6.4574e-27	2.56341e-18	1.37373e-37	3.69611e-30
319	AX-171355373-4646::Chr6D:39616222-39616523	1.22736e-27	6.4574e-27	1.67895e-18	9.03273e-38	3.69611e-30
320	AX-171356152-1599::Chr2D:102707933-102708234	1.1042e-27	6.4574e-27	1.65346e-18	8.04607e-38	3.69611e-30
321	AX-171356527-5267::Chr7D:26806958-26807259	1.07706e-27	6.4574e-27	1.62836e-18	5.73967e-38	2.19457e-30
322	AX-171357625-1802::Chr2D:98905238-98905539	1.05058e-27	3.88476e-27	1.1175e-18	4.64694e-38	2.19457e-30
323	AX-171358091-301::Chr1B:12885462-12885763	7.95736e-28	3.88476e-27	1.10054e-18	3.70701e-38	2.19457e-30
324	AX-171358091-53::Chr1A:14600215-14600516	5.98428e-28	3.88476e-27	1.08383e-18	2.95721e-38	2.19457e-30
325	AX-171358091-736::Chr1D:12741285-12741586	4.53263e-28	3.88476e-27	1.06738e-18	2.35906e-38	2.19457e-30
326	AX-171358856-4609::Chr6D:22691815-22692116	2.71417e-28	2.30658e-27	6.4726e-19	1.40069e-38	1.30302e-30
327	AX-171359099-5912::Chr8D:53622171-53622472	2.71417e-28	1.69146e-27	5.31829e-19	9.7161e-39	1.30302e-30
328	AX-171359105-5794::Chr8C:7257688-7257989	2.3979e-28	1.69146e-27	5.31829e-19	7.80805e-39	1.30302e-30
329	AX-171359105-5941::Chr8D:7189713-7190014	2.11848e-28	1.69146e-27	5.31829e-19	6.2747e-39	1.30302e-30
330	AX-171359344-916::Chr1D:90226922-90227223	2.11848e-28	1.00577e-27	5.159e-19	5.40732e-39	1.30302e-30
331	AX-171359396-2506::Chr3D:12436069-12436370	1.47007e-28	6.19395e-28	5.08069e-19	4.13478e-39	7.7367e-31
332	AX-171359764-2194::Chr3B:81034039-81034340	9.87231e-29	6.19395e-28	5.08069e-19	3.94931e-39	4.59367e-31
333	AX-171359764-2619::Chr3D:44193916-44194217	6.62978e-29	6.19395e-28	5.08069e-19	3.77216e-39	2.72749e-31
334	AX-171360232-359::Chr1B:37441596-37441897	6.56373e-29	4.89974e-28	4.92851e-19	2.61661e-39	2.72749e-31
335	AX-171360232-800::Chr1D:32749581-32749882	6.49834e-29	3.87596e-28	4.7809e-19	1.81505e-39	2.72749e-31
336	AX-171361047-4378::Chr6B:55076966-55077267	5.22958e-29	3.87596e-28	4.70833e-19	1.51511e-39	2.72749e-31
337	AX-171361819-5907::Chr8D:51468476-51468777	3.10924e-29	2.33177e-28	4.49963e-19	9.18042e-40	1.61945e-31
338	AX-171362088-5202::Chr7C:76569748-76570049	2.13954e-29	1.436e-28	4.49963e-19	8.61326e-40	9.61547e-32
339	AX-171363001-1457::Chr2C:24339826-24340127	1.8407e-29	1.436e-28	4.36485e-19	7.24651e-40	9.61547e-32
340	AX-171363333-3350::Chr4D:26713915-26714216	1.73541e-29	1.436e-28	4.36485e-19	5.78078e-40	9.61547e-32
341	AX-171363600-3972::Chr5D:21408952-21409253	1.55415e-29	8.57614e-29	3.07657e-19	3.43629e-40	5.70918e-32
342	AX-171363616-2678::Chr3D:9669232-9669533	1.55415e-29	5.09209e-29	2.73661e-19	2.68279e-40	3.38983e-32
343	AX-171365338-4516::Chr6C:51178445-51178746	1.45134e-29	5.09209e-29	1.63787e-19	2.14015e-40	3.38983e-32
344	AX-171366026-4064::Chr5D:60957876-60958177	1.03155e-29	3.13591e-29	1.61301e-19	1.74578e-40	2.02491e-32
345	AX-171366486-670::Chr1D:10275802-10276103	1.02128e-29	3.13591e-29	1.0802e-19	1.27562e-40	2.02491e-32
346	AX-171367183-2290::Chr3C:22032680-22032981	8.67305e-30	3.13591e-29	1.06381e-19	1.07321e-40	2.02491e-32
347	AX-171367183-2518::Chr3D:14676788-14677089	7.36547e-30	3.13591e-29	1.04766e-19	8.95856e-41	2.02491e-32
348	AX-171367771-4217::Chr6A:63263145-63263446	4.38163e-30	2.48068e-29	6.2703e-20	5.31939e-41	1.20229e-32
349	AX-171367882-5620::Chr8B:40564636-40564937	2.61689e-30	1.49237e-29	4.34053e-20	3.15853e-41	7.13861e-33
350	AX-171367921-1480::Chr2C:31431888-31432189	2.52763e-30	8.91281e-30	3.65888e-20	2.39895e-41	7.13861e-33
351	AX-171368684-2561::Chr3D:25824163-25824464	2.51498e-30	8.91281e-30	2.65466e-20	1.65523e-41	7.13861e-33
352	AX-171368988-3338::Chr4D:23031620-23031921	2.11767e-30	8.91281e-30	2.61436e-20	1.3817e-41	7.13861e-33
353	AX-171369261-5389::Chr7D:8383009-8383310	1.59258e-30	8.91281e-30	2.53606e-20	1.20046e-41	7.13861e-33
354	AX-171369890-339::Chr1B:31541767-31542068	1.06407e-30	5.2997e-30	2.49756e-20	9.43902e-42	7.13861e-33
355	AX-171370052-5222::Chr7C:9026410-9026711	8.05953e-31	4.19234e-30	2.49756e-20	9.43902e-42	7.13861e-33
356	AX-171370052-5233::Chr7D:12131740-12132041	6.10448e-31	3.31637e-30	2.49756e-20	9.43902e-42	7.13861e-33
357	AX-171370296-824::Chr1D:46775346-46775647	5.59436e-31	3.31637e-30	2.42276e-20	7.58538e-42	7.13861e-33

## Sheet: Table S6
Table S6. List of 141 clones in five Saccharum species, including 110 clones with mislabled species membership and 31 clones with hybrid parentage detected by assignment test.
						Coefficient of Assignment
Sample name	Clone name	Location*	Country of origin	Country	S. barberi	S. robustum	S. officinarum	S. sinense	S. spontaneum	Recorded species membership in passport data	Identified speices membership	Assessment
SAC0145	Sunnabile	WD1-SC-10-30	India	India Tamil Nadu	0.002	0.003	0.991	0.002	0.002	S. barberi	S. officinarum	Mislabeled
SAC0172	Khagzi	WD1-SC-15-09	India	India Tamil Nadu	0.001	0.001	0	0.997	0.001	S. barberi	S. sinense	Mislabeled
SAC0186	Khagzi	WD1-SC-18-27	India	India Tamil Nadu	0.001	0.001	0.001	0.997	0.001	S. barberi	S. sinense	Mislabeled
SAC0277	Chin	lath house	Unknown	Unknown	0.122	0.031	0.006	0.154	0.686	S. barberi	S. spontaneum_S. barberi_S. sinense	Mislabeled
SAC0410	REHA SPORT	WD1-SC-09-17	India	India Tamil Nadu	0.003	0.282	0.412	0.001	0.301	S. barberi	S. officinarum_S. spontaneum_S. robustum	Mislabeled
SAC0425	MESANGEN	WD1-SC-10-17S	Guyana	Guyana	0.042	0.408	0.151	0.011	0.388	S. barberi	S. robustum_S. officinarum_S. spontaneum	Mislabeled
SAC0580	HEMJA	WD1-SC-18-30	US	United States Hawaii	0.008	0.003	0.986	0.001	0.002	S. barberi	S. officinarum	Mislabeled
SAC0581	DARK PINDARIA	WD1-SC-18-31	India	India Tamil Nadu	0.001	0.001	0	0.998	0.001	S. barberi	S. sinense	Mislabeled
SAC0670	Kinar	LH 2 (T1)	India	India Uttar Pradesh	0.001	0.001	0	0.998	0.001	S. barberi	S. sinense	Mislabeled
SAC0717	Baroukha 239	LH 2 (T1)	Unknown	Unknown	0.001	0.001	0	0.997	0.001	S. barberi	S. sinense	Mislabeled
SAC0719	Nargori	LH 2 (T1)	Unknown	Unknown	0.121	0.046	0.002	0.156	0.676	S. barberi	S. spontaneum_S. barberi_S. officinarum	Mislabeled
SAC0730	Newra	LH 3 (T1)	Unknown	Unknown	0.001	0.002	0.995	0.001	0.001	S. barberi	S. officinarum	Mislabeled
SAC0126	Ng 77-136	WD1-SC-07-20	Guadeloupe	Guadeloupe	0.001	0.001	0	0.997	0.001	S. robustum	S. sinense	Mislabeled
SAC0128	Ng 77-238	WD1-SC-08-07	Papua New Guinea	Papua New Guinea	0.002	0.001	0.993	0.001	0.002	S. robustum	S. officinarum	Mislabeled
SAC0163	In 84-045	WD1-SC-12-27	Barbados	Barbados	0.106	0.403	0.121	0.003	0.366	S. robustum	S. robustum_S. spontaneum_S. officinarum_S. barberi	Hybrid
SAC0164	Ng 77-055	WD1-SC-13-15	Papua New Guinea	Papua New Guinea	0.001	0.004	0.992	0.001	0.001	S. robustum	S. officinarum	Mislabeled
SAC0166	Ij 76-482	WD1-SC-13-29	Indonesia	Indonesia	0.014	0.004	0.776	0.007	0.199	S. robustum	S. officinarum_S. spontaneum	Mislabeled
SAC0175	Ng 77-94	WD1-SC-15-19	Barbados	Barbados	0.011	0.018	0.655	0.029	0.288	S. robustum	S. officinarum_S. spontaneum	Mislabeled
SAC0200	Ij 76-496	WD1-SC-22-31	Indonesia	Indonesia	0.004	0.002	0.769	0.009	0.217	S. robustum	S. officinarum_S. spontaneum	Mislabeled
SAC0320	IJ 76-547	WD1-SC-03-18	Barbados	Barbados	0.001	0.027	0.968	0.002	0.001	S. robustum	S. officinarum	Mislabeled
SAC0321	IN 84-045	WD1-SC-03-21	Barbados	Barbados	0.037	0.403	0.157	0.009	0.394	S. robustum	S. robustum_S. spontaneum_S. officinarum_	Hybrid
SAC0344	NG 77-024	WD1-SC-05-07	Papua New Guinea	Papua New Guinea	0.002	0.003	0.99	0.002	0.002	S. robustum	S. officinarum	Mislabeled
SAC0391	NG 57-238	WD1-SC-08-14	Unknown	Unknown	0.006	0.295	0.455	0.032	0.211	S. robustum	S. officinarum_S. robustum_S. spontaneum	Mislabeled
SAC0392	IM 76-234	WD1-SC-08-18	Barbados	Barbados	0.001	0.002	0.995	0.001	0.001	S. robustum	S. officinarum	Mislabeled
SAC0395	IJ 76-414	WD1-SC-08-22	Barbados	Barbados	0.006	0.165	0.564	0.011	0.255	S. robustum	S. officinarum_S. spontaneum_S. robustum	Mislabeled
SAC0424	NG 77-122	WD1-SC-10-17N	Barbados	Barbados	0.995	0.002	0.002	0.001	0.001	S. robustum	S. barberi	Mislabeled
SAC0426	IN 84-045	WD1-SC-10-18	Barbados	Barbados	0.036	0.408	0.154	0.009	0.394	S. robustum	S. robustum_S. officinarum_S. spontaneum	Hybrid
SAC0449	MOL 6077	WD1-SC-12-01	US	United States Hawaii	0.005	0.002	0.882	0.057	0.054	S. robustum	S. officinarum	Mislabeled
SAC0460	IJ 76-414	WD1-SC-12-26	Barbados	Barbados	0.023	0.405	0.166	0.008	0.398	S. robustum	S. robustum_S. officinarum_S. spontaneum	Hybrid
SAC0461	NG 28-251	WD1-SC-12-28	Guadeloupe	Guadeloupe	0.026	0.391	0.191	0.009	0.383	S. robustum	S. robustum_S. officinarum_S. spontaneum	Hybrid
SAC0474	NG 77-39	WD1-SC-13-08	Barbados	Barbados	0.002	0.491	0.015	0.002	0.489	S. robustum	S. robustum_S. spontaneum	Mislabeled
SAC0481	MOL 6077	WD1-SC-13-20	US	United States Hawaii	0.002	0.001	0.865	0.049	0.083	S. robustum	S. officinarum	Mislabeled
SAC0489	IJ 76-435	WD1-SC-13-30	Indonesia	Indonesia	0.001	0.001	0.995	0.002	0.001	S. robustum	S. officinarum	Mislabeled
SAC0490	FIJI 1	WD1-SC-13-32	Australia	Australia Queensland	0.003	0.003	0.882	0.1	0.013	S. robustum	S. officinarum	Mislabeled
SAC0594	NG 57-024	WD1-SC-19-20	US	United States	0.001	0.003	0.992	0.001	0.002	S. robustum	S. officinarum	Mislabeled
SAC0601	IJ 76-480	WD1-SC-19-37	Barbados	Barbados	0.005	0.268	0.261	0.008	0.459	S. robustum	S. robustum_S. officinarum_S. spontaneum	Mislabeled
SAC0602	IJ 76-480	WD1-SC-19-38	Barbados	Barbados	0.001	0.002	0.991	0.001	0.005	S. robustum	S. officinarum	Mislabeled
SAC0671	MOL 6091	GH 1 (T18), 1 (T24)	US	United States Hawaii	0.02	0.003	0.655	0.028	0.294	S. robustum	S. officinarum_S. spontaneum	Mislabeled
SAC0687	M 3035/66	GH 2 (T22)	Unknown	Unknown	0.003	0.005	0.972	0.017	0.002	S. robustum	S. officinarum	Mislabeled
SAC0689	IM 76-228	GH 2 (T22)	Unknown	Unknown	0.001	0.394	0.001	0.001	0.603	S. robustum	S. robustum_S. spontaneum	Mislabeled
SAC0708	Molokai 5099	LH 1 (T5)	Unknown	Unknown	0.005	0.203	0.531	0.011	0.251	S. robustum	S. officinarum_S. robustum_S. spontaneum	Mislabeled
SAC0725	US 57-159-13	LH 2 (T2)	Unknown	Unknown	0.002	0.007	0.987	0.002	0.003	S. robustum	S. officinarum	Mislabeled
SAC0740	IM 76-232	FSN 1 (R10)	Unknown	Unknown	0.001	0.412	0.001	0.001	0.585	S. robustum	S. spontaneum_S. robustum	Mislabeled
SAC0744	IN 84-052	FSN 1 (R12)	Unknown	Unknown	0.001	0.001	0.002	0.076	0.921	S. robustum	S. spontaneum_	Mislabeled
SAC0763	NG 77-107	FSN 3 (R11)	Unknown	Unknown	0.002	0.001	0.99	0.001	0.006	S. robustum	S. officinarum	Mislabeled
SAC0100	Javari Kabbu	WD1-SC-02-04	Unknown	Unknown	0.345	0.141	0.27	0.002	0.242	S. officinarum	S. barberi_S. robustum_S. officinarum_S. spontaneum	Mislabeled
SAC0103	Ik 76-060	WD1-SC-02-16	Unknown	Unknown	0.004	0.21	0.781	0.004	0.001	S. officinarum	S. officinarum_S. robustum	Hybrid
SAC0104	Ik 76-059	WD1-SC-02-17	Australia	Brisbane Australia	0.007	0.342	0.059	0.272	0.32	S. officinarum	S. robustum_S. spontaneum_S. sinense	Mislabeled
SAC0109	Madera	WD1-SC-03-04	Spain	Spain	0.077	0.419	0.144	0.005	0.354	S. officinarum	S. robustum_S. officinarum_S. spontaneum	Mislabeled
SAC0111	Ng 21-003	WD1-SC-03-14	Unknown	Unknown	0.001	0.997	0.001	0.001	0	S. officinarum	S. robustum	Mislabeled
SAC0117	S. Off. Andrea	WD1-SC-05-12	Unknown	Unknown	0.001	0.997	0.001	0.001	0	S. officinarum	S. robustum	Mislabeled
SAC0119	Ng 77-016	WD1-SC-05-21	Papua New Guinea	Papua New Guinea	0.001	0.001	0	0.997	0.001	S. officinarum	S. sinense	Mislabeled
SAC0120	Puri	WD1-SC-06-04	Indonesia	Indonesia	0.001	0.001	0	0.998	0	S. officinarum	S. sinense	Mislabeled
SAC0121	Pundia	WD1-SC-06-05	Cuba	Cuba La Habana	0.001	0.001	0	0.997	0	S. officinarum	S. sinense	Mislabeled
SAC0169	620 S. Off.	WD1-SC-14-12	Unknown	Unknown	0.003	0.016	0.319	0.239	0.423	S. officinarum	S. spontaneum_S. officinarum_S. sinense	Mislabeled
SAC0240	IJ 76-478	WD1-SC-43-50	Indonesia	Indonesia	0.001	0.001	0	0.001	0.998	S. officinarum	S. spontaneum_	Mislabeled
SAC0249	Barbados White Sport	WD1-SC-01-10	India	India	0.001	0.012	0.303	0.245	0.439	S. officinarum	S. spontaneum_S. officinarum_S. sinense	Mislabeled
SAC0253	NG 28-213	WD1-SC-04-27	Papua New Guinea	Papua New Guinea	0.998	0.001	0	0.001	0.001	S. officinarum	S. barberi	Mislabeled
SAC0255	NG 77-065	lath house	Papua New Guinea	Papua New Guinea	0.001	0.997	0.001	0.001	0	S. officinarum	S. robustum	Mislabeled
SAC0256	Pundia	WD1-SC-06-05	Cuba	Cuba La Habana	0	0.001	0	0.998	0.001	S. officinarum	S. sinense	Mislabeled
SAC0264	Hinahina	lath house	US	United States	0.001	0.998	0	0.001	0	S. officinarum	S. robustum	Mislabeled
SAC0265	NG 57-127	lath house	Barbados	Barbados	0.001	0.993	0.001	0.004	0.001	S. officinarum	S. robustum	Mislabeled
SAC0276	IJ 76-478	WD1-SC-43-50	Indonesia	Indonesia	0.001	0.001	0.001	0.001	0.998	S. officinarum	S. spontaneum_	Mislabeled
SAC0279	NG 28-279	full sun nursery	Unknown	Unknown	0.001	0.995	0.001	0.003	0	S. officinarum	S. robustum	Mislabeled
SAC0280	NG 57-076	lath house	Unknown	Unknown	0.003	0.991	0.003	0.002	0	S. officinarum	S. robustum	Mislabeled
SAC0281	NG 57-242	greenhouse	Unknown	Unknown	0.001	0.997	0	0.001	0	S. officinarum	S. robustum	Mislabeled
SAC0287	26Q2873	WD1-SC-01-01	US	United States Hawaii	0.002	0.634	0.003	0.36	0	S. officinarum	S. robustum_S. sinense	Mislabeled
SAC0288	AKOKI 22	WD1-SC-01-02	US	Hawaii	0.004	0.255	0.722	0.016	0.002	S. officinarum	S. officinarum_S. robustum	Hybrid
SAC0289	ANOMAN	WD1-SC-01-03	Papua New Guinea	New Guinea	0.004	0.238	0.729	0.024	0.004	S. officinarum	S. officinarum_S. robustum	Hybrid
SAC0290	ARUNDOID C	WD1-SC-01-05	US	United States Hawaii	0.079	0.356	0.516	0.034	0.015	S. officinarum	S. officinarum_S. robustum	Hybrid
SAC0292	BANDJARMASIN HITAM	WD1-SC-01-09	Indonesia	Java Indonesia	0.002	0.012	0.316	0.251	0.419	S. officinarum	S. spontaneum_S. officinarum_S. sinense	Mislabeled
SAC0317	MOL 6063	WD1-SC-03-09	US	Hawaii	0.001	0.995	0.001	0.001	0.002	S. officinarum	S. robustum	Mislabeled
SAC0318	MUNTOK JAVA	WD1-SC-03-10	Indonesia	Indonesia	0.002	0.009	0.327	0.238	0.424	S. officinarum	S. spontaneum_S. officinarum_S. sinense	Mislabeled
SAC0323	NG 28-014 (SS 58-08)	WD1-SC-03-26	Papua New Guinea	Papua New Guinea	0	0.998	0.001	0	0	S. officinarum	S. robustum	Mislabeled
SAC0324	NG 28-043B	WD1-SC-03-33	Unknown	Unknown	0.001	0.002	0	0.996	0	S. officinarum	S. sinense	Mislabeled
SAC0326	NG 57-072	WD1-SC-04-01	Papua New Guinea	Papua New Guinea	0.997	0.001	0	0.001	0.001	S. officinarum	S. barberi	Mislabeled
SAC0329	NG 51 148	WD1-SC-04-07	Papua New Guinea	Papua New Guinea	0.001	0.997	0.001	0.001	0	S. officinarum	S. robustum	Mislabeled
SAC0333	NG 51 042	WD1-SC-04-15	Papua New Guinea	Papua New Guinea	0.998	0.001	0	0.001	0	S. officinarum	S. barberi	Mislabeled
SAC0334	NG 51 038	WD1-SC-04-16	Papua New Guinea	Papua New Guinea	0.997	0.001	0	0.001	0.001	S. officinarum	S. barberi	Mislabeled
SAC0342	BA 11569	WD1-SC-05-01	Barbados	Barbados	0.004	0.238	0.275	0.008	0.475	S. officinarum	S. spontaneum_S. robustum_S. officinarum	Mislabeled
SAC0357	P-MAG-84-13	WD1-SC-06-11	Philippines	Philippines	0.027	0.387	0.02	0.117	0.449	S. officinarum	S. spontaneum_S. robustum_S. sinense	Mislabeled
SAC0358	P-MAG-84-2	WD1-SC-06-12	Philippines	Philippines	0.02	0.408	0.018	0.118	0.436	S. officinarum	S. spontaneum_S. robustum_S. sinense	Mislabeled
SAC0360	8276	WD1-SC-06-21	Malaysia	Malaysia	0.004	0.206	0.784	0.005	0.001	S. officinarum	S. officinarum_S. robustum	Hybrid
SAC0361	BNS 1070	WD1-SC-06-25	Guadeloupe	Guadeloupe	0.001	0.996	0.002	0.001	0	S. officinarum	S. robustum	Mislabeled
SAC0364	NG 77-137	WD1-SC-06-32	Papua New Guinea	Papua New Guinea	0.002	0.236	0.735	0.021	0.006	S. officinarum	S. officinarum_S. robustum	Hybrid
SAC0365	NG 77-135	WD1-SC-06-33	Papua New Guinea	Papua New Guinea	0.001	0.257	0.704	0.034	0.004	S. officinarum	S. officinarum_S. robustum	Hybrid
SAC0366	8275	WD1-SC-07-01	Malaysia	Malaysia	0.003	0.238	0.756	0.003	0	S. officinarum	S. officinarum_S. robustum	Hybrid
SAC0383	YELLOW BAMBOO (SEED)	WD1-SC-08-03	Unknown	Unknown	0.001	0.997	0.001	0.001	0	S. officinarum	S. robustum	Mislabeled
SAC0384	NOT KOKEA (SEED)	WD1-SC-08-04	US	United States	0	0.375	0.623	0.001	0.001	S. officinarum	S. officinarum_S. robustum	Hybrid
SAC0387	NG 57 213 (SEED)	GH	Papua New Guinea	Papua New Guinea	0.005	0.991	0.001	0.002	0.001	S. officinarum	S. robustum	Mislabeled
SAC0394	NG 57-030	WD1-SC-08-21	Guadeloupe	Guadeloupe	0.002	0.367	0.611	0.003	0.016	S. officinarum	S. officinarum_S. robustum	Hybrid
SAC0421	MAURITIOUS GUINGHAM	WD1-SC-10-10	Guadeloupe	Guadeloupe	0.009	0.223	0.51	0.01	0.248	S. officinarum	S. officinarum_S. barberi	Hybrid
SAC0422	MOGALI	WD1-SC-10-11	Barbados	Barbados	0.005	0.265	0.476	0.009	0.244	S. officinarum	S. officinarum_S. robustum_S. spontaneum	Hybrid
SAC0423	NG 57-030	WD1-SC-10-13	Guadeloupe	Guadeloupe	0.001	0.349	0.623	0.004	0.023	S. officinarum	S. officinarum_S. robustum	Hybrid
SAC0454	HINAHINA	WD1-SC-12-12	US	United States	0.001	0.998	0	0.001	0	S. officinarum	S. robustum	Mislabeled
SAC0458	HORNE	WD1-SC-12-24	Barbados	Barbados	0.021	0.389	0.197	0.007	0.386	S. officinarum	S. robustum_S. officinarum_S. spontaneum	Mislabeled
SAC0469	AKOKI 22	WD1-SC-13-03	US	United States Hawaii	0.006	0.253	0.709	0.03	0.002	S. officinarum	S. officinarum_S. robustum	Hybrid
SAC0494	UB 14	WD1-SC-14-04	US	United States Maryland	0.001	0.404	0.001	0.594	0.001	S. officinarum	S. sinense_S. robustum	Mislabeled
SAC0511	HC 71	WD1-SC-15-04	US	United States	0.001	0.995	0.001	0.003	0	S. officinarum	S. robustum	Mislabeled
SAC0538	BA 11569	WD1-SC-16-18	Barbados	Barbados	0.011	0.29	0.223	0.013	0.462	S. officinarum	S. spontaneum_S. robustum_S. officinarum	Mislabeled
SAC0577	CHINO	WD1-SC-18-12	US	United States Hawaii	0.001	0.001	0.001	0.997	0.001	S. officinarum	S. sinense	Mislabeled
SAC0659	IJ 76-478	FSN 1 (R7)	Indonesia	Indonesia	0.002	0.893	0.002	0.103	0	S. officinarum	S. robustum	Mislabeled
SAC0660	IJ 76-324	GH 1 (T18), 1 (T24)	Indonesia	Indonesia	0.001	0.997	0.001	0.001	0	S. officinarum	S. robustum	Mislabeled
SAC0664	IJ 76-477	LH 2 (T2)	Barbados	Barbados	0.001	0.963	0.028	0.007	0	S. officinarum	S. robustum	Mislabeled
SAC0712	NG 51-192	LH 1 (T5)	Unknown	Unknown	0.017	0.012	0.757	0.002	0.211	S. officinarum	S. officinarum_S. spontaneum	Hybrid
SAC0721	Halalii	LH 2 (T2)	Unknown	Unknown	0.001	0.994	0.001	0.004	0	S. officinarum	S. robustum	Mislabeled
SAC0734	SS 60-001 (CATO)	LH 3 (T5)	Unknown	Unknown	0.001	0.001	0.745	0.023	0.23	S. officinarum	S. officinarum_S. spontaneum	Hybrid
SAC0735	Uba Del Natal	LH 3 (T5)	Unknown	Unknown	0.001	0.001	0	0.997	0.001	S. officinarum	S. sinense	Mislabeled
SAC0738	57 NG-14	LH 3 (T6)	Unknown	Unknown	0.001	0.998	0.001	0.001	0	S. officinarum	S. robustum	Mislabeled
SAC0757	IJ 76-477 IJ 76-447 on pot	FSN 2 (R7)	Unknown	Unknown	0.002	0.97	0.02	0.007	0	S. officinarum	S. robustum	Mislabeled
SAC1470	P-Mag-84-2-North_infected_offshoot	WD1-SC-06-12_North-A	Philippines	Philippines	0.013	0.395	0.015	0.125	0.452	S. officinarum	S. spontaneum_S. robustum_S. sinense	Mislabeled
SAC0138	Kerah	WD1-SC-09-22	Indonesia	Indonesia Java	0	0	0.001	0.001	0.998	S. sinense	S. spontaneum	Mislabeled
SAC0146	Agoule	WD1-SC-11-05	India	India Tamil Nadu	0.003	0.008	0.982	0.002	0.005	S. sinense	S. officinarum	Mislabeled
SAC0149	Lu Cane	WD1-SC-11-22	China	China	0.133	0.019	0.002	0.14	0.705	S. sinense	S. spontaneum_S. barberi_S. sinense	Mislabeled
SAC0174	Khakai	WD1-SC-15-13	India	India Tamil Nadu	0.006	0.132	0.847	0.003	0.011	S. sinense	S. officinarum	Mislabeled
SAC0188	Japonesa	WD1-SC-20-18	Costa Rica	Costa Rica Cartago	0.994	0.001	0.003	0.001	0.001	S. sinense	S. barberi	Mislabeled
SAC0192	Kerah	WD1-SC-20-20	Indonesia	Indonesia Java	0.001	0.001	0.001	0.001	0.997	S. sinense	S. spontaneum_	Mislabeled
SAC0262	Tanzhou	WD1-SC-09-33	China	China Guangxi	0.002	0.016	0.978	0.002	0.002	S. sinense	S. officinarum	Mislabeled
SAC0270	Lu cane	WD1-SC-20-21	China	China	0.126	0.035	0.002	0.155	0.682	S. sinense	S. spontaneum_S. sinense_S. barberi	Mislabeled
SAC0271	Oshima	greenhouse	Japan	Japan	0.001	0.001	0.001	0.001	0.996	S. sinense	S. spontaneum_	Mislabeled
SAC0451	AGOULE	WD1-SC-12-07	India	India Tamil Nadu	0.002	0.012	0.97	0.003	0.013	S. sinense	S. officinarum	Mislabeled
SAC0471	AGOULE	WD1-SC-13-05	India	India Tamil Nadu	0.019	0.002	0.966	0.001	0.011	S. sinense	S. officinarum	Mislabeled
SAC0512	SINENSE	WD1-SC-15-06	India	India	0.993	0.001	0.003	0.002	0.001	S. sinense	S. barberi	Mislabeled
SAC0532	LOUJE	WD1-SC-16-06	China	China Guangxi	0.001	0.015	0.981	0.001	0.001	S. sinense	S. officinarum	Mislabeled
SAC0533	YUEGSEN	WD1-SC-16-07	China	China	0.029	0.024	0.334	0.062	0.551	S. sinense	S. spontaneum_S. officinarum	Mislabeled
SAC0534	ZWINGA	WD1-SC-16-08	South Africa	South Africa Kwazulu-natal	0.003	0.009	0.816	0.03	0.141	S. sinense	S. officinarum	Mislabeled
SAC0614	KAVANGIRE	WD1-SC-20-19	Argentina	Argentina Tucuman	0.994	0.002	0.002	0.001	0.001	S. sinense	S. barberi	Mislabeled
SAC0647	JAPONESA	WD1-SC-22-03	Costa Rica	Costa Rica Cartago	0.993	0.001	0.002	0.002	0.002	S. sinense	S. barberi	Mislabeled
SAC0656	AGOULE	WD1-SC-22-36	India	India Tamil Nadu	0.051	0.003	0.939	0.002	0.006	S. sinense	S. officinarum	Mislabeled
SAC0739	Gungera	FSN 1 (R10)	Unknown	Unknown	0.995	0.001	0.002	0.001	0.001	S. sinense	S. barberi	Mislabeled
SAC0206	IN 84-089	WD1-SC-39-19	Indonesia	Indonesia	0.005	0.038	0.089	0.171	0.698	S. spontaneum	S. spontaneum_S. sinense	Hybrid
SAC0225	IN 84-088	WD1-SC-41-44	Indonesia	Indonesia	0.004	0.037	0.076	0.173	0.71	S. spontaneum	S. spontaneum_S. sinense	Hybrid
SAC0854	IN 84-091	WD1-SC-37-92	Barbados	Barbados	0.006	0.043	0.085	0.162	0.705	S. spontaneum	S. spontaneum_S. sinense	Hybrid
SAC0944	IJ 76-125	WD1-SC-39-07	Unknown	Unknown	0.006	0.235	0.002	0.002	0.755	S. spontaneum	S. spontaneum_S. robustum	Hybrid
SAC0946	IJ 76-421	WD1-SC-39-10	Unknown	Unknown	0.003	0.242	0.001	0.001	0.753	S. spontaneum	S. spontaneum_S. robustum	Hybrid
SAC0972	IS 76-125	WD1-SC-39-56	Indonesia	Indonesia	0.005	0.235	0.001	0.002	0.758	S. spontaneum	S. spontaneum_S. robustum	Hybrid
SAC0976	MOL 1032	WD1-SC-39-63	Unknown	Unknown	0.002	0.001	0.209	0.002	0.786	S. spontaneum	S. spontaneum_S. officinarum	Hybrid
SAC1012	SM 7916	WD1-SC-39-138	Unknown	Unknown	0.01	0.111	0.23	0.04	0.609	S. spontaneum	S. spontaneum_S. officinarum	Hybrid
SAC1024	US 58-0004-01	WD1-SC-39-158	Unknown	Unknown	0.007	0.462	0.001	0.001	0.529	S. spontaneum	S. spontaneum_S. robustum	Hybrid
SAC1054	IN 84-072	WD1-SC-41-29	Indonesia	Indonesia	0.003	0.208	0.784	0.004	0.002	S. spontaneum	S. officinarum_S. robustum	Mislabeled
SAC1091	PCA NOR 84-5	WD1-SC-41-100	Philippines	Philippines	0.002	0.052	0.064	0.105	0.777	S. spontaneum	S. spontaneum_S. sinense	Hybrid

## Sheet: Table S7
Table S7. List of 412 core members of five Saccharum species. Each core member had a unique genotype and a >=0.8 popualtion membership, based on STRUCTURE analysis.
Sample.name	Species	Clone name	Location*	Country of origin	ORIGIN
SAC140	S. barberi	Matna Shahj	WD1-SC-10-15	India	India Tamil Nadu
SAC142	S. barberi	Rounda	WD1-SC-10-26	India	India Tamil Nadu
SAC187	S. barberi	Ganapathy	WD1-SC-18-28	India	India Tamil Nadu
SAC272	S. barberi	Ganapathy	WD1-SC-21-02	India	India Tamil Nadu
SAC273	S. barberi	Mangwa	lath house	India	India Tamil Nadu
SAC0389	S. barberi	REORI	WD1-SC-08-12	India	India Tamil Nadu
SAC0514	S. barberi	MESANGEN	WD1-SC-15-08	Guyana	Guyana
SAC0631	S. barberi	SONABILE	WD1-SC-21-15	India	India Tamil Nadu
SAC0632	S. barberi	TERERU	WD1-SC-21-16	India	India Tamil Nadu
SAC0672	S. barberi	Khari	FSN 1 (R8)	India	India Tamil Nadu
SAC0673	S. barberi	Matki Mango	LH 3 (T1)	India	India Tamil Nadu
SAC0686	S. barberi	Rakhra	GH 2 (T22)	Unknown	Unknown
SAC0722	S. barberi	New Siberian (Paunra)	LH 2 (T2)	Unknown	Unknown
SAC0731	S. barberi	Pathri	LH 3 (T1)	Unknown	Unknown
SAC0732	S. barberi	White Pararia	LH 3 (T2)	Unknown	Unknown
SAC0417	S. barberi	GANAPATHY	WD1-SC-10-01	India	India Tamil Nadu
SAC0627	S. barberi	KHATUIA	WD1-SC-21-04	India	India Tamil Nadu
SAC0628	S. barberi	KUSWAR	WD1-SC-21-05	India	India Tamil Nadu
SAC0629	S. barberi	MANGWA	WD1-SC-21-06	India	India Tamil Nadu
SAC0468	S. robustum/S. edule	IJ 76-375	WD1-SC-13-02	Indonesia	Indonesia
SAC0491	S. robustum/S. edule	IJ 76-375	WD1-SC-13-34	Indonesia	Indonesia
SAC0695	S. robustum/S. edule	IJ 76-337	GH 3 (T14)	Unknown	Unknown
SAC111	S. robustum	Ng 21-003	WD1-SC-03-14	Unknown	Unknown
SAC117	S. robustum	S. Off. Andrea	WD1-SC-05-12	Unknown	Unknown
SAC255	S. robustum	NG 77-065	lath house	Papua New Guinea	Papua New Guinea
SAC264	S. robustum	Hinahina	lath house	US	United States
SAC265	S. robustum	NG 57-127	lath house	Barbados	Barbados
SAC279	S. robustum	NG 28-279	full sun nursery	Unknown	Unknown
SAC280	S. robustum	NG 57-076	lath house	Unknown	Unknown
SAC281	S. robustum	NG 57-242	greenhouse	Unknown	Unknown
SAC0317	S. robustum	MOL 6063	WD1-SC-03-09	US	Hawaii
SAC0323	S. robustum	NG 28-014 (SS 58-08)	WD1-SC-03-26	Papua New Guinea	Papua New Guinea
SAC0329	S. robustum	NG 51 148	WD1-SC-04-07	Papua New Guinea	Papua New Guinea
SAC0361	S. robustum	BNS 1070	WD1-SC-06-25	Guadeloupe	Guadeloupe
SAC0383	S. robustum	YELLOW BAMBOO (SEED)	WD1-SC-08-03	Unknown	Unknown
SAC0387	S. robustum	NG 57 213 (SEED)	GH	Papua New Guinea	Papua New Guinea
SAC0454	S. robustum	HINAHINA	WD1-SC-12-12	US	United States
SAC0659	S. robustum	IJ 76-478	FSN 1 (R7)	Indonesia	Indonesia
SAC0660	S. robustum	IJ 76-324	GH 1 (T18), 1 (T24)	Indonesia	Indonesia
SAC0664	S. robustum	IJ 76-477	LH 2 (T2)	Barbados	Barbados
SAC0721	S. robustum	Halalii	LH 2 (T2)	Unknown	Unknown
SAC0738	S. robustum	57 NG-14	LH 3 (T6)	Unknown	Unknown
SAC115	S. robustum	Ng 28-289	WD1-SC-04-09	Papua New Guinea	Papua New Guinea Or Guadeloupe
SAC122	S. robustum	Ng 77-148	WD1-SC-06-07	Barbados	Barbados
SAC129	S. robustum	Ij 76-547	WD1-SC-08-23	Barbados	Mia Q # = Barbados
SAC139	S. robustum	Ng 77-094	WD1-SC-09-29	Guadeloupe	Guadeloupe
SAC167	S. robustum	Ij 76-547	WD1-SC-13-33	Barbados	Barbados
SAC173	S. robustum	Ng 57-012	WD1-SC-15-10	US	United States
SAC199	S. robustum	Ng 57 054	WD1-SC-22-30	Papua New Guinea	Papua New Guinea
SAC260	S. robustum	NG 77-094	lath house	Papua New Guinea	Papua New Guinea
SAC0322	S. robustum	IJ 76-547	WD1-SC-03-22	Guadeloupe	Guadeloupe
SAC0327	S. robustum	NG 77-094	WD1-SC-04-03	Guadeloupe	Guadeloupe
SAC0328	S. robustum	IN 81-014	WD1-SC-04-06	Barbados	Barbados
SAC0330	S. robustum	NG 77-021	WD1-SC-04-10	Papua New Guinea	Papua New Guinea Or Guadeloupe
SAC0336	S. robustum	NG 57-208	WD1-SC-04-22	Unknown	Mia#=hawaii; Q#=guadeloupe
SAC0347	S. robustum	NG 57-238	WD1-SC-05-18	Barbados	Barbados
SAC0353	S. robustum	NG 77-136	WD1-SC-05-33	Barbados	Barbados
SAC0396	S. robustum	NG 77-094	WD1-SC-08-32	Papua New Guinea	Papua New Guinea
SAC0414	S. robustum	NG 77-235	WD1-SC-09-28	Papua New Guinea	Papua New Guinea
SAC0419	S. robustum	IS 76-138	WD1-SC-10-08	Guadeloupe	Guadeloupe
SAC0427	S. robustum	NG 57-238	WD1-SC-10-19	Barbados	Barbados
SAC0436	S. robustum	NG 57-208	WD1-SC-11-11	US	United States Hawaii
SAC0444	S. robustum	S. ROBUSTUM	WD1-SC-11-23	Unknown	Unknown
SAC0447	S. robustum	NG 57-208	WD1-SC-11-34	US	United States Hawaii
SAC0465	S. robustum	NG 77-021	WD1-SC-12-34	Guadeloupe	Guadeloupe
SAC0480	S. robustum	IN 81-014	WD1-SC-13-19	Barbados	Barbados
SAC0485	S. robustum	IN 81-014	WD1-SC-13-25Bsouth	Barbados	Barbados
SAC0501	S. robustum	NG 77-21	WD1-SC-14-18	Barbados	Barbados
SAC0595	S. robustum	NG 77-21	WD1-SC-19-23	Barbados	Barbados
SAC0596	S. robustum	NG 57 055	WD1-SC-19-25	Papua New Guinea	Papua New Guinea
SAC0598	S. robustum	NG 57-238	WD1-SC-19-32	Barbados	Barbados
SAC0599	S. robustum	NG 77-54	WD1-SC-19-35	Barbados	Barbados
SAC0625	S. robustum	NG 77-021	WD1-SC-20-34	Guadeloupe	Guadeloupe
SAC0662	S. robustum	NG 77-054	GH 2 (T21)	Papua New Guinea	Papua New Guinea Or Guadeloupe	662
SAC0667	S. robustum	NG 77-159	GH 3 (T14)	Papua New Guinea	Papua New Guinea
SAC0690	S. robustum	IN 84-076	GH 2 (T22)	Unknown	Unknown
SAC0697	S. robustum	IN 84-050	GH 3 (T22)	Unknown	Unknown
SAC0699	S. robustum	NG 77-147	GH 3 (T22), 3 (T14)	Unknown	Unknown
SAC0701	S. robustum	IS 76-184	LH 1 (T2)	Unknown	Unknown
SAC0772	S. robustum	MOL 45 003	FSN 6 (R6)	Unknown	Mol 45 003
SAC1234	S. robustum	NG 57-208	WD1-SC-43-178	US	United States Hawaii
SAC145	S. officinarum	Sunnabile	WD1-SC-10-30	India	India Tamil Nadu
SAC0580	S. officinarum	HEMJA	WD1-SC-18-30	US	United States Hawaii
SAC0730	S. officinarum	Newra	LH 3 (T1)	Unknown	Unknown
SAC095	S. officinarum	Old Java	WD1-SC-01-13	Virgin Islands	Virgin Islands
SAC096	S. officinarum	Chino	WD1-SC-01-20	US	Hawaii
SAC098	S. officinarum	Green German	WD1-SC-01-30	India	India
SAC101	S. officinarum	Iscambine	WD1-SC-02-05	Mauritius	Mauritius
SAC102	S. officinarum	Q 058	WD1-SC-02-10	Australia	Queensland Australia
SAC107	S. officinarum	Hawaiian Original 52	WD1-SC-02-36	US	Hawaii
SAC108	S. officinarum	Louisiana Purple	WD1-SC-03-03	US	Maryland U.s.
SAC110	S. officinarum	Nc 024	WD1-SC-03-12	New Caledonia	New Caledonia
SAC116	S. officinarum	Ng 51-105	WD1-SC-04-11	Papua New Guinea	Papua New Guinea
SAC125	S. officinarum	Tip, Red	WD1-SC-07-15	Cuba	Cuba La Habana
SAC250	S. officinarum	IJ 76-319	lath house	Indonesia	Indonesia
SAC252	S. officinarum	NG 28-285	WD1-SC-04-18	Papua New Guinea	Papua New Guinea
SAC257	S. officinarum	Oi Kung	lath house	Myanmar	Myanmar
SAC258	S. officinarum	Red Tip	lath house	Malaysia	Malaysia
SAC259	S. officinarum	SS 57-01 (Awela Green)	WD1-SC-07-06	US	U.s. Hawaii
SAC269	S. officinarum	Don Cico	WD1-SC-20-35	Unknown	Unknown
SAC0291	S. officinarum	BAMBOO AMARILLA	WD1-SC-01-07	US	Hawaii Agricultural Research Center
SAC0293	S. officinarum	BLACK CHERIBON	WD1-SC-01-12	Australia	Queensland Australia
SAC0294	S. officinarum	BLACK INNES	WD1-SC-01-15	Unknown	Unknown
SAC0295	S. officinarum	BOURBORIET SURINAM	WD1-SC-01-16	Unknown	Unknown
SAC0296	S. officinarum	BADILLA	WD1-SC-01-17	Unknown	Unknown
SAC0297	S. officinarum	CHU-ZHE	WD1-SC-01-19	Unknown	Unknown
SAC0298	S. officinarum	F36-819	WD1-SC-01-23	US	Hawaii
SAC0299	S. officinarum	F36-819	WD1-SC-01-24	US	Hawaii
SAC0300	S. officinarum	IK 76-065	WD1-SC-01-25	US	Hawaii
SAC0301	S. officinarum	FIJI	WD1-SC-01-26	Unknown	Unknown
SAC0303	S. officinarum	HAWAIIAN ORIGINAL	WD1-SC-01-35	Taiwan	Taiwan
SAC0305	S. officinarum	KHAJURIA	WD1-SC-02-02	India	India
SAC0306	S. officinarum	IS 76-319	WD1-SC-02-06	Unknown	Unknown
SAC0307	S. officinarum	IK 76-108	WD1-SC-02-12	Australia	Brisbane Australia
SAC0308	S. officinarum	IK 76-069	WD1-SC-02-14	Australia	Brisbane Australia
SAC0309	S. officinarum	IJ 76-521	WD1-SC-02-21	Australia	Brisbane Australia
SAC0310	S. officinarum	IJ76-418B	WD1-SC-02-25	US	Hawaii
SAC0311	S. officinarum	IJ 76-418A PINK STALK	WD1-SC-02-26	Australia	Brisbane Australia
SAC0312	S. officinarum	IJ 76-316	WD1-SC-02-30	Indonesia	Indonesia
SAC0313	S. officinarum	IA 3330	WD1-SC-02-32	US	Hawaii
SAC0314	S. officinarum	HIND'S SPECIAL	WD1-SC-02-34	Philippines	Philippines
SAC0315	S. officinarum	HINAHINA 18	WD1-SC-02-35	US	Hawaii
SAC0316	S. officinarum	MANTEIGA	WD1-SC-03-07	Unknown	Dc
SAC0325	S. officinarum	NG 28 055	WD1-SC-03-34	Papua New Guinea	Papua New Guinea
SAC0331	S. officinarum	NG 51 099	WD1-SC-04-12	Papua New Guinea	Papua New Guinea
SAC0339	S. officinarum	NG 28 099	WD1-SC-04-31	Papua New Guinea	Papua New Guinea
SAC0340	S. officinarum	NG 28-087 O.P. PLANT 3	WD1-SC-04-32	Unknown	Unknown
SAC0341	S. officinarum	NG 28 033	WD1-SC-04-35	Papua New Guinea	Papua New Guinea
SAC0345	S. officinarum	NG 57 144	WD1-SC-05-09	Papua New Guinea	Papua New Guinea
SAC0348	S. officinarum	51NG9	WD1-SC-05-19	US	United States
SAC0349	S. officinarum	NG 77-042	WD1-SC-05-23	Papua New Guinea	Papua New Guinea Or Brazil
SAC0352	S. officinarum	NG 77-092	GH	Papua New Guinea	Papua New Guinea
SAC0354	S. officinarum	8272	WD1-SC-06-01	Malaysia	Malaysia
SAC0356	S. officinarum	P-MAG-84-21	WD1-SC-06-09	Philippines	Philippines
SAC0359	S. officinarum	PADANGSCHE DARK RED	WD1-SC-06-16	Spain	Spain Alicante
SAC0362	S. officinarum	NG 77-182	WD1-SC-06-29	Papua New Guinea	Papua New Guinea
SAC0367	S. officinarum	8284	WD1-SC-07-02	Malaysia	Malaysia
SAC0368	S. officinarum	SAIPAN	WD1-SC-07-03	India	India
SAC0369	S. officinarum	SPAANSCH	WD1-SC-07-05	US	U.s. Maryland
SAC0370	S. officinarum	SS 57-09	WD1-SC-07-08	Papua New Guinea	Papua New Guinea
SAC0371	S. officinarum	SYLVA	WD1-SC-07-12	Mauritius	Mauritius
SAC0372	S. officinarum	THA 82-84	WD1-SC-07-14	Thailand	Thailand
SAC0373	S. officinarum	UM 68-010	WD1-SC-07-17	Malaysia	Malaysia
SAC0385	S. officinarum	VELLAI	WD1-SC-08-05	Brazil	Brazil
SAC0401	S. officinarum	UM 68 -015	WD1-SC-09-02	Malaysia	Malaysia
SAC0420	S. officinarum	MANJRI RED	WD1-SC-10-09	Barbados	Barbados
SAC0470	S. officinarum	UAHI A PELE 50	WD1-SC-13-04	US	United States Hawaii
SAC0478	S. officinarum	BISCUIT	WD1-SC-13-17	Guadeloupe	Guadeloupe
SAC0492	S. officinarum	HC 71	WD1-SC-14-02	US	United States
SAC0505	S. officinarum	BADILA	WD1-SC-14-23	Unknown	Unknown
SAC0528	S. officinarum	UNKNOWN S. OFF.	WD1-SC-15-34	Unknown	Unknown
SAC0623	S. officinarum	MANJRI RED	WD1-SC-20-32	Barbados	Barbados
SAC0638	S. officinarum	BA 11569	WD1-SC-21-27	Barbados	Barbados
SAC0663	S. officinarum	NG 21 049	GH 1 (T18), 1 (T24)	Papua New Guinea	Papua New Guinea
SAC0675	S. officinarum	NG 57 095	GH 1 (pot on ground)	Unknown	Unknown
SAC0676	S. officinarum	NG 51 97	LH (T5)	Unknown	Unknown
SAC0677	S. officinarum	CL 41-0223	FSN	Unknown	Unknown
SAC0683	S. officinarum	CO 290	GH 2 (T14)	Unknown	Unknown
SAC0704	S. officinarum	Q 050	LH 1 (T3)	Unknown	Unknown
SAC0715	S. officinarum	NG 57-59	LH 1 (T5)	Unknown	Unknown
SAC0734	S. officinarum	SS 60-001 (CATO)	LH 3 (T5)	Unknown	Unknown
SAC0759	S. officinarum	NG 77-234	FSN 2 (R8)	Unknown	Unknown
SAC128	S. officinarum	Ng 77-238	WD1-SC-08-07	Papua New Guinea	Papua New Guinea
SAC164	S. officinarum	Ng 77-055	WD1-SC-13-15	Papua New Guinea	Papua New Guinea
SAC166	S. officinarum	Ij 76-482	WD1-SC-13-29	Indonesia	Indonesia
SAC200	S. officinarum	Ij 76-496	WD1-SC-22-31	Indonesia	Indonesia
SAC0320	S. officinarum	IJ 76-547	WD1-SC-03-18	Barbados	Barbados
SAC0344	S. officinarum	NG 77-024	WD1-SC-05-07	Papua New Guinea	Papua New Guinea
SAC0392	S. officinarum	IM 76-234	WD1-SC-08-18	Barbados	Barbados
SAC0449	S. officinarum	MOL 6077	WD1-SC-12-01	US	United States Hawaii
SAC0481	S. officinarum	MOL 6077	WD1-SC-13-20	US	United States Hawaii
SAC0490	S. officinarum	FIJI 1	WD1-SC-13-32	Australia	Australia Queensland
SAC0594	S. officinarum	NG 57-024	WD1-SC-19-20	US	United States
SAC0602	S. officinarum	IJ 76-480	WD1-SC-19-38	Barbados	Barbados
SAC0687	S. officinarum	M 3035/66	GH 2 (T22)	Unknown	Unknown
SAC0725	S. officinarum	US 57-159-13	LH 2 (T2)	Unknown	Unknown
SAC0763	S. officinarum	NG 77-107	FSN 3 (R11)	Unknown	Unknown
SAC146	S. sinense	Agoule	WD1-SC-11-05	India	India Tamil Nadu
SAC174	S. sinense	Khakai	WD1-SC-15-13	India	India Tamil Nadu
SAC262	S. sinense	Tanzhou	WD1-SC-09-33	China	China Guangxi
SAC0451	S. sinense	AGOULE	WD1-SC-12-07	India	India Tamil Nadu
SAC0471	S. sinense	AGOULE	WD1-SC-13-05	India	India Tamil Nadu
SAC0532	S. sinense	LOUJE	WD1-SC-16-06	China	China Guangxi
SAC0534	S. sinense	ZWINGA	WD1-SC-16-08	South Africa	South Africa Kwazulu-natal
SAC0656	S. sinense	AGOULE	WD1-SC-22-36	India	India Tamil Nadu
SAC0324	S. sinense	NG 28-043B	WD1-SC-03-33	Unknown	Unknown
SAC0472	S. sinense	UBA, NAQUIN	WD1-SC-13-06	US	United States Hawaii
SAC0515	S. sinense	KERAH	WD1-SC-15-15	Indonesia	Indonesia Java
SAC0529	S. sinense	TEKCHA, OKINAWA	WD1-SC-16-01	China	China
SAC0581	S. sinense	DARK PINDARIA	WD1-SC-18-31	India	India Tamil Nadu
SAC0613	S. sinense	CHUK CHE	WD1-SC-20-15	China	China Guangdong
SAC0619	S. sinense	MERTHI	WD1-SC-20-26	India	India Uttar Pradesh
SAC0620	S. sinense	MERTHI ZELL	WD1-SC-20-27	Cuba	Cuba La Habana
SAC0621	S. sinense	OSHIMA	WD1-SC-20-29	Japan	Japan
SAC0622	S. sinense	NEPAL 3	WD1-SC-20-31	Nepal	Nepal
SAC0646	S. sinense	TANZHOU	WD1-SC-22-01	China	China Guangxi
SAC0717	S. sinense	Baroukha 239	LH 2 (T1)	Unknown	Unknown
SAC0727	S. sinense	Tanzhou Bamboo Cane	LH 2 (T5)	Unknown	Unknown
SAC0729	S. sinense	Baroukha	LH 3 (T1)	Unknown	Unknown
SAC0735	S. sinense	Uba Del Natal	LH 3 (T5)	Unknown	Unknown
SAC0749	S. sinense	Tekcha	FSN 1 (R8)	Unknown	Unknown
SAC120	S. sinense	Puri	WD1-SC-06-04	Indonesia	Indonesia
SAC121	S. sinense	Pundia	WD1-SC-06-05	Cuba	Cuba La Habana
SAC126	S. sinense	Ng 77-136	WD1-SC-07-20	Guadeloupe	Guadeloupe
SAC171	S. sinense	Tekcha, Okinawa	WD1-SC-15-01	China	China
SAC172	S. sinense	Khagzi	WD1-SC-15-09	India	India Tamil Nadu
SAC178	S. sinense	Tukuyu Dist. No. 1	WD1-SC-16-02	Tanzania	Tanzania
SAC179	S. sinense	Uba India	WD1-SC-16-03	India	India
SAC184	S. sinense	Pansahi 204	WD1-SC-18-15	India	India
SAC186	S. sinense	Khagzi	WD1-SC-18-27	India	India Tamil Nadu
SAC190	S. sinense	Tekcha, Chiki Island	WD1-SC-22-02	China	China
SAC256	S. sinense	Pundia	WD1-SC-06-05	Cuba	Cuba La Habana
SAC266	S. sinense	Tekcha Chung Tseng or WD1-SC-22-04	WD1-SC-15-02	China	China
SAC0343	S. spontaneum (SE Asia)	IK 76-72	WD1-SC-05-06	Barbados	Barbados
SAC0793	S. spontaneum (SE Asia)	US 57-172-3	WD1-SC-37-36	Barbados	Barbados
SAC0795	S. spontaneum (SE Asia)	Pasuruan	WD1-SC-37-38	Barbados	Barbados
SAC0797	S. spontaneum (SE Asia)	IK 76-74	WD1-SC-37-40	Barbados	Barbados
SAC0814	S. spontaneum (SE Asia)	US 57-11-2	WD1-SC-37-69	Barbados	Barbados
SAC0815	S. spontaneum (SE Asia)	WI 80-2-1	WD1-SC-37-70	Barbados	Barbados
SAC0830	S. spontaneum (SE Asia)	51 NG 88	WD1-SC-37-77	Barbados	Barbados
SAC0831	S. spontaneum (SE Asia)	Map_Min	WD1-SC-37-81	Barbados	Barbados
SAC0832	S. spontaneum (SE Asia)	PBg 84-5	WD1-SC-37-82	Philippines	Philippines
SAC0834	S. spontaneum (SE Asia)	PCaV 84-5	WD1-SC-37-84	Philippines	Philippines
SAC0835	S. spontaneum (SE Asia)	PCaV 84-6	WD1-SC-37-87	Unknown	Unknown
SAC0852	S. spontaneum (SE Asia)	Panama	WD1-SC-37-90	Barbados	Barbados
SAC0853	S. spontaneum (SE Asia)	75-3-1,5,7	WD1-SC-37-91	Barbados	Barbados
SAC0858	S. spontaneum (SE Asia)	Aegypticum	WD1-SC-37-96	Barbados	Barbados
SAC0859	S. spontaneum (SE Asia)	S.B.	WD1-SC-37-97	Barbados	Barbados
SAC0861	S. spontaneum (SE Asia)	Kawanda	WD1-SC-37-98	Barbados	Barbados
SAC0864	S. spontaneum (SE Asia)	B 68264	WD1-SC-37-102	Barbados	Barbados
SAC0866	S. spontaneum (SE Asia)	CO_Local	WD1-SC-37-104	Barbados	Barbados
SAC0940	S. spontaneum (SE Asia)	Spont 43-60	WD1-SC-37-175	Unknown	Unknown
SAC0941	S. spontaneum (SE Asia)	SES 519	WD1-SC-37-176	Unknown	Unknown
SAC0948	S. spontaneum (SE Asia)	IN 84-35	WD1-SC-39-15	Unknown	Unknown
SAC0973	S. spontaneum (SE Asia)	IS 76-173	WD1-SC-39-59	Indonesia	Indonesia
SAC0980	S. spontaneum (SE Asia)	Okinawa No. 13	WD1-SC-39-72	Unknown	Unknown
SAC0981	S. spontaneum (SE Asia)	IK 76-66	WD1-SC-39-73	Barbados	Barbados
SAC0982	S. spontaneum (SE Asia)	PBG 84-7	WD1-SC-39-76	Philippines	Philippines
SAC0984	S. spontaneum (SE Asia)	PCA NOR 84-3	WD1-SC-39-79	Philippines	Philippines
SAC0985	S. spontaneum (SE Asia)	PCA NOR 84-4	WD1-SC-39-80	Brazil	Brazil
SAC0986	S. spontaneum (SE Asia)	PCA NOR 84-6	WD1-SC-39-81	Philippines	Philippines
SAC0987	S. spontaneum (SE Asia)	PCA SUR 84-1	WD1-SC-39-82	Philippines	Philippines
SAC0988	S. spontaneum (SE Asia)	PCA SUR 84-3	WD1-SC-39-83	Philippines	Philippines
SAC0989	S. spontaneum (SE Asia)	PCAV 84-06	WD1-SC-39-89	Brazil	Brazil
SAC0990	S. spontaneum (SE Asia)	PPGN 84-5	WD1-SC-39-93	Philippines	Philippines
SAC0991	S. spontaneum (SE Asia)	PQ 84-9	WD1-SC-39-95	Philippines	Philippines
SAC0992	S. spontaneum (SE Asia)	S 66-101	WD1-SC-39-97	Taiwan	Taiwan
SAC0997	S. spontaneum (SE Asia)	S. spont # 28	WD1-SC-39-109	Unknown	Unknown
SAC1000	S. spontaneum (SE Asia)	SES 092	WD1-SC-39-116	India	India
SAC1019	S. spontaneum (SE Asia)	Tainan 2n=096	WD1-SC-39-150	Guam	Guam
SAC1021	S. spontaneum (SE Asia)	Tongza	WD1-SC-39-154	China	China
SAC1031	S. spontaneum (SE Asia)	PPGN 84-8	WD1-SC-39-169	Unknown	Unknown
SAC1032	S. spontaneum (SE Asia)	PQ 84-4	WD1-SC-39-170	Philippines	Philippines
SAC1033	S. spontaneum (SE Asia)	P-Sor-84-13	WD1-SC-39-171	Philippines	Philippines
SAC1037	S. spontaneum (SE Asia)	IN 76-086	WD1-SC-39-176	Unknown	Unknown
SAC1041	S. spontaneum (SE Asia)	Formosa No. 4	WD1-SC-41-07	Taiwan	Taiwan
SAC1042	S. spontaneum (SE Asia)	Gehra-Bon	WD1-SC-41-08	India	India Tamil Nadu
SAC1046	S. spontaneum (SE Asia)	IK 76-067	WD1-SC-41-18	US	California United States
SAC1047	S. spontaneum (SE Asia)	IM 76-238	WD1-SC-41-22	Indonesia	Indonesia
SAC1048	S. spontaneum (SE Asia)	IN84-009	WD1-SC-41-23	Indonesia	Indonesia
SAC1049	S. spontaneum (SE Asia)	IN84-010	WD1-SC-41-24	Indonesia	Indonesia
SAC1050	S. spontaneum (SE Asia)	IN84-011	WD1-SC-41-25	Indonesia	Indonesia
SAC1052	S. spontaneum (SE Asia)	Sumatra #2	WD1-SC-41-27	Cuba	Cuba
SAC1055	S. spontaneum (SE Asia)	IS 76-222	WD1-SC-41-32	Barbados	Barbados
SAC1057	S. spontaneum (SE Asia)	IN84-069	WD1-SC-41-42	Indonesia	Indonesia
SAC1061	S. spontaneum (SE Asia)	IND-81-131	WD1-SC-41-50	India	India Tamil Nadu
SAC1077	S. spontaneum (SE Asia)	Kepandjen	WD1-SC-41-74	Indonesia	Indonesia Java
SAC1083	S. spontaneum (SE Asia)	Okinawa # 01	WD1-SC-41-84	Japan	Japan
SAC1084	S. spontaneum (SE Asia)	P-Dav 84-1	WD1-SC-41-86	Philippines	Philippines
SAC1085	S. spontaneum (SE Asia)	PAL-84-1	WD1-SC-41-89	Philippines	Philippines
SAC1086	S. spontaneum (SE Asia)	PAL-84-4	WD1-SC-41-90	Philippines	Philippines
SAC1087	S. spontaneum (SE Asia)	PAL-84-7	WD1-SC-41-92	Philippines	Philippines
SAC1088	S. spontaneum (SE Asia)	PCAV 84-13	WD1-SC-41-94	Philippines	Philippines
SAC1089	S. spontaneum (SE Asia)	PCAV 84-20	WD1-SC-41-96	Philippines	Philippines
SAC1090	S. spontaneum (SE Asia)	PCA NOR 84-1	WD1-SC-41-98	Philippines	Philippines
SAC1092	S. spontaneum (SE Asia)	PCA SUR 84-2	WD1-SC-41-102	Philippines	Philippines
SAC1093	S. spontaneum (SE Asia)	PCA SUR 84-8	WD1-SC-41-103	Philippines	Philippines
SAC1094	S. spontaneum (SE Asia)	Philippine "Wild"	WD1-SC-41-104	Philippines	Philippines
SAC1095	S. spontaneum (SE Asia)	Ponape Wild Slender	WD1-SC-41-106	Japan	Japan
SAC1096	S. spontaneum (SE Asia)	PPGN 84-2	WD1-SC-41-107	Philippines	Philippines
SAC1098	S. spontaneum (SE Asia)	PPGN 84-8	WD1-SC-41-109	Philippines	Philippines
SAC1099	S. spontaneum (SE Asia)	PQ 84-3	WD1-SC-41-110	Philippines	Philippines
SAC1100	S. spontaneum (SE Asia)	PTAR 84-2	WD1-SC-41-112	Philippines	Philippines
SAC1103	S. spontaneum (SE Asia)	S 66-084	WD1-SC-41-115	Taiwan	Taiwan
SAC1104	S. spontaneum (SE Asia)	S 66-105	WD1-SC-41-118	Taiwan	Taiwan
SAC1105	S. spontaneum (SE Asia)	S 66-142	WD1-SC-41-120	Taiwan	Taiwan
SAC1117	S. spontaneum (SE Asia)	PIN 84-1	WD1-SC-41-149	Philippines	Philippines
SAC1199	S. spontaneum (SE Asia)	IS 76-196	WD1-SC-43-106	Indonesia	Indonesia
SAC1200	S. spontaneum (SE Asia)	SES 073	WD1-SC-43-107	India	India Tamil Nadu
SAC1212	S. spontaneum (SE Asia)	SES 205B	WD1-SC-43-122	India	India
SAC1227	S. spontaneum (SE Asia)	Ruteng_Flo	WD1-SC-43-153	Barbados	Barbados
SAC1228	S. spontaneum (SE Asia)	Longchuan (Yunan)	WD1-SC-43-155	China	China
SAC1266	S. spontaneum (SE Asia)	SES 501	WD1-SC-45-33	India	India
SAC1267	S. spontaneum (SE Asia)	SES 517	WD1-SC-45-34	India	India
SAC1268	S. spontaneum (SE Asia)	SES 521	WD1-SC-45-35	India	India
SAC1277	S. spontaneum (SE Asia)	Taiwan spont 071	WD1-SC-45-56	Taiwan	Taiwan
SAC1278	S. spontaneum (SE Asia)	Taiwan spont 072	WD1-SC-45-58	Taiwan	Taiwan
SAC1303	S. spontaneum (SE Asia)	US 78-513	WD1-SC-45-105	Pakistan	Pakistan
SAC1306	S. spontaneum (SE Asia)	US 78-519	WD1-SC-45-112	Pakistan	Pakistan
SAC201	S. spontaneum (SE Asia)	Unknown (2009: R37-P052)	WD1-SC-37-52	Unknown	Unknown
SAC205	S. spontaneum (SE Asia)	IN 84-22	WD1-SC-39-14	Unknown	Unknown
SAC211	S. spontaneum (SE Asia)	Ng 77-176	WD1-SC-39-70	Papua New Guinea	Papua New Guinea
SAC215	S. spontaneum (SE Asia)	Ses 184 A	WD1-SC-39-118	Unknown	Unknown
SAC218	S. spontaneum (SE Asia)	SES 519	WD1-SC-39-133	India	India
SAC221	S. spontaneum (SE Asia)	Djantoer Ii (2)	WD1-SC-41-06	Indonesia	Indonesia
SAC222	S. spontaneum (SE Asia)	Glagah	WD1-SC-41-09	Argentina	Argentina
SAC226	S. spontaneum (SE Asia)	IS 76-192 (CANE 6148)	WD1-SC-41-68	Indonesia	Indonesia
SAC228	S. spontaneum (SE Asia)	PCAV 84-18	WD1-SC-41-95	Philippines	Philippines
SAC229	S. spontaneum (SE Asia)	PCA NOR 84-7	WD1-SC-41-101	Philippines	Philippines
SAC230	S. spontaneum (SE Asia)	S 66-088	WD1-SC-41-116	Taiwan	Taiwan
SAC232	S. spontaneum (SE Asia)	S 66-121	WD1-SC-41-119	Taiwan	Taiwan
SAC284	S. spontaneum (SE Asia)	US 4515	WD1-SC-45-69	Turkistan	Turkistan
SAC0790	S. spontaneum (India)	US 56-0019-01; -03	WD1-SC-37-32	Thailand	Thailand
SAC0791	S. spontaneum (India)	US 56-0008-02	WD1-SC-37-33	Thailand	Thailand
SAC0816	S. spontaneum (India)	IND-81-80	WD1-SC-37-72	India	India Tamil Nadu
SAC0857	S. spontaneum (India)	SES 091	WD1-SC-37-95	Guadeloupe	Guadeloupe
SAC0868	S. spontaneum (India)	Spont 14095	WD1-SC-37-106	Unknown	Unknown
SAC0869	S. spontaneum (India)	BB spont #1	WD1-SC-37-107	Unknown	Unknown
SAC0872	S. spontaneum (India)	IS 76-177	WD1-SC-37-110	Barbados	Barbados
SAC0950	S. spontaneum (India)	IND-81-7	WD1-SC-39-21	India	India Tamil Nadu
SAC0952	S. spontaneum (India)	IND. 81-16	WD1-SC-39-23	Unknown	Unknown
SAC0953	S. spontaneum (India)	IND. 81-30	WD1-SC-39-24	India	India
SAC0954	S. spontaneum (India)	IND. 81-38	WD1-SC-39-25	India	India
SAC0955	S. spontaneum (India)	IND 81-43	WD1-SC-39-26	India	India Tamil Nadu
SAC0956	S. spontaneum (India)	IND 81-55	WD1-SC-39-27	India	India Tamil Nadu
SAC0957	S. spontaneum (India)	IND 81-074	WD1-SC-39-29	India	India Tamil Nadu
SAC0958	S. spontaneum (India)	IND 81-81	WD1-SC-39-30	India	India Tamil Nadu
SAC0959	S. spontaneum (India)	IND 81-86	WD1-SC-39-32	India	India Tamil Nadu
SAC0960	S. spontaneum (India)	IND-81-101	WD1-SC-39-33	India	India Tamil Nadu
SAC0961	S. spontaneum (India)	IND-81-119	WD1-SC-39-34	India	India Tamil Nadu
SAC0962	S. spontaneum (India)	IND 81-122	WD1-SC-39-35	India	India
SAC0963	S. spontaneum (India)	IND. 81-132	WD1-SC-39-37	Unknown	Unknown
SAC0964	S. spontaneum (India)	IND 81-136	WD1-SC-39-38	Unknown	Unknown
SAC0965	S. spontaneum (India)	IND-81-138	WD1-SC-39-39	India	India Tamil Nadu
SAC0966	S. spontaneum (India)	IND 81-143	WD1-SC-39-40	Unknown	Unknown
SAC0967	S. spontaneum (India)	IND-81-164	WD1-SC-39-44	India	India Tamil Nadu
SAC0969	S. spontaneum (India)	IND-81-180	WD1-SC-39-48	India	India Tamil Nadu
SAC0970	S. spontaneum (India)	IND 81-191	WD1-SC-39-49	Unknown	Unknown
SAC0971	S. spontaneum (India)	IND. 82-318	WD1-SC-39-53	Unknown	Unknown
SAC0993	S. spontaneum (India)	S. spont # 02	WD1-SC-39-98	Unknown	Unknown
SAC0995	S. spontaneum (India)	S. spont # 17	WD1-SC-39-103	Unknown	Unknown
SAC0996	S. spontaneum (India)	S. spont # 27	WD1-SC-39-108	Unknown	Unknown
SAC0998	S. spontaneum (India)	S. spont # 30	WD1-SC-39-110	Unknown	Unknown
SAC1001	S. spontaneum (India)	SES 184B	WD1-SC-39-119	India	India
SAC1002	S. spontaneum (India)	SES 196	WD1-SC-39-120	Brazil	Brazil
SAC1003	S. spontaneum (India)	SES 208	WD1-SC-39-121	India	India
SAC1004	S. spontaneum (India)	SES 231	WD1-SC-39-122	India	India
SAC1010	S. spontaneum (India)	SES 606	WD1-SC-39-136	India	India
SAC1011	S. spontaneum (India)	SES 084/58	WD1-SC-39-137	India	India Tamil Nadu
SAC1017	S. spontaneum (India)	THA 83-149	WD1-SC-39-147	Unknown	Unknown
SAC1025	S. spontaneum (India)	US 60-0004-004; -06	WD1-SC-39-159	Afghanistan	Afghanistan
SAC1027	S. spontaneum (India)	US 78-506	WD1-SC-39-161	Pakistan	Pakistan North-west Frontier
SAC1028	S. spontaneum (India)	US 78-511	WD1-SC-39-163	Pakistan	Pakistan
SAC1035	S. spontaneum (India)	SES 147B	WD1-SC-39-173	India	India
SAC1036	S. spontaneum (India)	SES 205A	WD1-SC-39-174	India	India
SAC1044	S. spontaneum (India)	IK 76-006	WD1-SC-41-13	Indonesia	Indonesia
SAC1058	S. spontaneum (India)	IN84-091	WD1-SC-41-46	Indonesia	Indonesia
SAC1062	S. spontaneum (India)	IND-81-142	WD1-SC-41-51	India	India Tamil Nadu
SAC1063	S. spontaneum (India)	IND 81-144	WD1-SC-41-52	Unknown	Unknown
SAC1072	S. spontaneum (India)	IS 76-154	WD1-SC-41-64	US	California United States
SAC1102	S. spontaneum (India)	S 01	WD1-SC-41-114	Bangladesh	Bangladesh
SAC1108	S. spontaneum (India)	SES 014	WD1-SC-41-125	India	India
SAC1110	S. spontaneum (India)	SES 033	WD1-SC-41-128	India	India Tamil Nadu
SAC1111	S. spontaneum (India)	SES 060	WD1-SC-41-129	India	India
SAC1112	S. spontaneum (India)	SES 080B	WD1-SC-41-133	India	India Tamil Nadu
SAC1119	S. spontaneum (India)	Spont10	WD1-SC-41-151	Iran	Iran
SAC1120	S. spontaneum (India)	Longchuan (Yunan)	WD1-SC-41-156	China	China
SAC1123	S. spontaneum (India)	SES 316	WD1-SC-41-162	India	India Tamil Nadu
SAC1126	S. spontaneum (India)	IND. 82-257	WD1-SC-41-175	India	India
SAC1128	S. spontaneum (India)	SLC.92-62	WD1-SC-41-178	Sri Lanka	Sri Lanka
SAC1129	S. spontaneum (India)	SLC.92-32	WD1-SC-41-179	Sri Lanka	Sri Lanka
SAC1130	S. spontaneum (India)	SES 234	WD1-SC-41-182	Malaysia	Malaysia
SAC1202	S. spontaneum (India)	IND. 81-198	WD1-SC-43-109	India	India
SAC1211	S. spontaneum (India)	SES 234	WD1-SC-43-121	Malaysia	Malaysia
SAC1214	S. spontaneum (India)	IN84-016	WD1-SC-43-124	Indonesia	Indonesia
SAC1232	S. spontaneum (India)	SLC.92-82	WD1-SC-43-169	Sri Lanka	Sri Lanka
SAC1235	S. spontaneum (India)	SLC.92-85	WD1-SC-43-179	Sri Lanka	Sri Lanka
SAC1237	S. spontaneum (India)	SES 084/58	WD1-SC-45-01	India	India Tamil Nadu
SAC1238	S. spontaneum (India)	SES 088 C	WD1-SC-45-02	India	India
SAC1239	S. spontaneum (India)	SES 090	WD1-SC-45-03	India	India
SAC1240	S. spontaneum (India)	SES 092	WD1-SC-45-04	India	India
SAC1241	S. spontaneum (India)	SES 103	WD1-SC-45-05	India	India Tamil Nadu
SAC1244	S. spontaneum (India)	SES 135	WD1-SC-45-08	India	India Tamil Nadu
SAC1245	S. spontaneum (India)	SES 178	WD1-SC-45-09	India	India
SAC1246	S. spontaneum (India)	SES 197 B	WD1-SC-45-10	India	India
SAC1247	S. spontaneum (India)	SES 220	WD1-SC-45-11	India	India
SAC1250	S. spontaneum (India)	SES 260	WD1-SC-45-16	India	India
SAC1252	S. spontaneum (India)	SES 270	WD1-SC-45-18	India	India
SAC1256	S. spontaneum (India)	SES 294	WD1-SC-45-22	India	India
SAC1257	S. spontaneum (India)	SES 297A	WD1-SC-45-23	India	India
SAC1258	S. spontaneum (India)	SES 297B	WD1-SC-45-24	India	India
SAC1259	S. spontaneum (India)	SES 323	WD1-SC-45-25	India	India
SAC1262	S. spontaneum (India)	SES 367	WD1-SC-45-29	India	India
SAC1263	S. spontaneum (India)	SES 275	WD1-SC-45-30	India	India
SAC1273	S. spontaneum (India)	S. spont # 22	WD1-SC-45-45	Malaysia	Malaysia
SAC1282	S. spontaneum (India)	UM 69-015	WD1-SC-45-67	Malaysia	Malaysia
SAC1286	S. spontaneum (India)	US 4625	WD1-SC-45-75	Kenya	Kenya
SAC1287	S. spontaneum (India)	US 4633	WD1-SC-45-76	Kenya	Kenya
SAC1302	S. spontaneum (India)	US 78-510	WD1-SC-45-103	Pakistan	Pakistan
SAC1308	S. spontaneum (India)	US 78-523	WD1-SC-45-114	Pakistan	Pakistan
SAC1309	S. spontaneum (India)	US 78-526	WD1-SC-45-115	Pakistan	Pakistan
SAC207	S. spontaneum (India)	Ind 81-082	WD1-SC-39-31	India	India Tamil Nadu
SAC208	S. spontaneum (India)	Ind 81-157	WD1-SC-39-43	India	India Tamil Nadu
SAC209	S. spontaneum (India)	Ind 82-241	WD1-SC-39-51	India	India
SAC212	S. spontaneum (India)	S. spont # 22	WD1-SC-39-106	Unknown	Unknown
SAC217	S. spontaneum (India)	Ses 390	WD1-SC-39-130	India	India
SAC219	S. spontaneum (India)	US 78-508	WD1-SC-39-162	Pakistan	Pakistan North-west Frontier
SAC233	S. spontaneum (India)	SES 066	WD1-SC-41-130	India	India
SAC235	S. spontaneum (India)	SES 011	WD1-SC-41-171	India	India
SAC243	S. spontaneum (India)	Ses 208 (India)	WD1-SC-43-128	India	India
SAC275	S. spontaneum (India)	SES-006 (India)	WD1-SC-41-123	India	India
SAC282	S. spontaneum (India)	Unk (2009) (India)	WD1-SC-45-46	Unknown	Unknown

## Sheet: Table S8
Table S8. Inferred species membership for 175 accessions with missing information on species name
					Coefficient of Assignment Test
Sample Code	Name	Location	Source	S. robustum	S. sinense	S. barberi	S. spontaneum	S. officinarum	Recorded Species	Identified species
SAC0332	IK 76-77	WD1-SC-04-14	Unknown	0.002	0.05	0.001	0.944	0.003	unknown	S. spontaneum
SAC0335	CRISTAFINA	WD1-SC-04-21	Unknown	0.221	0.001	0.001	0.001	0.776	unknown	S. officinarum_S. robustum
SAC0350	UNKNOWN #1	WD1-SC-05-25	Unknown	0.004	0.001	0.002	0.003	0.99	unknown	S. officinarum
SAC0351	UNKNOWN	WD1-SC-05-29	Unknown	0.488	0.002	0.001	0.49	0.019	unknown	S. robustum_S. spontaneum
SAC0374	UNKNOWN (1995: R43-P023)	WD1-SC-07-22	Unknown	0.239	0.002	0.003	0	0.756	unknown	S. officinarum_S. robustum
SAC0375	UNKNOWN (1995: R45-P078)	WD1-SC-07-26	Unknown	0.002	0.001	0.001	0.001	0.996	unknown	S. officinarum
SAC0376	UNKNOWN (1995: R45-P109)	WD1-SC-07-27	Unknown	0.034	0.001	0.002	0.001	0.961	unknown	S. officinarum
SAC0377	UNKNOWN (1995: R45-P123)	WD1-SC-07-30	Unknown	0.046	0.002	0.064	0.003	0.886	unknown	S. officinarum
SAC0378	UNKNOWN (1995: R45-P126)	WD1-SC-07-31	Unknown	0.002	0.995	0.002	0.001	0.001	unknown	S. sinense
SAC0379	UNKNOWN (1995: R56-P24)	WD1-SC-07-32	Unknown	0.002	0.001	0.004	0.002	0.991	unknown	S. officinarum
SAC0380	UNKNOWN (1995: R56-P50)	WD1-SC-07-33	Unknown	0.003	0.001	0.005	0.002	0.989	unknown	S. officinarum
SAC0381	UNKNOWN ROW 37 POINT 55	WD1-SC-07-35	Unknown	0.001	0.001	0.002	0.012	0.985	unknown	S. officinarum
SAC0382	21 NG3 (SEED)	WD1-SC-08-01	Unknown	0.928	0.001	0.003	0.001	0.067	unknown	S. robustum
SAC0386	MEXICAN STRIPED (SEEDLING)	WD1-SC-08-06	Unknown	0.974	0.002	0.011	0.001	0.012	unknown	S. robustum
SAC0388	21 NG 17	WD1-SC-08-11	Panama	0.006	0.001	0.002	0.001	0.99	unknown	S. officinarum
SAC0390	UNKNOWN	WD1-SC-08-13	Unknown	0.035	0.002	0.002	0.001	0.96	unknown	S. officinarum
SAC0397	UNKNOWN 45-88	WD1-SC-08-33	Unknown	0.348	0.258	0.004	0.322	0.067	unknown	S. robustum_S. sinense_S. spontaneum
SAC0398	UNKNOWN ROW 65 POINT 10	WD1-SC-08-34	Unknown	0.002	0.002	0.009	0.002	0.986	unknown	S. officinarum
SAC0399	UNKNOWN ROW 57 POINT 58	WD1-SC-08-36	Unknown	0.003	0	0.008	0.158	0.831	unknown	S. officinarum
SAC0402	UNKNOWN	WD1-SC-09-03	Unknown	0.249	0.018	0.002	0.002	0.729	unknown	S. officinarum_S. robustum
SAC0403	UNKNOWN	WD1-SC-09-04	Unknown	0.251	0.01	0.002	0.002	0.735	unknown	S. officinarum_S. robustum
SAC0404	UNKNOWN (1995) R 59 P 33	WD1-SC-09-05	Unknown	0.002	0	0.001	0	0.997	unknown	S. officinarum
SAC0411	UNKNOWN 45-60 TRELLIS	WD1-SC-09-18	Unknown	0.048	0.008	0.066	0.194	0.684	unknown	S. officinarum_S. spontaneum
SAC0412	UNKNOWN 45-66	WD1-SC-09-26	Unknown	0.004	0.001	0.033	0.047	0.915	unknown	S. officinarum
SAC0413	MOL 6073	WD1-SC-09-27	US	0.967	0	0.02	0.013	0	unknown	S. robustum
SAC0433	DUPARI	WD1-SC-11-06	Unknown	0.001	0.001	0.001	0.001	0.996	unknown	S. officinarum
SAC0435	CP 91-555	WD1-SC-11-08	US	0.001	0.997	0	0	0.001	unknown	S. sinense
SAC0442	IJ 76-236	WD1-SC-11-18	Unknown	0.416	0.008	0.015	0.382	0.179	unknown	S. robustum_S. spontaneum_S. officinarum
SAC0448	TOBOE SALAK TOEWA	WD1-SC-11-35	Brazil	0.999	0	0	0	0	unknown	S. robustum
SAC0466	CG 97-100	WD1-SC-12-36	Guatemala	0.003	0.002	0.001	0.001	0.994	unknown	S. officinarum
SAC0473	UNKNOWN (1995: R65-P25)	WD1-SC-13-07	Unknown	0.002	0	0.001	0.001	0.996	unknown	S. officinarum
SAC0475	UNKNOWN (1995: R37-PO46)	WD1-SC-13-10	Unknown	0.001	0.997	0	0.001	0	unknown	S. sinense
SAC0476	UNKNOWN	WD1-SC-13-11	Unknown	0.415	0.007	0.073	0.384	0.121	unknown	S. robustum_S. spontaneum_S. officinarum
SAC0482	UNKNOWN 43-167	WD1-SC-13-21	Unknown	0.025	0.001	0.001	0.001	0.971	unknown	S. officinarum
SAC0484	CP R1 X P1	WD1-SC-13-22Anorth	Unknown	0.002	0.001	0.001	0.001	0.995	unknown	S. officinarum
SAC0487	CPCL 99-1401	WD1-SC-13-27	Unknown	0.003	0.001	0.001	0.003	0.992	unknown	S. officinarum
SAC0488	CP 45-1198	WD1-SC-13-28	Unknown	0.005	0	0.001	0.003	0.991	unknown	S. officinarum
SAC0493	KT 730	WD1-SC-14-03	US	0.021	0.025	0.039	0.419	0.496	unknown	S. officinarum_S. spontaneum
SAC0495	UBA IPORANGA	WD1-SC-14-05	Brazil	0.001	0.997	0.001	0.001	0	unknown	S. sinense
SAC0496	UNKNOWN (1995: R65-P41)	WD1-SC-14-06	Unknown	0.001	0.997	0.001	0.001	0	unknown	S. sinense
SAC0497	MOL 6446	WD1-SC-14-08	US	0.024	0.022	0.094	0.399	0.46	unknown	S. officinarum_S. spontaneum
SAC0498	UNKNOWN (1995: R65-P47)	WD1-SC-14-09	Unknown	0.002	0.001	0.038	0.051	0.908	unknown	S. officinarum
SAC0499	UNKNOWN (1995: R65-P57)	WD1-SC-14-13	Unknown	0.323	0.257	0.003	0.308	0.108	unknown	S. robustum_S. spontaneum_S. officinarum
SAC0500	UNKNOWN (1995: R34-P16)	WD1-SC-14-15	Unknown	0.008	0.062	0.019	0.5	0.411	unknown	S. spontaneum_S. officinarum
SAC0502	B 69691	WD1-SC-14-19	Unknown	0.04	0.01	0.073	0.184	0.693	unknown	S. officinarum_S. spontaneum
SAC0503	B 70713	WD1-SC-14-20	Unknown	0.477	0.072	0.092	0.32	0.039	unknown	S. robustum_S. spontaneum
SAC0504	B 73348	WD1-SC-14-21	Unknown	0.477	0.099	0.005	0.41	0.009	unknown	S. robustum_S. spontaneum
SAC0506	CO 0727	WD1-SC-14-24	Unknown	0.021	0.001	0.002	0.001	0.975	unknown	S. officinarum
SAC0507	CP 73-1547	WD1-SC-14-26	US	0.056	0.002	0.096	0.245	0.601	unknown	S. officinarum_S. spontaneum
SAC0509	CP 91-555	WD1-SC-14-30	US	0.011	0.001	0.002	0.005	0.981	unknown	S. officinarum
SAC0520	US 95-1024	WD1-SC-15-22	Unknown	0.001	0.001	0.012	0.004	0.981	unknown	S. officinarum
SAC0521	MOL 6125	WD1-SC-15-23	US	0.467	0.026	0.004	0.025	0.477	unknown	S. officinarum_S. robustum
SAC0522	N 26-14	WD1-SC-15-25	Unknown	0.028	0.005	0.006	0.408	0.553	unknown	S. officinarum_S. spontaneum
SAC0523	F31-762	WD1-SC-15-26	US	0.002	0	0.002	0.001	0.994	unknown	S. officinarum
SAC0524	F 31-436	WD1-SC-15-27	Unknown	0.002	0.001	0.001	0.002	0.995	unknown	S. officinarum
SAC0525	H 87-4319	WD1-SC-15-28	Unknown	0.014	0.002	0.001	0.001	0.983	unknown	S. officinarum
SAC0527	F 177	WD1-SC-15-30	Taiwan	0.007	0.081	0.004	0.022	0.886	unknown	S. officinarum
SAC0530	UNKNOWN 68-21 (765)	WD1-SC-16-04	Unknown	0.018	0.03	0.063	0.408	0.482	unknown	S. officinarum_S. spontaneum
SAC0535	UNKNOWN POINT 22 35	WD1-SC-16-10	Unknown	0.004	0.001	0.001	0.011	0.983	unknown	S. officinarum
SAC0537	UNKNOWN	WD1-SC-16-16	Unknown	0.318	0.001	0.001	0.001	0.68	unknown	S. officinarum_S. robustum
SAC0548	NG 77-083	WD1-SC-16-32	Brazil	0.997	0.001	0.001	0	0	unknown	S. robustum
SAC0551	MOL 6427	WD1-SC-17-05	US	0.018	0.041	0.035	0.416	0.491	unknown	S. officinarum_S. spontaneum
SAC0552	CP 01-1372	WD1-SC-17-11	US	0.01	0.001	0.002	0.001	0.986	unknown	S. officinarum
SAC0553	CP 01-1372	LH	US	0.007	0.001	0.002	0.002	0.989	unknown	S. officinarum
SAC0554	CP 00-1446	WD1-SC-17-13	US	0.003	0.001	0.002	0.002	0.992	unknown	S. officinarum
SAC0555	CP 92-1666	WD1-SC-17-14	US	0.005	0.002	0.004	0.015	0.974	unknown	S. officinarum
SAC0557	PR 75138	WD1-SC-17-19	Unknown	0.001	0.001	0.001	0.006	0.99	unknown	S. officinarum
SAC0558	NG 26-011	WD1-SC-17-20	Unknown	0.011	0.018	0.023	0.304	0.645	unknown	S. officinarum_S. spontaneum
SAC0559	UNKNOWN	WD1-SC-17-22	Unknown	0.002	0.001	0.001	0.002	0.994	unknown	S. officinarum
SAC0562	UNKNOWN	WD1-SC-17-29	Unknown	0.001	0	0.001	0.001	0.997	unknown	S. officinarum
SAC0563	UNKNOWN 1995 R65-P38	WD1-SC-17-31	Unknown	0.001	0.997	0.001	0.001	0	unknown	S. sinense
SAC0564	UNKNOWN 1995 R55 P36	WD1-SC-17-32	Unknown	0.001	0.997	0.001	0.001	0	unknown	S. sinense
SAC0565	UNKNOWN	WD1-SC-17-33	Unknown	0.001	0.997	0.001	0.001	0.001	unknown	S. sinense
SAC0566	UNKNOWN 1995 R 65 P34	WD1-SC-17-34	Unknown	0.144	0.001	0.324	0.268	0.262	unknown	S. barberi_S. spontaneum_S. officinarum_S. robustum
SAC0567	UNKNOWN 1995 R37 P042	WD1-SC-17-35	Unknown	0.17	0.001	0.305	0.268	0.255	unknown	S. barberi_S. spontaneum_S. officinarum_S. robustum
SAC0569	MOL 6427	WD1-SC-18-03	US	0.016	0.019	0.09	0.412	0.463	unknown	S. officinarum_S. spontaneum
SAC0570	ISD 20	WD1-SC-18-04	Bangladesh	0.003	0	0.001	0.002	0.994	unknown	S. officinarum
SAC0571	RF 84-106	WD1-SC-18-05	Japan	0.007	0.045	0.007	0.01	0.93	unknown	S. officinarum
SAC0572	ISD 28	WD1-SC-18-06	Bangladesh	0.003	0.001	0.002	0.206	0.789	unknown	S. officinarum_S. spontaneum
SAC0573	ISD 24	WD1-SC-18-07	Bangladesh	0.013	0.001	0.002	0.003	0.981	unknown	S. officinarum
SAC0574	CP 98-1029	WD1-SC-18-09	US	0.007	0.001	0.002	0.002	0.989	unknown	S. officinarum
SAC0575	RHEQ	WD1-SC-18-10	Unknown	0.002	0.995	0.002	0.001	0	unknown	S. sinense
SAC0576	ISD 25	WD1-SC-18-11	Bangladesh	0.009	0.006	0.007	0.01	0.968	unknown	S. officinarum
SAC0578	MEX 85-6196	WD1-SC-18-13	Mexico	0.009	0	0.001	0.003	0.987	unknown	S. officinarum
SAC0579	IM 76-249	WD1-SC-18-18	Brazil	0.013	0.007	0.496	0.147	0.338	unknown	S. spontaneum_S. officinarum
SAC0586	7628	WD1-SC-19-05	Unknown	0.388	0.001	0.001	0.609	0.002	unknown	S. robustum_S. spontaneum
SAC0587	CP 01-1372	WD1-SC-19-09	US	0.002	0.004	0.001	0.01	0.983	unknown	S. officinarum
SAC0589	CP 94-0150	WD1-SC-19-12	Unknown	0.015	0.001	0.001	0.001	0.982	unknown	S. officinarum
SAC0590	L 03-371	WD1-SC-19-13	US	0.003	0.003	0.003	0.097	0.893	unknown	S. officinarum
SAC0592	CRIANA	WD1-SC-19-17	Unknown	0.004	0.001	0.002	0.375	0.618	unknown	S. officinarum_S. spontaneum
SAC0597	CPSG-3481	WD1-SC-19-27	Pakistan	0.101	0.002	0.121	0.107	0.67	unknown	S. officinarum_S. robustum_S. barberi_S. spontaneum
SAC0603	B35-9	WD1-SC-20-01	Unknown	0.005	0.001	0.002	0.003	0.989	unknown	S. officinarum
SAC0604	DB 58661	WD1-SC-20-03	Unknown	0.003	0.001	0.001	0	0.994	unknown	S. officinarum
SAC0606	F-159	WD1-SC-20-05	Unknown	0.01	0.001	0.003	0.001	0.985	unknown	S. officinarum
SAC0607	UNKNOWN	WD1-SC-20-07	Unknown	0.274	0.001	0.001	0.002	0.723	unknown	S. officinarum_S. robustum
SAC0608	F31-762	WD1-SC-20-08	US	0.002	0.001	0.001	0.002	0.995	unknown	S. officinarum
SAC0611	R567	WD1-SC-20-12	Unknown	0.039	0.001	0.003	0.001	0.955	unknown	S. officinarum
SAC0612	KAYANA 10	WD1-SC-20-14	Unknown	0.001	0	0.997	0.001	0	unknown	S. barberi
SAC0617	UNKNOWN 71-20	WD1-SC-20-24	Unknown	0.002	0.997	0.001	0.001	0	unknown	S. sinense
SAC0618	MORTHI	WD1-SC-20-25	Unknown	0.003	0	0.993	0.002	0.002	unknown	S. barberi
SAC0624	POJ028	WD1-SC-20-33	Unknown	0.999	0	0	0	0	unknown	S. robustum
SAC0626	UNKNOWN 1995: R43 PO25	WD1-SC-21-01	Unknown	0.002	0.001	0.003	0.002	0.993	unknown	S. officinarum
SAC0641	UNKNOWN	WD1-SC-21-34	Unknown	0.003	0.001	0.001	0.002	0.993	unknown	S. officinarum
SAC0642	UNKNOWN 1995: R65 P25	WD1-SC-21-35	Unknown	0.002	0	0.001	0.001	0.995	unknown	S. officinarum
SAC0643	TCP 93-4245	WD1-SC-21-36	US	0.004	0.002	0.076	0.002	0.916	unknown	S. officinarum
SAC0644	7628	WD1-SC-21-37	Unknown	0.416	0.001	0.001	0.581	0.002	unknown	S. robustum_S. spontaneum
SAC0645	DON CICO	WD1-SC-21-38	Unknown	0.127	0.001	0.001	0.001	0.869	unknown	S. officinarum
SAC0652	UNKNOWN (1995: R65-P38)	WD1-SC-22-23	Unknown	0.179	0.819	0.001	0	0.001	unknown	S. sinense
SAC0653	CP 91-555	GH (T14)	US	0.003	0.001	0.001	0.001	0.994	unknown	S. officinarum
SAC0654	UNKNOWN R 56 P 28	WD1-SC-22-33	Unknown	0.046	0.002	0.001	0.02	0.931	unknown	S. officinarum
SAC0666	DB 420/60	LH 1 (T5)	Unknown	0.006	0.001	0.001	0.001	0.99	unknown	S. officinarum
SAC0669	TCP 87-3388	LH 1 (T3)	US	0.002	0.003	0.005	0.02	0.971	unknown	S. officinarum
SAC0679	BS 3058/BSN 3058	GH 1 (T18)	Unknown	0.028	0.001	0.002	0.001	0.969	unknown	S. officinarum
SAC0685	Ragnar	GH 2 (T21)	Unknown	0.039	0	0.001	0.004	0.957	unknown	S. officinarum
SAC0693	CP 91-055	GH 3 (R20) (WD1-SC-22-34 - dead)	Unknown	0.007	0.001	0.001	0.005	0.986	unknown	S. officinarum
SAC0696	M 2350/79	GH 3 (T22)	Unknown	0.002	0.001	0.003	0.004	0.99	unknown	S. officinarum
SAC0703	HoCp 96-540	LH 1 (T3)	Unknown	0.003	0.001	0.016	0.029	0.951	unknown	S. officinarum
SAC0706	F 31-762	LH 1 (T3)	Unknown	0.001	0.001	0.001	0.001	0.996	unknown	S. officinarum
SAC0716	BALL 569	FSN	Unknown	0.038	0.002	0.002	0.001	0.957	unknown	S. officinarum
SAC0733	CO 6304	LH 3 (T3)	Unknown	0.002	0.001	0.001	0.002	0.994	unknown	S. officinarum
SAC0737	HoCp 85-845	LH 3 (T6)	Unknown	0.006	0.001	0.002	0.001	0.99	unknown	S. officinarum
SAC0742	ISD 31	FSN 1 (R12)	Unknown	0.005	0.001	0.003	0.247	0.744	unknown	S. officinarum_S. spontaneum
SAC0743	CO 6502	FSN 1 (R12)	Unknown	0.002	0.001	0.001	0.002	0.994	unknown	S. officinarum
SAC0748	Q 5-457	FSN 1 (R7)	Unknown	0.005	0.001	0.001	0.001	0.992	unknown	S. officinarum
SAC0758	F 31-407	FSN 2 (R8)	Unknown	0.139	0.001	0.001	0.001	0.859	unknown	S. officinarum
SAC0762	IJ 76-426	FSN 3 (R10)	Unknown	0.047	0.002	0.002	0.001	0.947	unknown	S. officinarum
SAC0767	US 67-037-01	FSN 3 (R4)	US	0.007	0.001	0.002	0.406	0.584	unknown	S. officinarum_S. spontaneum
SAC0769	RSB 90-22	FSN 3 (R8)	Unknown	0.007	0.001	0.001	0.001	0.99	unknown	S. officinarum
SAC0794	CPGN 84-2-9678	WD1-SC-37-37	Pakistan	0.001	0.005	0.001	0.993	0.001	unknown	S. spontaneum
SAC0870	US 56-15-1	WD1-SC-37-108	Pakistan	0.001	0.002	0.002	0.994	0.001	unknown	S. spontaneum
SAC0871	Sing 80	WD1-SC-37-109	Unknown	0.001	0.007	0.001	0.989	0.001	unknown	S. spontaneum
SAC097	Cana Gorda	WD1-SC-01-27	Unknown	0.077	0.001	0.001	0.004	0.917	unknown	S. officinarum
SAC099	Tall Ribbon	WD1-SC-01-34	Unknown	0.001	0.001	0.001	0.002	0.996	unknown	S. officinarum
SAC1005	SES 269	WD1-SC-39-123	India	0.007	0	0.003	0.988	0.001	unknown	S. spontaneum
SAC105	Us 84-1003	WD1-SC-02-18	Unknown	0.002	0.001	0.003	0.619	0.374	unknown	S. spontaneum_S. officinarum
SAC106	Mex 57-1285	WD1-SC-02-20	Mexico	0.002	0.001	0.002	0.002	0.994	unknown	S. officinarum
SAC1118	SM 8136	WD1-SC-41-150	Unknown	0.14	0.021	0.017	0.586	0.236	unknown	S. robustum_S. spontaneum_S. officinarum
SAC1125	THA 83-14	WD1-SC-41-173	Unknown	0.001	0.08	0.001	0.915	0.002	unknown	S. spontaneum
SAC1131	IA 3135	WD1-SC-41-183	Unknown	0.002	0.028	0.057	0.35	0.562	unknown	S. officinarum_S. spontaneum
SAC114	Vanessa	WD1-SC-03-25	Unknown	0.002	0	0.004	0.368	0.626	unknown	S. officinarum_S. spontaneum
SAC118	Kalaloa 2	WD1-SC-05-14	US	0.002	0.128	0.001	0.243	0.626	unknown	S. officinarum_S. spontaneum
SAC1213	US 56-001-043	WD1-SC-43-123	Unknown	0.001	0.005	0.001	0.993	0	unknown	S. spontaneum
SAC1225	Q 6947108	WD1-SC-43-151	Unknown	0.001	0.003	0.002	0.994	0.001	unknown	S. spontaneum
SAC1229	MPTh 97-3	WD1-SC-43-163	Thailand	0.002	0.004	0.002	0.564	0.428	unknown	S. spontaneum_S. officinarum
SAC132	Ia 3107	WD1-SC-08-26	Unknown	0.002	0.031	0.035	0.368	0.565	unknown	S. officinarum_S. spontaneum
SAC133	Unk R39 P49	WD1-SC-08-30	Unknown	0.999	0	0	0	0	unknown	S. robustum
SAC134	96 Ng-16	WD1-SC-08-35	Panama	0.996	0.001	0.001	0.001	0.001	unknown	S. robustum
SAC135	Cg 96-01	WD1-SC-09-08	Guatemala	0.037	0.001	0.001	0.002	0.96	unknown	S. officinarum
SAC141	T 4594443	WD1-SC-10-21	Unknown	0.998	0	0	0	0	unknown	S. robustum
SAC143	Im 76-236	WD1-SC-10-27	Unknown	0.381	0.002	0.028	0.355	0.233	unknown	S. robustum_S. spontaneum_S. officinarum
SAC144	Ng 84-045	WD1-SC-10-29	Unknown	0.432	0.002	0.096	0.366	0.104	unknown	S. robustum_S. spontaneum_S. officinarum
SAC147	Bs-3058	WD1-SC-11-20	Unknown	0.018	0.001	0.002	0.001	0.977	unknown	S. officinarum
SAC148	Ng 76-558	WD1-SC-11-21	Unknown	0.001	0.118	0.001	0.252	0.627	unknown	S. officinarum_S. spontaneum
SAC153	Isd 2-54	WD1-SC-11-28	Bangladesh	0.012	0.003	0.022	0.01	0.953	unknown	S. officinarum
SAC154	Isd 29	WD1-SC-11-31	Bangladesh	0.002	0	0.001	0.002	0.995	unknown	S. officinarum
SAC158	Hm 661	WD1-SC-12-06	Unknown	0.59	0.002	0.001	0.001	0.406	unknown	S. robustum_S. officinarum
SAC160	43-100	WD1-SC-12-18	Unknown	0.012	0.003	0.006	0.146	0.832	unknown	S. officinarum
SAC161	43-188	WD1-SC-12-19	Unknown	0.003	0.035	0.002	0.098	0.862	unknown	S. officinarum
SAC162	45-64	WD1-SC-12-20	Unknown	0.002	0.001	0.001	0.005	0.991	unknown	S. officinarum
SAC165	R 45 Pt 107	WD1-SC-13-22	Unknown	0.002	0.001	0.001	0.003	0.993	unknown	S. officinarum
SAC168	Unknown (1995- R65-P50)	WD1-SC-14-10	Unknown	0.005	0.002	0.002	0.002	0.99	unknown	S. officinarum
SAC170	Unknown (1995- R65-P58)	WD1-SC-14-14	Unknown	0.413	0.583	0.003	0.001	0	unknown	S. sinense_S. robustum
SAC176	N 26-14	WD1-SC-15-24	Unknown	0.011	0.001	0.002	0.003	0.982	unknown	S. officinarum
SAC177	F 159	WD1-SC-15-31	Unknown	0.008	0.001	0.002	0.004	0.985	unknown	S. officinarum
SAC180	Unknown	WD1-SC-16-12	Unknown	0.09	0.189	0.002	0.016	0.703	unknown	S. officinarum_S. sinense
SAC183	Cp 88-1762	WD1-SC-17-21	US	0.001	0.004	0.053	0.012	0.929	unknown	S. officinarum
SAC185	Cpsg-437	WD1-SC-18-20	Pakistan	0.009	0.001	0.002	0.003	0.986	unknown	S. officinarum
SAC198	Unknown (1995- R65-P35)	WD1-SC-22-25	Unknown	0.001	0.997	0.001	0.001	0	unknown	S. sinense
SAC202	Unknown (2009- R37-P056)	WD1-SC-37-56	Unknown	0.009	0	0.005	0.985	0.001	unknown	S. spontaneum
SAC204		WD1-SC-37-67	Unknown	0.001	0.002	0.002	0.994	0.001	unknown	S. spontaneum
SAC220	Taiwan 120	WD1-SC-39-175	Brazil	0.002	0.013	0.003	0.981	0.001	unknown	S. spontaneum
SAC224		WD1-SC-41-34	Unknown	0.003	0.001	0.001	0.994	0.001	unknown	S. spontaneum
SAC254	Cp-91-055	WD1-SC-22-34	Unknown	0.011	0.001	0.001	0.006	0.981	unknown	S. officinarum
SAC268	NG 57-053	lath house	Papua New Guinea	0.996	0.002	0.001	0	0.001	unknown	S. robustum
SAC286	Cp 94-0150	WD1-SC-19-11	Unknown	0.013	0.001	0.001	0.003	0.982	unknown	S. officinarum

## Sheet: Table S9
Table S9. Inferred parentage of 123 hybrid clones in the WCSRG
						Coefficient of Assignment Test
Sample code	Species	Name	Location	Origin	S. robustum	S. sinense	S. barberi	S. spontaneum	S. officinarum	Inferred parentage
SAC0112	hybrid	R 469	WD1-SC-03-15	Guadeloupe	0.002	0.001	0.004	0.002	0.99	S. officinarum
SAC0123	hybrid	Phil 6607	WD1-SC-06-15	Philippines	0.001	0.001	0.003	0.022	0.972	S. officinarum
SAC0124	hybrid	Cg04-0587	WD1-SC-06-24	Guatemala	0.01	0.002	0.002	0.055	0.931	S. officinarum
SAC0127	hybrid	Cg04-15398	WD1-SC-07-25	Guatemala	0.064	0.002	0.068	0.001	0.863	S. officinarum
SAC0136	hybrid	Cr00026	WD1-SC-09-13	Dominican Republic	0.002	0.004	0.001	0.005	0.987	S. officinarum
SAC0137	hybrid	F 154	WD1-SC-09-14	Taiwan	0.003	0.004	0.002	0.006	0.985	S. officinarum
SAC0150	hybrid	Co 419	WD1-SC-11-24	India	0.001	0.001	0.002	0.002	0.995	S. officinarum
SAC0151	hybrid	Co 313	WD1-SC-11-25	South Africa	0.001	0.001	0.002	0.412	0.585	S. officinarum_S. spontaneum
SAC0152	hybrid	Co 312	WD1-SC-11-26	South Africa	0.003	0.001	0.002	0.001	0.993	S. officinarum
SAC0155	hybrid	F 148	WD1-SC-12-02	Taiwan	0.149	0.013	0.014	0.001	0.823	S. officinarum
SAC0156	hybrid	F 160	WD1-SC-12-03	Taiwan	0.001	0.001	0.001	0.001	0.996	S. officinarum
SAC0157	hybrid	H 53-4596	WD1-SC-12-05	US	0.002	0.001	0.003	0.002	0.993	S. officinarum
SAC0159	hybrid	Nco 339	WD1-SC-12-15	South Africa	0.001	0.003	0.061	0.022	0.913	S. officinarum
SAC0181	hybrid	M 99/34	WD1-SC-16-22	Mauritius	0.323	0.001	0.012	0.003	0.661	S. officinarum_S. robustum
SAC0182	hybrid	Fiji 59	WD1-SC-17-03	Fiji	0.502	0.001	0.031	0.141	0.326	S. robustum_S. officinarum
SAC0189	hybrid	Cos 245	WD1-SC-21-22	India	0.001	0.001	0.002	0.002	0.994	S. officinarum
SAC0251	hybrid	Q 034	lath house	Australia	0.002	0.001	0.002	0.007	0.988	S. officinarum
SAC0263	hybrid	M 657/66	greenhouse	Mauritius	0.002	0.001	0.018	0.005	0.975	S. officinarum
SAC0267	hybrid	B 04362	greenhouse	Barbados	0.01	0.002	0.004	0.001	0.982	S. officinarum
SAC0274	hybrid	CO 1148	WD1-SC-21-21	India	0.001	0.001	0.002	0.002	0.994	S. officinarum
SAC0278	hybrid	Cg03-292	WD1-SC-19-29	Guatemala	0.001	0.002	0.06	0.027	0.909	S. officinarum
SAC0283	hybrid	Q 196	greenhouse	Unknown	0.019	0.002	0.002	0.004	0.973	S. officinarum
SAC0302	hybrid	BO 11	WD1-SC-01-28	India	0.003	0	0.002	0.001	0.993	S. officinarum
SAC0304	hybrid	POJ 0501	WD1-SC-01-36	Indonesia	0.068	0.193	0.002	0.016	0.721	S. officinarum_S. sinense
SAC0319	hybrid	US 67-22-2	WD1-SC-03-17	US	0.001	0	0.001	0	0.997	S. officinarum
SAC0337	hybrid	US 67-22-2	WD1-SC-04-24	US	0.001	0.001	0.003	0.376	0.619	S. officinarum_S. spontaneum
SAC0338	hybrid	N 37	WD1-SC-04-25	South Africa	0.001	0.002	0.002	0.001	0.993	S. officinarum
SAC0393	hybrid	CG 98-10	WD1-SC-08-20	Guatemala	0.003	0	0.002	0.002	0.993	S. officinarum
SAC0406	hybrid	H 83-6147	WD1-SC-09-07	US	0.01	0.001	0.002	0.001	0.987	S. officinarum
SAC0407	hybrid	US 67-22-2	WD1-SC-09-10N	US	0.001	0.001	0.004	0.369	0.624	S. officinarum_S. spontaneum
SAC0408	hybrid	US 67-22-2	WD1-SC-09-10S	US	0.002	0.001	0.003	0.378	0.616	S. officinarum_S. spontaneum
SAC0416	hybrid	FIJI 57	WD1-SC-09-32	Fiji	0.879	0.002	0.004	0.114	0.001	S. robustum
SAC0418	hybrid	CG02-163	WD1-SC-10-04	Guatemala	0.001	0.002	0.002	0.001	0.995	S. officinarum
SAC0428	hybrid	ZN 7	WD1-SC-10-22	South Africa	0.025	0.001	0.003	0.003	0.968	S. officinarum
SAC0431	hybrid	DI 52	WD1-SC-11-02	Indonesia	0.008	0.002	0.002	0.002	0.986	S. officinarum
SAC0432	hybrid	CP 89-2377	WD1-SC-11-04	US	0.002	0.001	0.002	0.001	0.993	S. officinarum
SAC0434	hybrid	CP 70-1527	WD1-SC-11-07	US	0.002	0.001	0.038	0.002	0.956	S. officinarum
SAC0437	hybrid	CP 44-0155	WD1-SC-11-13	US	0.002	0.001	0.003	0.004	0.99	S. officinarum
SAC0438	hybrid	CG 98-10	WD1-SC-11-14	Guatemala	0.003	0	0.002	0.002	0.993	S. officinarum
SAC0439	hybrid	CP 27-0139	WD1-SC-11-15	US	0.003	0.004	0.013	0.002	0.978	S. officinarum
SAC0440	hybrid	ZN 10	WD1-SC-11-16	Zimbabwe	0.004	0	0.002	0.002	0.992	S. officinarum
SAC0441	hybrid	COS 321	GH	India	0.002	0.001	0.001	0.004	0.992	S. officinarum
SAC0443	hybrid	CO 6806	WD1-SC-11-19	India	0.001	0.001	0.002	0.001	0.995	S. officinarum
SAC0445	hybrid	CO 213	WD1-SC-11-27	India	0.002	0.001	0.002	0.001	0.995	S. officinarum
SAC0450	hybrid	H 32-8560	WD1-SC-12-04	US	0.001	0.001	0.001	0.002	0.995	S. officinarum
SAC0452	hybrid	LCP 86-454	WD1-SC-12-08	US	0.001	0.001	0.014	0.007	0.977	S. officinarum
SAC0453	hybrid	FIJI 53	WD1-SC-12-11	Fiji	0.006	0.045	0.108	0.386	0.455	S. officinarum_S. spontaneum_S. barberi
SAC0455	hybrid	OGLES SELECTION	WD1-SC-12-14	South Africa	0.002	0.003	0.064	0.017	0.915	S. officinarum
SAC0456	hybrid	P 57-150-4	WD1-SC-12-16	Cuba	0.005	0.063	0.025	0.472	0.434	S. spontaneum_S. officinarum
SAC0457	hybrid	POJ 2753	WD1-SC-12-23	Indonesia	0.032	0.001	0.001	0.003	0.963	S. officinarum
SAC0459	hybrid	PR 0980	WD1-SC-12-25	Puerto Rico	0.003	0.001	0.001	0.001	0.995	S. officinarum
SAC0467	hybrid	D 158/41	WD1-SC-13-01	Guyana	0.111	0	0.001	0.003	0.884	S. officinarum
SAC0477	hybrid	PT 33-0085	WD1-SC-13-14	Guam	0.006	0.158	0.009	0.044	0.783	S. officinarum_S. sinense
SAC0508	hybrid	CP 89-2143	WD1-SC-14-29	US	0.004	0.002	0.008	0.018	0.967	S. officinarum
SAC0517	hybrid	CG04-0741	WD1-SC-15-18	Guatemala	0.001	0.001	0.002	0.001	0.995	S. officinarum
SAC0526	hybrid	CG04-19012	WD1-SC-15-29	Guatemala	0.001	0.001	0.001	0.001	0.996	S. officinarum
SAC0536	hybrid	CR 67400	WD1-SC-16-13	Unknown	0.002	0.004	0.002	0.005	0.988	S. officinarum
SAC0539	hybrid	M 093/48	WD1-SC-16-19	Mauritius	0.057	0.001	0.002	0.01	0.93	S. officinarum
SAC0540	hybrid	H 83-6147	WD1-SC-16-20	US	0.01	0.002	0.001	0.001	0.987	S. officinarum
SAC0541	hybrid	M 93/48	WD1-SC-16-21	Mauritius	0.197	0	0.001	0.001	0.801	S. officinarum
SAC0542	hybrid	CG04-09694	WD1-SC-16-23	Guatemala	0.006	0.101	0.005	0.002	0.886	S. officinarum
SAC0543	hybrid	CG02-064	WD1-SC-16-24	Guatemala	0.002	0.002	0.002	0.003	0.992	S. officinarum
SAC0544	hybrid	CG03-240	WD1-SC-16-25	Guatemala	0.003	0.001	0.001	0.001	0.994	S. officinarum
SAC0545	hybrid	CG04-09514	WD1-SC-16-26	Guatemala	0.005	0.037	0.015	0.008	0.935	S. officinarum
SAC0546	hybrid	CG04-09543	WD1-SC-16-28	Guatemala	0.001	0.001	0.003	0.001	0.994	S. officinarum
SAC0547	hybrid	UNKNOWN SAC. HYBRID	WD1-SC-16-30	Unknown	0.01	0.022	0.003	0.002	0.963	S. officinarum
SAC0556	hybrid	CG04-10295	WD1-SC-17-18	Guatemala	0.001	0.018	0.006	0.015	0.96	S. officinarum
SAC0561	hybrid	CP 65-357	GH	US	0.006	0.002	0.007	0.014	0.971	S. officinarum
SAC0568	hybrid	R570	WD1-SC-18-02	Unknown	0.006	0.001	0.002	0.001	0.99	S. officinarum
SAC0582	hybrid	B 60321	WD1-SC-18-34	Barbados	0.006	0.1	0.523	0.368	0.003	S. sinense_S. barberi_S. spontaneum
SAC0583	hybrid	R 397	WD1-SC-18-35	India	0.001	0.001	0.001	0.002	0.995	S. officinarum
SAC0584	hybrid	CO 270	WD1-SC-19-01	India	0.007	0.02	0.036	0.289	0.648	S. spontaneum_S. officinarum
SAC0585	hybrid	NCO 310	WD1-SC-19-04	South Africa	0.004	0.001	0.002	0	0.993	S. officinarum
SAC0588	hybrid	CP 89-2143	WD1-SC-19-10	US	0.001	0.003	0.006	0.018	0.972	S. officinarum
SAC0591	hybrid	UNKNOWN SAC. HYBRID	WD1-SC-19-15	Unknown	0.021	0.003	0.003	0.002	0.972	S. officinarum
SAC0593	hybrid	CG02-163	WD1-SC-19-18	Guatemala	0.001	0.002	0.003	0.001	0.994	S. officinarum
SAC0600	hybrid	POJ 3016	WD1-SC-19-36	Indonesia	0.02	0.002	0.008	0.003	0.967	S. officinarum
SAC0605	hybrid	F 154	WD1-SC-20-04	Taiwan	0.007	0.001	0.002	0.003	0.987	S. officinarum
SAC0609	hybrid	FALSA CRISTALINA	WD1-SC-20-10	Brazil	0	0.003	0.003	0.005	0.988	S. officinarum
SAC0633	hybrid	CP 70-1133	WD1-SC-21-18	US	0.003	0.001	0.002	0.002	0.992	S. officinarum
SAC0634	hybrid	CP 36-0105	WD1-SC-21-20	US	0.002	0.001	0.008	0.017	0.972	S. officinarum
SAC0635	hybrid	CO 313	WD1-SC-21-23	South Africa	0.003	0.001	0.005	0.002	0.989	S. officinarum
SAC0636	hybrid	CO 312	WD1-SC-21-24	South Africa	0.002	0.001	0.005	0.003	0.989	S. officinarum
SAC0637	hybrid	B54-142	WD1-SC-21-26	Barbados	0.005	0.162	0.002	0.003	0.828	S. officinarum
SAC0639	hybrid	PB 52-1-1	WD1-SC-21-32	Myanmar	0.422	0.042	0.11	0.243	0.183	S. robustum_S. spontaneum_S. officinarum_S. barberi
SAC0640	hybrid	POJ 2725	WD1-SC-21-33	Indonesia	0.007	0.164	0.008	0.054	0.766	S. officinarum_S. sinense
SAC0655	hybrid	US 71-53-01	WD1-SC-22-35	Taiwan	0.41	0.587	0.002	0.001	0.001	S. robustum_S. officinarum
SAC0657	hybrid	US 71-53-01	WD1-SC-22-37	Taiwan	0.002	0.001	0.004	0.001	0.991	S. officinarum
SAC0658	hybrid	VOMA	WD1-SC-22-38	Unknown	0.091	0.041	0.029	0.011	0.829	S. officinarum
SAC0661	hybrid	R 570	GH 1 (T24)	Unknown	0.009	0.001	0.002	0.001	0.988	S. officinarum
SAC0665	hybrid	Diamond 10	LH 2 (T5)	Barbados	0.01	0.001	0.004	0.003	0.983	S. officinarum
SAC0668	hybrid	M 147/44	LH 2 (T5)	India	0.016	0.002	0.012	0.003	0.968	S. officinarum
SAC0674	hybrid	CP 72-0370	FSN 1 (R2), 1 (R8)	US	0.003	0	0.002	0.001	0.994	S. officinarum
SAC0681	hybrid	US 71-0501	GH 1 (T24)	Unknown	0.118	0.029	0.019	0.012	0.822	S. officinarum
SAC0684	hybrid	B 49119	GH 2 (T14), 1 (pot on gournd)	Unknown	0.01	0.001	0.002	0.002	0.986	S. officinarum
SAC0691	hybrid	COS 510	GH 2 (T22), 1 (pot on ground)	Unknown	0.002	0	0.002	0.001	0.995	S. officinarum
SAC0692	hybrid	CG04-09615	GH 2 (T24)	Unknown	0.002	0.031	0.045	0.017	0.906	S. officinarum
SAC0694	hybrid	BO 14	GH 3 (T14)	Unknown	0.002	0	0.001	0.001	0.995	S. officinarum
SAC0698	hybrid	POJ 2803	GH 3 (T22), 1 (pot on ground)	Unknown	0.018	0.316	0.01	0.291	0.364	S. sinense_S. officinarum
SAC0700	hybrid	B 54142	LH 1 (T2)	Unknown	0.006	0.162	0.002	0.008	0.822	S. officinarum
SAC0702	hybrid	UCW 54-63	LH 1 (T3)	Unknown	0.028	0.001	0.002	0.004	0.965	S. officinarum
SAC0707	hybrid	CO 0997	LH 1 (T3)	Unknown	0.003	0	0.003	0.004	0.99	S. officinarum
SAC0709	hybrid	Q 96	LH 1 (T5)	Unknown	0.062	0.003	0.001	0.001	0.933	S. officinarum
SAC0714	hybrid	CO 0975	LH 1 (T5)	Unknown	0.001	0.001	0.002	0.002	0.993	S. officinarum
SAC0728	hybrid	M 63/39	LH 2 (T6)	Unknown	0.051	0.001	0.003	0.012	0.933	S. officinarum
SAC0746	hybrid	H 38-2915	FSN 1 (R3)	Unknown	0.098	0.184	0.016	0.003	0.7	S. sinense_S. officinarum
SAC0753	hybrid	CO 0453	FSN 2 (R2)	Unknown	0.002	0.002	0.001	0.001	0.993	S. officinarum
SAC0754	hybrid	CP 66-0346	FSN 2 (R2)	Unknown	0.004	0	0.003	0.003	0.99	S. officinarum
SAC0755	hybrid	POJ 2354	FSN 2 (R3), 2 (R5)	Unknown	0.002	0.033	0.002	0.191	0.773	S. officinarum_S. spontaneum
SAC0756	hybrid	CO 0475	FSN 2 (R4)	Unknown	0.004	0.002	0.001	0.001	0.992	S. officinarum
SAC0764	hybrid	CP 48-0103	FSN 3 (R2)	Unknown	0.08	0	0.003	0.006	0.911	S. officinarum
SAC0765	hybrid	Q 064	FSN 3 (R3)	Unknown	0.002	0.001	0.001	0.001	0.995	S. officinarum
SAC0766	hybrid	M 555/60	FSN 3 (R3)	Unknown	0.041	0.001	0.002	0.015	0.941	S. officinarum
SAC0768	hybrid	CR 00440	FSN 3 (R6)	Unknown	0.127	0.178	0.011	0.293	0.391	S. officinarum_S. spontaneum_S. robustum_S. sinense_
SAC0770	hybrid	CO 0331	FSN 4 (R2)	Unknown	0.002	0.001	0.001	0.004	0.992	S. officinarum
SAC0771	hybrid	SP 70-1143	FSN 4 (R4)	Unknown	0.003	0.001	0.001	0.002	0.992	S. officinarum
SAC1026	hybrid	US 74-0069	WD1-SC-39-160	Unknown	0.002	0.002	0.001	0.995	0	S. spontaneum
SAC1157	hybrid	H 051-9001	WD1-SC-43-55	US	0.001	0.011	0.001	0.986	0.001	S. spontaneum
SAC1482	hybrid	US 67-22-2	WD1-SC-09-10A	US	0.002	0.001	0.003	0.382	0.613	S. officinarum_S. spontaneum
SAC1483	hybrid	US 67-22-2	WD1-SC-09-10B	US	0.002	0.001	0.005	0.37	0.623	S. officinarum_S. spontaneum
SAC1484	hybrid	US 67-22-2	WD1-SC-09-10C	US	0.002	0.001	0.002	0.365	0.63	S. officinarum_S. spontaneum
SAC1485	hybrid	US 67-22-2	WD1-SC-09-10D	US	0.002	0.001	0.002	0.375	0.621	S. officinarum_S. spontaneum
SAC1486	hybrid	US 67-22-2	WD1-SC-09-10E	US	0.002	0.001	0.005	0.372	0.62	S. officinarum_S. spontaneum
